# Supplementary material
Source: Research Square preprint supplement (doi:10.21203/rs.3.rs-10021158/v1)
Supplement: Supplementary file 1 [file 5aae27a099fd65224b2094f7.xlsx]

## Sheet: CpG
Index	chr	start	end	width	CpGs	betaCoefficient	statistic	p.value	q.value	direction	difference	CpG.Island	CpG.Shore	CpG.Shelf	Open.Sea	annotation	geneId	distanceToTSS	geneSymbol	gene
30	chr5	20250236	20250670	435	13	-1.63514	-7.76892	1.57448e-05	0.00279936	Hypomethylated	-52	No	No	No	Yes	3&apos; UTR	AT5G49830	4419	EXO84B	Encodes a member of the exocyst complex gene family. The exocyst is a protein complex involved in tethering vesicles to the plasma membrane during regulated or polarized secretion.
11	chr1	22781636	22782536	901	10	-1.34194	-10.8308	1.50085e-05	0.00497102	Hypomethylated	-43	No	No	No	Yes	3&apos; UTR	AT1G61690	4406	FYVE4
389	chr3	6800828	6801547	720	20	-1.11282	-6.03446	0.000282965	0.0301205	Hypomethylated	-35	No	Yes	Yes	No	3&apos; UTR	AT3G19570	3357	QWRF1	Encodes SCO3 (snowy cotyledon3), a member of a largely uncharacterized protein family unique to the plant kingdom. The sco3-1 mutation alters chloroplast morphology and development, reduces chlorophyll accumulation, impairs thylakoid formation and photosynthesis in seedlings, and results in photoinhibition under extreme CO(2) concentrations in mature leaves. SCO3 is targeted to the periphery of p…
240	chr2	363192	364238	1047	41	-0.840825	-7.75404	0.000101451	0.0282724	Hypomethylated	-27	No	No	No	Yes	3&apos; UTR	AT2G01830	3458	AHK4	Histidine kinase: cytokinin-binding receptor that transduces cytokinin signals across the plasma membrane
328	chr1	23034171	23034615	445	18	-0.85793	-5.92975	0.000225127	0.0181058	Hypomethylated	-27	No	No	No	Yes	3&apos; UTR	AT1G62310	5172	JMJ29
424	chr3	16226459	16226953	495	17	-0.840951	-5.86223	0.000336022	0.0317728	Hypomethylated	-27	No	No	No	Yes	3&apos; UTR	AT3G44680	3056	AtHDA9	Class I RPD3 type protein
189	chr4	8070417	8071136	720	21	-0.831769	-6.28667	6.47794e-05	0.00562942	Hypomethylated	-26	No	No	No	Yes	3&apos; UTR	AT4G13970	4519
230	chr4	6805840	6806741	902	38	-0.827145	-6.23855	8.63726e-05	0.00710558	Hypomethylated	-26	No	No	No	Yes	3&apos; UTR	AT4G11160	3668
51	chr5	8889121	8889967	847	35	-0.777463	-7.41407	1.57448e-05	0.00279936	Hypomethylated	-25	No	No	No	Yes	3&apos; UTR	AT5G25520	4033
170	chr1	8312118	8312550	433	18	-0.733405	-6.84754	6.00339e-05	0.00927924	Hypomethylated	-23	No	Yes	Yes	No	3&apos; UTR	AT1G23400	3326	ATCAF2	Promotes the splicing of chloroplast group II introns.
236	chr1	19661797	19662258	462	22	-0.70759	-6.43728	9.00509e-05	0.0121034	Hypomethylated	-23	No	No	No	Yes	3&apos; UTR	AT1G52780	3183
311	chr1	11253115	11253724	610	23	-0.736936	-6.07381	0.00019511	0.0181058	Hypomethylated	-23	No	No	Yes	Yes	3&apos; UTR	AT1G31420	3515	FEI1	Encodes a plasma membrane localized leucine-rich repeat receptor kinase that is involved in cell wall elongation. Loss of function mutations of FEI1 and FEI2 exhibit defects in root and hypocotyl cell elongation. Double mutants are defective in cell wall biosynthesis and have thick hypocotyls, and short, thick roots.
445	chr3	20242920	20243718	799	18	-0.683425	-5.83109	0.000353707	0.0317728	Hypomethylated	-22	No	Yes	Yes	No	3&apos; UTR	AT3G54670	7414	ATSMC1	Encodes a member of the Arabidopsis cohesin complex that is essential for viability and sister chromatid alignment.
689	chr4	11193700	11193998	299	10	-0.675317	-5.12519	0.00103647	0.0321358	Hypomethylated	-21	No	No	No	Yes	3&apos; UTR	AT4G20920	4070
399	chr3	4153120	4154692	1573	32	-0.62663	-5.99983	0.000300651	0.0301205	Hypomethylated	-20	No	No	No	Yes	3&apos; UTR	AT3G12980	6721	ATHPCAT4	Encodes an enzyme with histone acetyltransferase activity that can use both H3 and H4 histones as substrates. No single prior lysine acetylation is sufficient to block HAC5 acetylation of the H3 or H4 peptides, suggesting that HAC5 can acetylate any of several lysines present in the peptides. Di-acetylation of both lysines 9 and 14 on the H3 peptide significantly reduces the level of incorporated…
192	chr4	9713432	9714103	672	13	0.630322	6.46087	6.47794e-05	0.00562942	Hypermethylated	20	No	No	No	Yes	3&apos; UTR	AT4G17380	4748	ATMSH4	Encodes the Arabidopsis homolog of MSH4, a meiosis-specific member of the MutS-homolog family of genes. It is expressed only in floral tissues and only during early meiotic prophase I, preceding the synapsis of homologous chromosomes. It is involved in the early steps of recombination.
555	chr5	20866461	20867195	735	17	0.673573	5.43191	0.000566813	0.0331414	Hypermethylated	21	No	No	No	Yes	3&apos; UTR	AT5G51340	3559	SCC4
440	chr4	15884605	15885407	803	17	0.713253	5.60872	0.00034549	0.0167848	Hypermethylated	23	No	No	Yes	No	3&apos; UTR	AT4G32910	3360	NUP85
113	chr3	8047681	8048538	858	25	0.848647	9.0855	3.53707e-05	0.0158419	Hypermethylated	27	No	No	No	Yes	3&apos; UTR	AT3G22760	3254	SOL1	CXC domain containing TSO1-like protein 1. The gene is expressed in stamens, pollen mother cells, and immature ovules.
372	chr4	10636915	10637616	702	15	1.0342	5.87576	0.000259118	0.0144032	Hypermethylated	33	No	No	No	Yes	3&apos; UTR	AT4G19510	3296
96	chr4	6281653	6282444	792	21	-1.91956	-15.9477	2.15931e-05	0.00484472	Hypomethylated	-61	No	No	No	Yes	Distal Intergenic	AT4G10040	4705	CYTC-2	Encodes cytochrome c. Promoter directs preferential expression in vascular tissues of cotyledons, leaves, roots, and hypocotyls, and in anthers.
292	chr2	4651405	4652000	596	12	0.84738	6.83227	0.000182611	0.0282724	Hypermethylated	27	No	No	No	Yes	Distal Intergenic	AT2G11610	-4594
289	chr2	6178915	6179500	586	12	1.36604	7.12176	0.000182611	0.0282724	Hypermethylated	43	No	No	No	Yes	Distal Intergenic	AT2G14510	-3820
116	chr4	9902259	9902795	537	16	1.3999	6.86668	4.31863e-05	0.00484472	Hypermethylated	45	No	No	No	Yes	Distal Intergenic	AT4G17810	-4026	EMB3022
8	chr1	25723733	25724236	504	17	-1.44531	-8.6191	1.50085e-05	0.00497102	Hypomethylated	-46	No	No	No	Yes	Downstream	AT1G68550	3150	CRF10	encodes a member of the ERF (ethylene response factor) subfamily B-6 of ERF/AP2 transcription factor family. The protein contains one AP2 domain. There are 12 members in this subfamily including RAP2.11.
744	chr4	7382104	7382618	515	14	-0.959826	-4.92434	0.00174904	0.0463159	Hypomethylated	-31	No	No	Yes	No	Downstream	AT4G12450	4313
208	chr3	1962427	1963101	675	75	-0.715132	-7.7474	7.07414e-05	0.016832	Hypomethylated	-23	No	No	Yes	No	Downstream	AT3G06433	3526
199	chr3	20004396	20004817	422	12	-1.40387	-7.83778	7.07414e-05	0.016832	Hypomethylated	-45	No	No	No	Yes	Exon	AT3G54010	3575	DEI1	Immunophilin-like protein similar to the p59 FK506-binding protein (FKBP52). Shows rotamase activity and contains an FKBP-like domain and three tetratricopeptide repeat units. Members of this class of mutation show ectopic cell proliferation in cotyledons. Gene may be alternatively spliced.
522	chr1	22569835	22570290	456	14	-1.05524	-5.36531	0.000525297	0.0282843	Hypomethylated	-34	No	No	No	Yes	Exon	AT1G61210	5476	DWA3
306	chr1	7773685	7774061	377	11	-1.04907	-6.03435	0.00019511	0.0181058	Hypomethylated	-33	No	No	No	Yes	Exon	AT1G22060	7478
346	chr1	29108731	29109519	789	24	-1.0479	-5.66789	0.000240136	0.0181058	Hypomethylated	-33	No	No	No	Yes	Exon	AT1G77460	5123	CSI3
123	chr4	6293276	6294085	810	25	-0.994197	-6.69495	4.31863e-05	0.00484472	Hypomethylated	-32	No	No	No	Yes	Exon	AT4G10060	4455	GCD3
177	chr5	6279176	6279847	672	12	-0.970322	-6.44753	6.29792e-05	0.00844115	Hypomethylated	-31	No	No	Yes	No	Exon	AT5G18830	3281	ATSPL7	Encodes a member of the Squamosa Binding Protein family of transcriptional regulators. SPL7 is expressed highly in roots and appears to play a role in copper homeostasis. Mutants are hypersensitive to copper deficient conditions and display a retarded growth phenotype. SPL7 binds to the promoter of the copper responsive miRNAs miR398b and miR389c.
505	chr4	14210523	14211151	629	13	-0.957341	-5.41787	0.000496642	0.0202933	Hypomethylated	-30	No	No	No	Yes	Exon	AT4G28760	3063	TRM20
163	chr1	24377663	24378260	598	20	-0.910046	-6.77455	6.00339e-05	0.00927924	Hypomethylated	-29	No	No	No	Yes	Exon	AT1G65580	5826	FRA3
524	chr1	10129223	10129517	295	12	-0.820269	-5.35258	0.000525297	0.0282843	Hypomethylated	-26	No	No	No	Yes	Exon	AT1G29030	4444
50	chr5	20716072	20717012	941	41	-0.777937	-7.10336	1.57448e-05	0.00279936	Hypomethylated	-25	No	No	No	Yes	Exon	AT5G50920	3669	ATHSP93-V	Encodes a protein that is similar to ATP-dependent Clp protease ATP-binding subunit / ClpC. Involved in protein import into the chloroplast. May provide ATP source that drives the TIC (Translocon at the Inner envelope membrane of Chloroplasts) translocation machinery.
719	chr1	18262243	18262929	687	13	-0.749304	-4.91929	0.00127572	0.0451566	Hypomethylated	-24	No	No	No	Yes	Exon	AT1G49340	10193	ATPI4K	Encodes a phosphatidylinositol 4-kinase that is expressed in inflorescences and shoots.
279	chr3	12596022	12596876	855	27	-0.736793	-6.62312	0.000176853	0.0269312	Hypomethylated	-23	No	No	No	Yes	Exon	AT3G30842	3556	ABCG38
375	chr4	18327543	18328331	789	38	-0.708999	-5.78538	0.000259118	0.0144032	Hypomethylated	-23	No	No	No	Yes	Exon	AT4G39400	3086	ATBRI1	Encodes a plasma membrane localized leucine-rich repeat receptor kinase involved in brassinosteroid signal transduction. BRI1 ligand is brassinolide which binds at the extracellular domain. Binding results in phosphorylation of the kinase domain which activates the BRI1 protein leading to BR responses. Residue T-1049 and either S-1044 or T-1045 were essential for kinase function in vitro and norm…
352	chr1	4469427	4470127	701	25	-0.680458	-5.78828	0.000240136	0.0181058	Hypomethylated	-22	No	No	No	Yes	Exon	AT1G13120	3192	AtGLE1
573	chr1	1794888	1795762	875	15	-0.692858	-5.24681	0.000585331	0.0285703	Hypomethylated	-22	No	No	No	Yes	Exon	AT1G05910	4672	BRAT1
559	chr1	21679670	21680256	587	21	-0.648197	-5.27128	0.000570322	0.0282843	Hypomethylated	-21	No	No	Yes	No	Exon	AT1G58360	3282	AAP1	Encodes AAP1 (amino acid permease 1), a neutral amino acid transporter expressed in seeds. Functions in amino acid uptake into embryos.
355	chr1	2668157	2668849	693	17	-0.637591	-5.77454	0.000240136	0.0181058	Hypomethylated	-20	No	No	Yes	Yes	Exon	AT1G08450	3043	AtCRT3	Encodes one of three Arabidopsis calreticulins. In CRT-deficient mouse fibroblasts, this protein restores ER Ca2+ levels. Non-receptor component required for EFR-mediated immunity. Mutants show de-repressed anthocyanin accumulation in the presence of elf18, and EFR accumulation and signalling.
576	chr2	1401481	1401905	425	15	-0.639671	-5.67456	0.000588414	0.0458753	Hypomethylated	-20	No	Yes	No	No	Exon	AT2G04160	5922	AIR3	isolated from differential screening of a cDNA library from auxin-treated root culture. encodes a protein similar to subtilisin-like serine protease which is believed to be active outside the plant cell.
604	chr1	20502838	20503546	709	20	-0.618902	-5.16812	0.00069039	0.0315403	Hypomethylated	-20	No	No	No	Yes	Exon	AT1G54960	3062	ANP2	member of MEKK subfamily
556	chr5	16221167	16222097	931	20	0.641302	5.4265	0.000566813	0.0331414	Hypermethylated	20	No	No	No	Yes	Exon	AT5G40480	8131	EMB3012
579	chr3	21688294	21688885	592	17	0.665276	5.49394	0.000601302	0.0423918	Hypermethylated	21	No	No	Yes	No	Exon	AT3G58640	5043	RAF15
190	chr4	16620283	16621192	910	23	0.676774	6.29096	6.47794e-05	0.00562942	Hypermethylated	22	No	No	No	Yes	Exon	AT4G34890	3999	ATXDH1	Encodes a xanthine dehydrogenase, involved in purine catabolism. Ubiquitously expressed, but the transcript level is altered during aging, senescence, salt and cold stress, ABA treatment, and dark treatment. RNAi lines that suppress both XDH1 and XDH2 produce small plants with reduced fertility and accelerated leaf senescence. Role in drought tolerance.
169	chr1	30125530	30126811	1282	25	0.743555	6.79982	6.00339e-05	0.00927924	Hypermethylated	24	No	No	Yes	No	Exon	AT1G80070	7683	EMB14	Genetic locus involved in embryogenesis. Mutations in this locus result in an abnormal suspensor and embryo lethality.
484	chr2	2429545	2430794	1250	20	0.796284	5.93732	0.000446383	0.0406023	Hypermethylated	25	No	No	No	Yes	Exon	AT2G06210	5893	ELF8	Encodes a yeast CTR9 homolog that is involved in the control of flowering time by elevating FLC expression to a level that creates the vernalization-responsive, winter-annual habit. Yeast CTR9 is a component of a five-member PAF1 complex that associates with RNA pol II and is thought to regulate gene expression by recruiting SET1 (a histone 3 Lys 4 [H3-K4] methyl transferase) to the initially tra…
566	chr4	18154993	18155550	558	17	0.799374	5.33022	0.000583015	0.0220687	Hypermethylated	25	No	No	No	Yes	Exon	AT4G38950	3323
643	chr1	7774508	7775056	549	13	0.78862	5.07367	0.000870492	0.0366952	Hypermethylated	25	No	No	No	Yes	Exon	AT1G22060	6483
733	chr4	18011256	18011791	536	13	0.774287	5.01004	0.00144674	0.0413259	Hypermethylated	25	No	No	No	Yes	Exon	AT4G38510	3210	AtVAB2
348	chr1	17059069	17059854	786	13	0.825671	5.67091	0.000240136	0.0181058	Hypermethylated	26	No	No	No	Yes	Exon	AT1G45120	3714
739	chr4	12556952	12557226	275	13	0.814207	4.9703	0.0015763	0.0424706	Hypermethylated	26	No	No	No	Yes	Exon	AT4G24200	3718
164	chr1	20373563	20374014	452	12	0.846925	7.03566	6.00339e-05	0.00927924	Hypermethylated	27	No	No	No	Yes	Exon	AT1G54560	6142	ATXIE	Member of Myosin-like proteins
699	chr1	21569243	21569752	510	12	0.855531	4.96893	0.00114064	0.0430014	Hypermethylated	27	No	No	No	Yes	Exon	AT1G58230	3186	BCHB
336	chr3	20792938	20793706	769	19	0.870217	6.29628	0.000229909	0.0301205	Hypermethylated	28	No	Yes	No	No	Exon	AT3G56040	3964	UGP3
338	chr5	13431290	13432163	874	19	0.870752	5.92682	0.000236172	0.019784	Hypermethylated	28	No	No	No	Yes	Exon	AT5G35180	6974
592	chr4	13928413	13928682	270	10	0.989689	5.28131	0.000647794	0.0239335	Hypermethylated	32	No	No	Yes	Yes	Exon	AT4G28000	3075
504	chr4	7825721	7826172	452	11	-2.44392	-5.45788	0.000496642	0.0202933	Hypomethylated	-78	No	Yes	No	No	Promoter	AT4G13460	825	SDG22	Encodes a SU(VAR)3-9 homolog, a SET domain protein. Known SET domain proteins are involved in epigenetic control of gene expression and act as histone methyltransferases. There are 10 SUVH genes in Arabidopsis and members of this subfamily of the SET proteins have an additional conserved SRA domain. A plant line expressing an RNAi construct directed against this gene has reduced agrobacterium-med…
27	chr5	14088969	14089879	911	30	-2.15768	-45.4655	1.57448e-05	0.00279936	Hypomethylated	-69	No	No	No	Yes	Promoter	AT5G35935	12
94	chr4	5987466	5988468	1003	42	-2.10065	-24.6915	2.15931e-05	0.00484472	Hypomethylated	-67	No	No	No	Yes	Promoter	AT4G09455	47
81	chr2	7632856	7633488	633	10	-1.95719	-37.2454	2.02901e-05	0.00781648	Hypomethylated	-62	No	Yes	No	No	Promoter	AT2G06995	0
3	chr1	11953363	11954256	894	25	-1.92439	-42.5918	1.50085e-05	0.00497102	Hypomethylated	-61	No	No	No	Yes	Promoter	AT1G32975	274
69	chr3	12799279	12800096	818	18	-1.92767	-19.1679	1.76853e-05	0.0096183	Hypomethylated	-61	No	No	Yes	Yes	Promoter	AT3G31430	-2408
5	chr1	16881674	16882428	755	17	-1.87597	-19.1018	1.50085e-05	0.00497102	Hypomethylated	-60	No	No	No	Yes	Promoter	AT1G44707	514
82	chr2	2082096	2082633	538	24	-1.88925	-11.8535	2.02901e-05	0.00781648	Hypomethylated	-60	No	No	No	Yes	Promoter	AT2G05620	-237	AtPGR5	Involved in electron flow in Photosystem I. Essential for photoprotection.
363	chr3	16755048	16755623	576	13	-1.76748	-6.20458	0.000247595	0.0301205	Hypomethylated	-56	No	No	No	Yes	Promoter	AT3G45638	640
97	chr4	15627034	15628661	1628	22	-1.74057	-27.1466	2.15931e-05	0.00484472	Hypomethylated	-55	No	No	No	Yes	Promoter	AT4G32370	1476
29	chr5	10342250	10343169	920	11	-1.67294	-9.02969	1.57448e-05	0.00279936	Hypomethylated	-53	No	No	No	Yes	Promoter	AT5G28390	0
31	chr5	10265391	10265890	500	13	-1.62433	-8.21094	1.57448e-05	0.00279936	Hypomethylated	-52	No	No	No	Yes	Promoter	AT5G28285	2730
98	chr4	8087874	8088917	1044	27	-1.64381	-10.9083	2.15931e-05	0.00484472	Hypomethylated	-52	No	No	No	Yes	Promoter	AT4G13992	564
32	chr5	8586363	8587098	736	12	-1.53676	-9.8707	1.57448e-05	0.00279936	Hypomethylated	-49	No	No	Yes	No	Promoter	AT5G24920	1828	AtGDU5	Encodes a member of the GDU (glutamine dumper) family proteins involved in amino acid export: At4g31730 (GDU1), At4g25760 (GDU2), At5g57685 (GDU3), At2g24762 (GDU4), At5g24920 (GDU5), At3g30725 (GDU6) and At5g38770 (GDU7).
148	chr1	20433941	20434297	357	19	-1.54732	-7.05485	4.50254e-05	0.00927924	Hypomethylated	-49	No	No	No	Yes	Promoter	AT1G54760	29	AGL85
33	chr5	14821242	14821874	633	10	-1.5027	-10.3152	1.57448e-05	0.00279936	Hypomethylated	-48	No	No	No	Yes	Promoter	AT5G37381	-910
99	chr4	18474027	18474799	773	11	-1.49789	-15.3963	2.15931e-05	0.00484472	Hypomethylated	-48	No	No	Yes	No	Promoter	AT4G39810	1005	NEN4
371	chr4	5337825	5338511	687	10	-1.44488	-5.85194	0.000259118	0.0144032	Hypomethylated	-46	No	No	No	Yes	Promoter	AT4G08410	2698	EXT8
115	chr4	5734904	5735447	544	16	-1.41565	-7.00431	4.31863e-05	0.00484472	Hypomethylated	-45	No	No	No	Yes	Promoter	AT4G08945	2236
9	chr1	16924687	16925148	462	24	-1.39224	-16.0404	1.50085e-05	0.00497102	Hypomethylated	-44	No	No	No	Yes	Promoter	AT1G44810	1247	GPL4
100	chr4	6579385	6580221	837	12	-1.38583	-9.74885	2.15931e-05	0.00484472	Hypomethylated	-44	No	No	No	Yes	Promoter	AT4G05805	0
239	chr2	18845787	18846163	377	13	-1.37057	-7.74494	0.000101451	0.0282724	Hypomethylated	-44	No	No	Yes	No	Promoter	AT2G45760	1672	BAL	Encodes a protein that is similar to BONZAI1-binding protein BAP1.
10	chr1	23754663	23755808	1146	12	-1.36609	-9.72755	1.50085e-05	0.00497102	Hypomethylated	-43	No	Yes	No	No	Promoter	AT1G64035	1928
12	chr1	24572115	24573067	953	26	-1.3355	-10.9719	1.50085e-05	0.00497102	Hypomethylated	-43	No	No	No	Yes	Promoter	AT1G65990	404	PRXIIA
72	chr3	20853336	20854036	701	22	-1.36475	-9.88849	1.76853e-05	0.0096183	Hypomethylated	-43	No	No	No	Yes	Promoter	AT3G56210	1523
86	chr2	4500729	4501365	637	13	-1.34882	-13.0321	2.02901e-05	0.00781648	Hypomethylated	-43	No	No	No	Yes	Promoter	AT2G11320	0
87	chr2	7328463	7329656	1194	10	-1.33877	-10.7748	2.02901e-05	0.00781648	Hypomethylated	-43	No	No	No	Yes	Promoter	AT2G16905	0
470	chr5	16602673	16603118	446	15	-1.35797	-5.70651	0.000409365	0.0294743	Hypomethylated	-43	No	No	No	Yes	Promoter	AT5G41494	84
13	chr1	25304798	25305418	621	25	-1.29821	-8.94127	1.50085e-05	0.00497102	Hypomethylated	-41	No	No	No	Yes	Promoter	AT1G67520	939
35	chr5	18065074	18066033	960	31	-1.29112	-9.46819	1.57448e-05	0.00279936	Hypomethylated	-41	No	No	Yes	No	Promoter	AT5G44770	62
74	chr3	10358292	10360406	2115	27	-1.30375	-13.6275	1.76853e-05	0.0096183	Hypomethylated	-41	No	No	No	Yes	Promoter	AT3G27910	-11
36	chr5	19413403	19414516	1114	12	-1.26384	-11.2761	1.57448e-05	0.00279936	Hypomethylated	-40	No	No	No	Yes	Promoter	AT5G47940	-1326
88	chr2	17362833	17363679	847	32	-1.24427	-9.36843	2.02901e-05	0.00781648	Hypomethylated	-40	No	No	No	Yes	Promoter	AT2G41640	2414	GT61
117	chr4	12096483	12097181	699	11	-1.26991	-8.08711	4.31863e-05	0.00484472	Hypomethylated	-40	No	No	No	Yes	Promoter	AT4G23080	989
217	chr5	13653149	13654226	1078	13	-1.26672	-6.30628	7.8724e-05	0.00879287	Hypomethylated	-40	No	Yes	No	No	Promoter	AT5G35420	1711
549	chr3	14734951	14735573	623	13	-1.26758	-5.57719	0.000565931	0.0406509	Hypomethylated	-40	No	No	No	Yes	Promoter	AT3G42646	0
101	chr4	10151118	10151631	514	12	-1.23123	-9.62412	2.15931e-05	0.00484472	Hypomethylated	-39	No	No	No	Yes	Promoter	AT4G18370	2167	DEG5	Encodes DEG5. Forms a hexamer with DEG8 in the thylakoid lumen. Involved in the cleavage of photodamaged D2 protein of photosystem II (PSII).
264	chr3	6026552	6027121	570	15	-1.23861	-6.72276	0.000141483	0.0256488	Hypomethylated	-39	No	No	No	Yes	Promoter	AT3G17611	1756	ATRBL10
119	chr4	7644042	7644656	615	13	-1.19426	-7.6571	4.31863e-05	0.00484472	Hypomethylated	-38	No	No	No	Yes	Promoter	AT4G13120	1931
482	chr2	18932263	18932568	306	11	-1.19261	-6.01303	0.000446383	0.0406023	Hypomethylated	-38	No	No	No	Yes	Promoter	AT2G46030	976	UBC6	Ubiquitin conjugating enzyme E2
450	chr3	8373231	8373833	603	12	-1.16075	-5.7385	0.000371392	0.0317728	Hypomethylated	-37	No	No	No	Yes	Promoter	AT3G23380	0	RIC5	Encodes a member of a novel protein family that contains contain a CRIB (for Cdc42/Rac-interactive binding) motif required for their specific interaction with GTP-bound Rop1 (plant-specific Rho GTPase). Interacts with Rop1 and is involved in pollen tube growth and function. Gene is expressed predominantly in inflorescence and flower tissue.
15	chr1	26710574	26711345	772	30	-1.14118	-12.7735	1.50085e-05	0.00497102	Hypomethylated	-36	No	No	No	Yes	Promoter	AT1G70830	117	MLP28
16	chr1	21449083	21449803	721	10	-1.1358	-8.30663	1.50085e-05	0.00497102	Hypomethylated	-36	No	Yes	No	No	Promoter	AT1G58010	0
75	chr3	1559901	1560747	847	28	-1.11995	-9.59046	1.76853e-05	0.0096183	Hypomethylated	-36	No	No	No	Yes	Promoter	AT3G05415	0
103	chr4	8824881	8825524	644	24	-1.12478	-8.60637	2.15931e-05	0.00484472	Hypomethylated	-36	No	No	No	Yes	Promoter	AT4G15420	1479
201	chr3	14274056	14274986	931	16	-1.13454	-7.81869	7.07414e-05	0.016832	Hypomethylated	-36	No	No	No	Yes	Promoter	AT3G42090	0
229	chr2	1119731	1120256	526	35	-1.12842	-7.77706	8.11606e-05	0.0279748	Hypomethylated	-36	No	No	Yes	No	Promoter	AT2G03670	2246	CDC48B	CDC48 - like protein AAA-type ATPaseCell. division control protein 48 homolog B
277	chr3	22059362	22060273	912	11	-1.12513	-6.54733	0.000176853	0.0269312	Hypomethylated	-36	No	No	Yes	Yes	Promoter	AT3G59720	0
447	chr2	551531	551943	413	11	-1.13765	-6.18337	0.000365223	0.0405397	Hypomethylated	-36	No	No	No	Yes	Promoter	AT2G02150	913	EMB2794
17	chr1	4068611	4069099	489	17	-1.09518	-9.95632	1.50085e-05	0.00497102	Hypomethylated	-35	No	No	Yes	No	Promoter	AT1G04923	314
19	chr1	9756630	9757273	644	26	-1.08748	-8.52615	1.50085e-05	0.00497102	Hypomethylated	-35	No	No	Yes	No	Promoter	AT1G28005	0
38	chr5	2305386	2306098	713	17	-1.11414	-8.29728	1.57448e-05	0.00279936	Hypomethylated	-35	No	No	No	Yes	Promoter	AT5G07310	0	ERF115	Encodes a member of the ERF (ethylene response factor) subfamily B-4 of ERF/AP2 transcription factor family. The protein contains one AP2 domain. There are 7 members in this subfamily.
39	chr5	15592107	15593059	953	11	-1.08675	-9.29559	1.57448e-05	0.00279936	Hypomethylated	-35	No	No	No	Yes	Promoter	AT5G38960	0
176	chr5	17640836	17641695	860	17	-1.08725	-6.40752	6.29792e-05	0.00844115	Hypomethylated	-35	No	No	No	Yes	Promoter	AT5G43880	2285	TRM21
185	chr4	2539577	2540609	1033	22	-1.08589	-6.26976	6.47794e-05	0.00562942	Hypomethylated	-35	No	No	Yes	No	Promoter	AT4G04970	2652	ATGSL01	Encodes a gene similar to callose synthase
202	chr3	11509323	11510529	1207	29	-1.11517	-7.78438	7.07414e-05	0.016832	Hypomethylated	-35	No	No	No	Yes	Promoter	AT3G05945	0
396	chr3	1266765	1267296	532	16	-1.08755	-6.01461	0.000300651	0.0301205	Hypomethylated	-35	No	No	No	Yes	Promoter	AT3G04670	1082	ATWRKY39	Member of WRKY Transcription Factor; Group II-d
582	chr1	4505750	4506157	408	11	-1.08814	-5.22023	0.000615348	0.0292653	Hypomethylated	-35	No	No	No	Yes	Promoter	AT1G13195	-2074
89	chr2	9038699	9039304	606	11	-1.06732	-9.27915	2.02901e-05	0.00781648	Hypomethylated	-34	No	Yes	No	No	Promoter	AT2G21060	-917	ATCSP4	Glycine-rich protein (AtGRP2b)
120	chr4	11208293	11208858	566	48	-1.05838	-7.48998	4.31863e-05	0.00484472	Hypomethylated	-34	No	No	No	Yes	Promoter	AT4G06975	505
121	chr4	9446280	9446732	453	12	-1.05348	-8.44218	4.31863e-05	0.00484472	Hypomethylated	-34	No	No	No	Yes	Promoter	AT4G16780	-2382	ATHB-2	Encodes a homeodomain-leucine zipper protein that is rapidly and strongly induced by changes in the ratio of red to far-red light. It is also involved in cell expansion and cell proliferation and in the response to auxin.
290	chr2	6360764	6361372	609	24	-1.06175	-6.8236	0.000182611	0.0282724	Hypomethylated	-34	No	No	No	Yes	Promoter	AT2G14820	2508	MEL3	A member of the NPY gene family (NPY1/AT4G31820, NPY2/AT2G14820, NPY3/AT5G67440, NPY4/AT2G23050, NPY5/AT4G37590). Involved in auxin-mediated organogenesis.
325	chr1	21046155	21046983	829	41	-1.07552	-5.86291	0.000225127	0.0181058	Hypomethylated	-34	No	No	No	Yes	Promoter	AT1G56230	2171
345	chr1	19486094	19486543	450	12	-1.07026	-5.78985	0.000240136	0.0181058	Hypomethylated	-34	No	Yes	No	No	Promoter	AT1G52320	1873
674	chr1	8836442	8836620	179	11	-1.0783	-5.03653	0.00099056	0.0395968	Hypomethylated	-34	No	No	No	Yes	Promoter	AT1G05927	230
108	chr1	13979921	13980747	827	11	-1.04118	-7.93849	3.0017e-05	0.00843568	Hypomethylated	-33	No	No	No	Yes	Promoter	AT1G36915	-811
246	chr4	1027328	1028037	710	16	-1.03761	-6.12194	0.000107966	0.00854036	Hypomethylated	-33	No	Yes	No	No	Promoter	AT4G02320	-1149	PMEI-PME40
40	chr5	17859471	17859860	390	13	-1.01386	-7.70822	1.57448e-05	0.00279936	Hypomethylated	-32	No	No	No	Yes	Promoter	AT5G44340	1290	TUB4	Beta-tubulin gene
104	chr4	8562356	8563089	734	33	-1.02038	-12.8327	2.15931e-05	0.00484472	Hypomethylated	-32	No	No	No	Yes	Promoter	AT4G14980	578
122	chr4	12452566	12453398	833	18	-1.00759	-6.85139	4.31863e-05	0.00484472	Hypomethylated	-32	No	No	Yes	Yes	Promoter	AT4G23980	1423	ARF9	Encodes auxin response factor 9 (ARF9).
162	chr1	25650381	25651281	901	15	-0.995274	-6.84962	6.00339e-05	0.00927924	Hypomethylated	-32	No	No	Yes	Yes	Promoter	AT1G68410	1721
186	chr4	7321456	7321990	535	18	-1.00498	-6.54695	6.47794e-05	0.00562942	Hypomethylated	-32	No	Yes	Yes	No	Promoter	AT4G12340	520
203	chr3	14469776	14470619	844	11	-1.00017	-8.12306	7.07414e-05	0.016832	Hypomethylated	-32	No	No	No	Yes	Promoter	AT3G42316	88
397	chr3	7328819	7329334	516	15	-0.996345	-5.95474	0.000300651	0.0301205	Hypomethylated	-32	No	No	No	Yes	Promoter	AT3G20920	1417	AtSEC62
427	chr2	8251709	8251947	239	18	-0.992577	-6.22871	0.000344933	0.0403386	Hypomethylated	-32	No	No	No	Yes	Promoter	AT2G19045	97	RALFL13	Member of a diversely expressed predicted peptide family showing sequence similarity to tobacco Rapid Alkalinization Factor (RALF), and is believed to play an essential role in the physiology of Arabidopsis. Consists of a single exon and is characterized by a conserved C-terminal motif and N-terminal signal peptide.
475	chr2	10888950	10889559	610	15	-0.996397	-6.1423	0.000426093	0.0406023	Hypomethylated	-32	No	No	No	Yes	Promoter	AT2G25580	941	MEF8
483	chr2	5082913	5083653	741	26	-1.00372	-6.02216	0.000446383	0.0406023	Hypomethylated	-32	No	No	No	Yes	Promoter	AT2G05835	-395
20	chr1	25454132	25454556	425	26	-0.983812	-8.15376	1.50085e-05	0.00497102	Hypomethylated	-31	No	No	No	Yes	Promoter	AT1G67880	1267
41	chr5	5855883	5856655	773	21	-0.986933	-8.91181	1.57448e-05	0.00279936	Hypomethylated	-31	No	No	No	Yes	Promoter	AT5G17740	1279
42	chr5	6788991	6789691	701	14	-0.98354	-7.92232	1.57448e-05	0.00279936	Hypomethylated	-31	No	No	No	Yes	Promoter	AT5G20100	-244	MASS3
373	chr4	6024398	6025090	693	13	-0.963149	-5.78087	0.000259118	0.0144032	Hypomethylated	-31	No	No	No	Yes	Promoter	AT4G09520	2033
406	chr1	20102831	20103482	652	42	-0.95945	-5.56574	0.000315178	0.0201584	Hypomethylated	-31	Yes	Yes	No	No	Promoter	AT1G53840	1532	ATPME1	Encodes a pectin methylesterase
492	chr5	8620210	8620960	751	17	-0.981903	-5.63316	0.000456599	0.0310773	Hypomethylated	-31	No	Yes	Yes	No	Promoter	AT5G25030	31
544	chr1	9931376	9931572	197	10	-0.976811	-5.30147	0.000555314	0.0282843	Hypomethylated	-31	No	No	No	Yes	Promoter	AT1G28323	2975
584	chr4	6357548	6358499	952	14	-0.969712	-5.29839	0.000626201	0.0232751	Hypomethylated	-31	No	No	No	Yes	Promoter	AT4G10201	1809
599	chr5	1801335	1802031	697	10	-0.963462	-5.33487	0.000677027	0.037096	Hypomethylated	-31	No	No	No	Yes	Promoter	AT5G05980	2429	ATDFB
654	chr4	14628111	14628747	637	11	-0.980985	-5.19184	0.000906912	0.0305773	Hypomethylated	-31	No	No	No	Yes	Promoter	AT4G29910	1993	ATORC5	Origin Recognition Complex subunit 5. Involved in the initiation of DNA replication. Interacts strongly with all ORC subunits.
21	chr1	24620108	24620549	442	34	-0.956338	-13.2753	1.50085e-05	0.00497102	Hypomethylated	-30	Yes	Yes	No	No	Promoter	AT1G66140	1568	ZFP4	Encodes a zinc finger protein containing only a single zinc finger.
90	chr2	441488	442143	656	49	-0.943521	-8.82821	2.02901e-05	0.00781648	Hypomethylated	-30	No	Yes	No	No	Promoter	AT2G01950	2181	BRL2	Encodes a leucine rich repeat receptor kinase and associated with provascular/procambial cells. Similar to BRI, brassinosteroid receptor protein.
124	chr4	8277735	8278134	400	17	-0.935633	-7.07403	4.31863e-05	0.00484472	Hypomethylated	-30	No	No	No	Yes	Promoter	AT4G14368	676
255	chr5	23083058	23083538	481	23	-0.932733	-6.10504	0.000125958	0.0124699	Hypomethylated	-30	No	No	No	Yes	Promoter	AT5G57035	2411
270	chr5	18015786	18016559	774	28	-0.938189	-5.98456	0.000173193	0.0150886	Hypomethylated	-30	No	No	No	Yes	Promoter	AT5G44660	264
341	chr4	419691	420328	638	12	-0.954883	-5.88856	0.000237525	0.0144032	Hypomethylated	-30	No	No	No	Yes	Promoter	AT4G00970	1364	CRK41	Encodes a cysteine-rich receptor-like protein kinase.
615	chr1	6132299	6132687	389	17	-0.955613	-5.13779	0.000750424	0.0334588	Hypomethylated	-30	No	No	No	Yes	Promoter	AT1G05333	2658
664	chr4	18225677	18226017	341	10	-0.947011	-5.15949	0.000950098	0.0310164	Hypomethylated	-30	No	No	No	Yes	Promoter	AT4G39120	1971	HISN7	Encodes a chloroplast-localized member of the myo-inositol monophosphatase family, IMPL2 (myo-Inositol monophosphatase like 2) that seems to have multiple enzymatic activities. It contributes to histidine biosynthesis based on it histidinol-phosphate phosphatase activity. In addition, the protein can act as an inositol monophosphatase and an L-galactose-1-phosphate phosphatase in vitro.
687	chr4	770649	771227	579	17	-0.931556	-5.12773	0.00103647	0.0321358	Hypomethylated	-30	No	No	No	Yes	Promoter	AT4G01790	850
738	chr4	17989715	17990103	389	16	-0.928041	-4.98741	0.00155471	0.0424706	Hypomethylated	-30	No	Yes	No	No	Promoter	AT4G38440	648	IYO
112	chr3	2658276	2659119	844	33	-0.925992	-8.92152	3.53707e-05	0.0158419	Hypomethylated	-29	Yes	Yes	No	No	Promoter	AT3G08760	1352	ATSIK	Encodes an osmotic stress-inducible kinase that functions as a negative regulator of osmotic stress signaling in plants.
125	chr4	11563365	11563762	398	15	-0.912457	-6.69481	4.31863e-05	0.00484472	Hypomethylated	-29	No	No	No	Yes	Promoter	AT4G21760	2242	BGLU47
204	chr3	2466292	2466823	532	25	-0.911491	-8.08488	7.07414e-05	0.016832	Hypomethylated	-29	No	No	No	Yes	Promoter	AT3G07720	1057
220	chr5	14794088	14795103	1016	23	-0.910829	-6.29114	7.8724e-05	0.00879287	Hypomethylated	-29	No	No	No	Yes	Promoter	AT5G37350	1269
307	chr1	22787896	22788185	290	11	-0.903909	-5.97044	0.00019511	0.0181058	Hypomethylated	-29	No	No	No	Yes	Promoter	AT1G61700	884		Protein of unknown function that is homologous to the At1g11475 locus that encodes a non-catalytic subunit common to nuclear DNA-dependent RNA polymerases II, IV and V. Homologous to budding yeast RPB10.
365	chr3	7437165	7437651	487	14	-0.903989	-6.21121	0.000247595	0.0301205	Hypomethylated	-29	No	Yes	No	No	Promoter	AT3G21200	1139	GBP
451	chr3	1431694	1432163	470	21	-0.909816	-5.80786	0.000371392	0.0317728	Hypomethylated	-29	No	No	No	Yes	Promoter	AT3G05120	1331	ATGID1A	Encodes a gibberellin (GA) receptor ortholog of the rice GA receptor gene (OsGID1). Has GA-binding activity, showing higher affinity to GA4. Interacts with DELLA proteins in vivo in the presence of GA4. The DELLA region alone can interact with GID1A in GA-dependent manner in a Y2H assay.
494	chr1	17987849	17988180	332	15	-0.917214	-5.37474	0.000465263	0.02631	Hypomethylated	-29	No	No	No	Yes	Promoter	AT1G48640	1546
601	chr3	19672750	19673409	660	28	-0.897491	-5.42913	0.000689728	0.0473116	Hypomethylated	-29	No	No	No	Yes	Promoter	AT3G53065	24
22	chr1	13106032	13107041	1010	18	-0.888459	-10.7925	1.50085e-05	0.00497102	Hypomethylated	-28	No	No	No	Yes	Promoter	AT1G35537	-436	AtPDFL2.1	Encodes a defensin-like (DEFL) family protein.
45	chr5	9871105	9871735	631	26	-0.890832	-7.42251	1.57448e-05	0.00279936	Hypomethylated	-28	No	No	No	Yes	Promoter	AT5G27845	2757
126	chr4	9255397	9255810	414	27	-0.875592	-6.79816	4.31863e-05	0.00484472	Hypomethylated	-28	Yes	Yes	No	No	Promoter	AT4G16380	1194	AtHMP35
127	chr4	6714331	6714937	607	30	-0.867774	-8.19716	4.31863e-05	0.00484472	Hypomethylated	-28	No	No	No	Yes	Promoter	AT4G10955	453	PRLIP9
221	chr5	13864302	13865207	906	24	-0.867118	-6.24858	7.8724e-05	0.00879287	Hypomethylated	-28	No	No	No	Yes	Promoter	AT5G35688	0
247	chr4	2510271	2510761	491	23	-0.876864	-6.13659	0.000107966	0.00854036	Hypomethylated	-28	No	No	Yes	Yes	Promoter	AT4G04930	1218	DES-1-LIKE	Encodes a sphingolipid delta4-desaturase, involved in sphingolipid biosynthesis. Specifically expressed in floral tissues. Knockout mutants were devoid of sphinga-4,8-dienine in floral tissues.
260	chr4	10847371	10847951	581	22	-0.873867	-6.10478	0.000129559	0.00963106	Hypomethylated	-28	No	No	No	Yes	Promoter	AT4G20030	1085
285	chr1	1392940	1393311	372	18	-0.868537	-6.1623	0.000180102	0.0181058	Hypomethylated	-28	No	Yes	No	No	Promoter	AT1G04920	2642	ATSPS3F	Encodes a protein with putative sucrose-phosphate synthase activity.
431	chr1	20351343	20351858	516	11	-0.880939	-5.50417	0.000345195	0.0207879	Hypomethylated	-28	No	No	No	Yes	Promoter	AT1G54490	1234	AIN1	Involved in the ethylene response. XRN4 does not appear to regulate ethylene signaling via an RNA-INDUCED SILENCING COMPLEX-based RNA silencing mechanism but acts by independent means. Endogenous suppressor of posttranscriptional gene silencing.
477	chr1	25247861	25248293	433	10	-0.892494	-5.40526	0.000435246	0.0249165	Hypomethylated	-28	No	No	Yes	No	Promoter	AT1G67400	2898	ELMOD_C
478	chr5	6680489	6680957	469	15	-0.870516	-5.65518	0.000440855	0.0302419	Hypomethylated	-28	No	No	Yes	No	Promoter	AT5G19760	1097
506	chr4	95672	96494	823	19	-0.87716	-5.45088	0.000496642	0.0202933	Hypomethylated	-28	Yes	Yes	No	No	Promoter	AT4G00230	1929	XSP1
514	chr2	15930383	15930962	580	13	-0.88952	-5.79865	0.000507254	0.0425898	Hypomethylated	-28	No	Yes	No	No	Promoter	AT2G38070	1792	OPL2
539	chr1	29299851	29300504	654	19	-0.892178	-5.32961	0.000540305	0.0282843	Hypomethylated	-28	No	No	No	Yes	Promoter	AT1G77920	1608	TGA7
705	chr4	2652382	2652623	242	13	-0.878932	-5.06698	0.00118762	0.035229	Hypomethylated	-28	No	No	No	Yes	Promoter	AT4G05140	585
728	chr1	27286856	27287589	734	19	-0.893034	-4.88229	0.00139579	0.0483005	Hypomethylated	-28	No	No	No	Yes	Promoter	AT1G72480	933
46	chr5	5690521	5691381	861	20	-0.861656	-6.89965	1.57448e-05	0.00279936	Hypomethylated	-27	No	No	No	Yes	Promoter	AT5G17300	1539	RVE1	Myb-like transcription factor that regulates hypocotyl growth by regulating free auxin levels in a time-of-day specific manner.
47	chr5	10031156	10032075	920	18	-0.852018	-7.44808	1.57448e-05	0.00279936	Hypomethylated	-27	No	Yes	Yes	No	Promoter	AT5G28030	603	DES1
114	chr3	17698303	17699016	714	36	-0.833889	-8.54956	3.53707e-05	0.0158419	Hypomethylated	-27	No	No	No	Yes	Promoter	AT3G07835	99
128	chr4	11140657	11141369	713	27	-0.863502	-7.80429	4.31863e-05	0.00484472	Hypomethylated	-27	No	No	No	Yes	Promoter	AT4G20800	1048	AtBBE17
129	chr4	14849931	14850483	553	38	-0.846254	-8.15	4.31863e-05	0.00484472	Hypomethylated	-27	No	No	No	Yes	Promoter	AT4G30350	2348	SMXL2
178	chr5	15008553	15009283	731	26	-0.855978	-6.4816	6.29792e-05	0.00844115	Hypomethylated	-27	No	No	No	Yes	Promoter	AT5G37790	1974
222	chr5	13588568	13589030	463	28	-0.852035	-6.25439	7.8724e-05	0.00879287	Hypomethylated	-27	No	Yes	No	No	Promoter	AT5G35370	2241
223	chr5	7187262	7187846	585	15	-0.851494	-6.31649	7.8724e-05	0.00879287	Hypomethylated	-27	No	No	No	Yes	Promoter	AT5G21140	1850	emb1379
252	chr3	8966609	8967357	749	24	-0.842912	-6.83983	0.000123797	0.0241691	Hypomethylated	-27	No	Yes	No	No	Promoter	AT3G24560	2839	RSY3	Novel gene involved in embryogenesis
256	chr5	6328689	6329002	314	17	-0.860026	-6.14801	0.000125958	0.0124699	Hypomethylated	-27	No	No	No	Yes	Promoter	AT5G18950	1187
293	chr2	10232268	10232862	595	18	-0.840977	-6.57434	0.000182611	0.0282724	Hypomethylated	-27	No	No	No	Yes	Promoter	AT2G24070	2614	QWRF4
294	chr2	2240837	2242216	1380	14	-0.832754	-7.22371	0.000182611	0.0282724	Hypomethylated	-27	No	No	No	Yes	Promoter	AT2G05845	-2247
374	chr4	5777683	5778370	688	19	-0.835884	-5.80438	0.000259118	0.0144032	Hypomethylated	-27	No	No	No	Yes	Promoter	AT4G09010	1092	APX4	Encodes a protein that was initially believed to act as a microsomal ascorbate peroxidase APX4 but to date, no evidence of enzymatic activity has been found.
471	chr5	22584465	22584887	423	12	-0.840987	-5.69952	0.000409365	0.0294743	Hypomethylated	-27	No	No	Yes	No	Promoter	AT5G55810	1518	AtNMNAT	Encodes a bi-functional enzyme that expresses both nicotinamide-nucleotide adenylyltransferase (2.7.7.1) and nicotinate-nucleotide adenylyltransferase (2.7.7.18)activity.
491	chr4	12937345	12937686	342	11	-0.858037	-5.49232	0.000453456	0.0202741	Hypomethylated	-27	No	No	Yes	No	Promoter	AT4G25270	1224	OTP70
495	chr2	585179	585768	590	26	-0.858504	-5.87296	0.000466673	0.0418664	Hypomethylated	-27	No	No	No	Yes	Promoter	AT2G02220	1633	ATPSKR1	Encodes a protein interacting with phytosulfokine, a five amino acid sulfated peptide (YIYTQ).
510	chr5	19125286	19125676	391	11	-0.85642	-5.58387	0.000503834	0.0325141	Hypomethylated	-27	No	Yes	No	No	Promoter	AT5G47080	1018	CKB1	Regulatory subunit beta of casein kinase II. purified CKB1 resulted in up 100-fold stimulation of casein kinase activity compared with the CKA1 activity alone. Forms a tetrameric complex with CKA1 (CKA1(2)CKB1(2)).
533	chr5	7462288	7462634	347	16	-0.840351	-5.49814	0.000535323	0.0328432	Hypomethylated	-27	No	No	No	Yes	Promoter	AT5G03405	230
585	chr4	6297822	6298510	689	11	-0.847275	-5.29787	0.000626201	0.0232751	Hypomethylated	-27	No	No	No	Yes	Promoter	AT4G10070	1357	AtKH18
613	chr1	25947480	25948214	735	10	-0.84043	-5.151	0.000735416	0.0332695	Hypomethylated	-27	No	No	No	Yes	Promoter	AT1G69030	1126
684	chr1	24294431	24295030	600	21	-0.839592	-5.00039	0.00103559	0.0401842	Hypomethylated	-27	No	No	Yes	Yes	Promoter	AT1G65390	2059	ATPP2-A5
703	chr4	8268054	8268441	388	13	-0.83947	-5.07148	0.00116603	0.0350946	Hypomethylated	-27	No	No	No	Yes	Promoter	AT4G14360	2735
723	chr4	8433436	8434323	888	10	-0.85578	-5.04252	0.00129559	0.0377065	Hypomethylated	-27	No	Yes	No	No	Promoter	AT4G14720	782	PPD2	PPD2 (and its paralog, PPD1) encode plant-specific putative DNA-binding proteins. Deletion of the PPD locus increases leaf lamina size and results in dome-shaped rather than flat leaves. Siliques are also altered in shape because of extra lamina growth.
48	chr5	24124075	24125047	973	33	-0.806857	-7.42181	1.57448e-05	0.00279936	Hypomethylated	-26	No	No	No	Yes	Promoter	AT5G59900	1670
49	chr5	6134810	6135614	805	30	-0.806755	-7.20621	1.57448e-05	0.00279936	Hypomethylated	-26	No	No	No	Yes	Promoter	AT5G18490	1193
130	chr4	4802898	4803755	858	34	-0.83079	-6.87522	4.31863e-05	0.00484472	Hypomethylated	-26	No	No	No	Yes	Promoter	AT4G07960	1892	ATCSLC12	Encodes a gene similar to cellulose synthase
166	chr1	17342242	17343147	906	38	-0.824043	-6.62693	6.00339e-05	0.00927924	Hypomethylated	-26	No	No	No	Yes	Promoter	AT1G47310	0
179	chr5	5028318	5029171	854	23	-0.811881	-6.40422	6.29792e-05	0.00844115	Hypomethylated	-26	No	No	No	Yes	Promoter	AT5G15490	1074	UGD3
213	chr1	18081201	18081613	413	15	-0.808282	-6.44916	7.50424e-05	0.0103872	Hypomethylated	-26	No	No	No	Yes	Promoter	AT1G48880	793	TBL7	Encodes a member of the TBL (TRICHOME BIREFRINGENCE-LIKE) gene family containing a plant-specific DUF231 (domain of unknown function) domain. TBL gene family has 46 members, two of which (TBR/AT5G06700 and TBL3/AT5G01360) have been shown to be involved in the synthesis and deposition of secondary wall cellulose, presumably by influencing the esterification state of pectic polymers. A nomenclature…
248	chr4	8610974	8611596	623	16	-0.811369	-6.13689	0.000107966	0.00854036	Hypomethylated	-26	No	No	No	Yes	Promoter	AT4G15080	1113
309	chr1	27539666	27540088	423	36	-0.830541	-6.04918	0.00019511	0.0181058	Hypomethylated	-26	Yes	No	No	No	Promoter	AT1G73220	1476	AtOCT1
452	chr3	9543205	9543675	471	11	-0.825052	-5.74001	0.000371392	0.0317728	Hypomethylated	-26	No	Yes	No	No	Promoter	AT3G26115	937
675	chr1	24453166	24454122	957	10	-0.807452	-5.0258	0.00099056	0.0395968	Hypomethylated	-26	No	No	No	Yes	Promoter	AT1G65740	0	AtFDA5
729	chr1	25191766	25192285	520	22	-0.82356	-4.88444	0.00139579	0.0483005	Hypomethylated	-26	No	No	No	Yes	Promoter	AT1G67290	955	GLOX1
76	chr3	22366469	22367033	565	42	-0.794414	-9.56084	1.76853e-05	0.0096183	Hypomethylated	-25	No	No	No	Yes	Promoter	AT3G09415	0
132	chr4	2325725	2326516	792	30	-0.780715	-8.08663	4.31863e-05	0.00484472	Hypomethylated	-25	No	No	No	Yes	Promoter	AT4G04610	847	APR	Encodes a protein disulfide isomerase-like (PDIL) protein, a member of a multigene family within the thioredoxin (TRX) superfamily. This protein also belongs to the adenosine 5&apos;-phosphosulfate reductase-like (APRL) group.
151	chr1	22982424	22983286	863	32	-0.786928	-7.22487	4.50254e-05	0.00927924	Hypomethylated	-25	No	No	No	Yes	Promoter	AT1G62200	1073	AtNPF8.5
157	chr5	17170282	17170933	652	31	-0.795178	-6.59181	4.72344e-05	0.00734833	Hypomethylated	-25	No	No	No	Yes	Promoter	AT5G06395	0
253	chr3	9458228	9458846	619	17	-0.80034	-6.92484	0.000123797	0.0241691	Hypomethylated	-25	No	Yes	Yes	No	Promoter	AT3G25850	108
265	chr3	18500691	18501373	683	44	-0.78706	-6.72638	0.000141483	0.0256488	Hypomethylated	-25	No	No	Yes	No	Promoter	AT3G49890	1527
368	chr1	12971034	12971843	810	10	-0.796206	-5.63877	0.000255144	0.0187794	Hypomethylated	-25	No	No	No	Yes	Promoter	AT1G06857	-215
466	chr1	23228326	23228721	396	21	-0.778053	-5.42665	0.00039022	0.0224777	Hypomethylated	-25	No	No	No	Yes	Promoter	AT1G08557	0
567	chr4	9595932	9596548	617	12	-0.797234	-5.31201	0.000583015	0.0220687	Hypomethylated	-25	No	Yes	No	No	Promoter	AT4G17070	1734
609	chr5	17687645	17688044	400	27	-0.769898	-5.28174	0.000724261	0.0380106	Hypomethylated	-25	No	No	No	Yes	Promoter	AT5G43950	624
619	chr3	8681192	8681496	305	15	-0.773054	-5.40127	0.00076047	0.0481697	Hypomethylated	-25	No	Yes	No	No	Promoter	AT3G24040	1793
631	chr4	13736915	13737329	415	21	-0.791577	-5.21527	0.000798946	0.0280085	Hypomethylated	-25	No	No	Yes	No	Promoter	AT4G27480	1586
730	chr1	18686592	18687401	810	11	-0.794066	-4.86662	0.00144081	0.0493067	Hypomethylated	-25	No	No	No	Yes	Promoter	AT1G07633	0
52	chr5	10015679	10016670	992	48	-0.752268	-8.22637	1.57448e-05	0.00279936	Hypomethylated	-24	Yes	Yes	No	No	Promoter	AT5G27990	0
133	chr4	9959052	9959847	796	35	-0.748056	-7.58808	4.31863e-05	0.00484472	Hypomethylated	-24	No	No	Yes	Yes	Promoter	AT4G17915	744
168	chr1	23049006	23049939	934	46	-0.766821	-6.68219	6.00339e-05	0.00927924	Hypomethylated	-24	No	No	Yes	Yes	Promoter	AT1G62330	2238
225	chr5	7631040	7631806	767	30	-0.75524	-6.25892	7.8724e-05	0.00879287	Hypomethylated	-24	No	No	No	Yes	Promoter	AT5G22840	1574	SRPK3
226	chr5	23386824	23387563	740	40	-0.747322	-6.2699	7.8724e-05	0.00879287	Hypomethylated	-24	No	Yes	No	No	Promoter	AT5G57710	2569	SMAX1
257	chr5	4224639	4225361	723	25	-0.767563	-6.14308	0.000125958	0.0124699	Hypomethylated	-24	No	No	No	Yes	Promoter	AT5G13230	2127
258	chr5	22063145	22063827	683	16	-0.752687	-6.09702	0.000125958	0.0124699	Hypomethylated	-24	No	No	No	Yes	Promoter	AT5G54320	340	AtDOB8
272	chr5	3202633	3203506	874	25	-0.746297	-6.05227	0.000173193	0.0150886	Hypomethylated	-24	No	No	No	Yes	Promoter	AT5G10200	1137	SAV4
310	chr1	23000622	23001282	661	20	-0.742819	-5.9899	0.00019511	0.0181058	Hypomethylated	-24	No	No	No	Yes	Promoter	AT1G62262	814	SLAH4	Predicted to encode a protein with similarity to the SLAC1 protein involved in ion homeostasis in guard cells.
349	chr1	26722422	26722729	308	18	-0.759153	-5.78622	0.000240136	0.0181058	Hypomethylated	-24	No	No	No	Yes	Promoter	AT1G70870	-859
409	chr1	19274868	19276131	1264	19	-0.766756	-5.57725	0.000315178	0.0201584	Hypomethylated	-24	No	No	No	Yes	Promoter	AT1G51890	2588
479	chr5	18545118	18545974	857	42	-0.756825	-5.65079	0.000440855	0.0302419	Hypomethylated	-24	No	No	No	Yes	Promoter	AT5G45720	1231
502	chr3	18496628	18497670	1043	31	-0.753467	-5.64384	0.000477504	0.0395187	Hypomethylated	-24	No	Yes	No	No	Promoter	AT3G49880	446	GH43B
545	chr1	3567196	3567684	489	13	-0.746856	-5.29281	0.000555314	0.0282843	Hypomethylated	-24	No	No	Yes	Yes	Promoter	AT1G10730	1939	AP1M1
551	chr3	10163409	10164270	862	12	-0.756521	-5.52296	0.000565931	0.0406509	Hypomethylated	-24	No	No	No	Yes	Promoter	AT3G27470	449
661	chr5	7870801	7871535	735	25	-0.746407	-5.17504	0.000944688	0.0457229	Hypomethylated	-24	No	No	Yes	No	Promoter	AT5G23390	2970
681	chr4	16948350	16948815	466	10	-0.743896	-5.14874	0.00101488	0.0321358	Hypomethylated	-24	No	No	No	Yes	Promoter	AT4G35780	1805	STY17
23	chr1	28883654	28884371	718	46	-0.713706	-8.78144	1.50085e-05	0.00497102	Hypomethylated	-23	Yes	Yes	No	No	Promoter	AT1G76900	2115	AtTLP1	Member of TLP family
105	chr4	11657567	11658047	481	21	-0.721205	-8.70739	2.15931e-05	0.00484472	Hypomethylated	-23	No	No	No	Yes	Promoter	AT4G21990	1058	APR3	Encodes a protein disulfide isomerase-like (PDIL) protein, a member of a multigene family within the thioredoxin (TRX) superfamily. This protein also belongs to the adenosine 5&apos;-phosphosulfate reductase-like (APRL) group.
158	chr5	8951712	8952614	903	33	-0.736685	-6.60764	4.72344e-05	0.00734833	Hypomethylated	-23	No	Yes	No	No	Promoter	AT5G25640	-539
175	chr2	16590227	16590657	431	20	-0.715517	-7.95199	6.08704e-05	0.0221467	Hypomethylated	-23	No	No	No	Yes	Promoter	AT2G39770	1671	CYT1	Encodes a GDP-mannose pyrophosphorylase/ mannose-1-pyrophosphatase. This enzyme provides GDP-mannose, which is used for cell wall carbohydrate biosynthesis and protein glycosylation as well as for ascorbate (vitamin C) biosynthesis. Mutations in this gene confer hypersensitivity to NH4+.
207	chr3	16526938	16528681	1744	40	-0.725339	-7.69212	7.07414e-05	0.016832	Hypomethylated	-23	No	No	No	Yes	Promoter	AT3G45140	1693	ATLOX2	Chloroplast lipoxygenase required for wound-induced jasmonic acid accumulation in Arabidopsis.Mutants are resistant to Staphylococcus aureus and accumulate salicylic acid upon infection.
231	chr4	16252492	16252882	391	21	-0.715153	-6.22278	8.63726e-05	0.00710558	Hypomethylated	-23	No	No	Yes	No	Promoter	AT4G33900	0
238	chr5	33652	34361	710	21	-0.710988	-6.21068	9.44688e-05	0.0104179	Hypomethylated	-23	No	No	Yes	No	Promoter	AT5G01090	872
254	chr3	1284533	1285436	904	34	-0.722341	-6.93842	0.000123797	0.0241691	Hypomethylated	-23	No	Yes	No	No	Promoter	AT3G04717	0
268	chr5	8117359	8118187	829	25	-0.707202	-6.07437	0.000157448	0.0150886	Hypomethylated	-23	No	No	No	Yes	Promoter	AT5G24020	694	ARC11	Encodes a Ca2+ dependent ATPase required for correct positioning of the chloroplast division apparatus. Its ATPase activity is stimulated by AtMinE1, a topological specificity factor.
312	chr1	19489957	19490393	437	21	-0.707184	-5.97323	0.00019511	0.0181058	Hypomethylated	-23	No	No	No	Yes	Promoter	AT1G07803	0
330	chr1	11488651	11489329	679	18	-0.729334	-5.93999	0.000225127	0.0181058	Hypomethylated	-23	No	No	No	Yes	Promoter	AT1G31990	649
367	chr5	6297432	6297762	331	10	-0.734092	-5.87349	0.000251917	0.0207047	Hypomethylated	-23	No	No	No	Yes	Promoter	AT5G18870	-624	NSH5
420	chr4	103032	103558	527	16	-0.731305	-5.63144	0.000323897	0.0161165	Hypomethylated	-23	No	No	No	Yes	Promoter	AT4G00236	964
439	chr4	13824759	13825324	566	13	-0.723537	-5.62109	0.00034549	0.0167848	Hypomethylated	-23	No	No	No	Yes	Promoter	AT4G27690	1249	VPS26B
442	chr5	872320	872902	583	37	-0.722054	-5.7869	0.000346386	0.026241	Hypomethylated	-23	Yes	Yes	No	No	Promoter	AT5G03490	1116	UGT89A2
453	chr3	7539882	7540717	836	11	-0.734224	-5.79299	0.000371392	0.0317728	Hypomethylated	-23	No	No	No	Yes	Promoter	AT3G21420	-667	LBO1
485	chr2	6673545	6674154	610	11	-0.731295	-5.9171	0.000446383	0.0406023	Hypomethylated	-23	No	No	No	Yes	Promoter	AT2G15330	0
542	chr5	8186999	8187377	379	16	-0.722189	-5.47989	0.000551068	0.0331414	Hypomethylated	-23	No	No	No	Yes	Promoter	AT5G24160	-295	SQE6
546	chr1	9980791	9981422	632	17	-0.72237	-5.29454	0.000555314	0.0282843	Hypomethylated	-23	No	No	No	Yes	Promoter	AT1G28420	1313	HB-1
568	chr4	5322682	5323786	1105	14	-0.728645	-5.31491	0.000583015	0.0220687	Hypomethylated	-23	No	No	No	Yes	Promoter	AT4G08400	1586	EXT7
569	chr4	14535828	14536459	632	19	-0.723299	-5.30677	0.000583015	0.0220687	Hypomethylated	-23	No	No	No	Yes	Promoter	AT4G29670	897	ACHT2	Encodes a member of the thioredoxin family protein. Located in the chloroplast. Shows high activity towards the chloroplast 2-Cys peroxiredoxin A, and poor activity towards the chloroplast NADP-malate dehydrogenase.
575	chr2	8328468	8328839	372	17	-0.71668	-5.66998	0.000588414	0.0458753	Hypomethylated	-23	No	No	No	Yes	Promoter	AT2G19190	1105	FRK1	Receptor-like protein kinase. Involved in early defense signaling.
590	chr1	10940094	10940690	597	25	-0.72939	-5.20504	0.000630356	0.0296747	Hypomethylated	-23	No	No	Yes	No	Promoter	AT1G30810	1278	JMJ18
607	chr5	10261168	10261943	776	31	-0.736709	-5.31015	0.000708516	0.0376378	Hypomethylated	-23	No	No	No	Yes	Promoter	AT5G28270	-697
635	chr1	19045995	19046681	687	19	-0.722891	-5.10943	0.000810458	0.0352873	Hypomethylated	-23	No	Yes	Yes	No	Promoter	AT1G51370	936
644	chr1	5205211	5205451	241	10	-0.713137	-5.0704	0.000870492	0.0366952	Hypomethylated	-23	No	No	Yes	Yes	Promoter	AT1G15125	899
647	chr5	21555218	21556016	799	26	-0.719611	-5.20779	0.000881709	0.0444015	Hypomethylated	-23	No	No	No	Yes	Promoter	AT5G53150	1863
717	chr4	18222621	18223244	624	22	-0.737719	-5.04599	0.001274	0.0372538	Hypomethylated	-23	No	No	Yes	No	Promoter	AT4G39110	1994	BUPS1
735	chr4	2372133	2373095	963	13	-0.717936	-5.00737	0.00146833	0.0415579	Hypomethylated	-23	No	No	No	Yes	Promoter	AT4G04680	0
53	chr5	21091309	21092324	1016	43	-0.703367	-6.94522	1.57448e-05	0.00279936	Hypomethylated	-22	No	No	Yes	No	Promoter	AT5G51890	86	Prx66	Encodes peroxidase involved in the lignification of tracheary elements (TE) in roots
134	chr4	11156554	11157054	501	30	-0.69828	-7.26394	4.31863e-05	0.00484472	Hypomethylated	-22	No	Yes	No	No	Promoter	AT4G20830	1101	AtBBE19
135	chr4	7215403	7216055	653	30	-0.69472	-7.44282	4.31863e-05	0.00484472	Hypomethylated	-22	No	No	No	Yes	Promoter	AT4G12040	826	AtSAP7
136	chr4	5197022	5197781	760	27	-0.692783	-6.74041	4.31863e-05	0.00484472	Hypomethylated	-22	No	No	No	Yes	Promoter	AT4G08250	235
137	chr4	8465597	8466451	855	28	-0.678484	-6.67484	4.31863e-05	0.00484472	Hypomethylated	-22	No	No	No	Yes	Promoter	AT4G14746	-1112
214	chr1	17568201	17569092	892	24	-0.689809	-6.4933	7.50424e-05	0.0103872	Hypomethylated	-22	No	No	No	Yes	Promoter	AT1G47740	1690
261	chr4	7608368	7609174	807	27	-0.680781	-6.09485	0.000129559	0.00963106	Hypomethylated	-22	No	No	No	Yes	Promoter	AT4G13030	1127
280	chr3	319962	320747	786	30	-0.689036	-6.57721	0.000176853	0.0269312	Hypomethylated	-22	No	Yes	No	No	Promoter	AT3G01065	0
295	chr2	987706	989747	2042	63	-0.699498	-7.1934	0.000182611	0.0282724	Hypomethylated	-22	No	Yes	Yes	No	Promoter	AT2G03260	946
331	chr1	20755324	20756214	891	22	-0.686957	-5.85452	0.000225127	0.0181058	Hypomethylated	-22	No	Yes	Yes	No	Promoter	AT1G55560	442	sks14
425	chr3	7334270	7334952	683	28	-0.684042	-5.85037	0.000336022	0.0317728	Hypomethylated	-22	No	No	No	Yes	Promoter	AT3G20930	2608	ORRM1
487	chr2	1568759	1569459	701	25	-0.692588	-5.94458	0.000446383	0.0406023	Hypomethylated	-22	No	No	No	Yes	Promoter	AT2G04500	480
515	chr2	6815494	6816084	591	17	-0.678066	-5.8369	0.000507254	0.0425898	Hypomethylated	-22	No	No	No	Yes	Promoter	AT2G15630	1041
528	chr3	21959981	21960592	612	27	-0.693789	-5.60083	0.00053056	0.0406509	Hypomethylated	-22	No	No	No	Yes	Promoter	AT3G59420	2588	ACR4	Encodes a membrane localized protein with similarity to receptor kinases which is involved in epidermal cell differentiation. Flowers of mutants have disorganized ovule integument growth and abnormal sepal margins. In the roots, mutants initiate more lateral roots but fewer laterals actually emerge due to defects in lateral root formation. Mutants also display disorganized columella. The root phe…
587	chr5	10720792	10721489	698	28	-0.675981	-5.35957	0.000629792	0.0351715	Hypomethylated	-22	No	No	No	Yes	Promoter	AT5G28680	872	ANX2	Receptor-like kinase required for maintenance of pollen tube growth. Display polar localization at the plasma membrane of the pollen tube tip.
618	chr5	26477111	26477501	391	19	-0.678115	-5.25746	0.000755751	0.0389592	Hypomethylated	-22	No	Yes	No	No	Promoter	AT5G09595	245
693	chr5	2153564	2154160	597	18	-0.67608	-5.12648	0.00107065	0.0493517	Hypomethylated	-22	No	No	No	Yes	Promoter	AT5G06950	2724	AHBP-1B	Transcription factor of the B-ZIP family that has high affinity for C-box motifs. Interacts with NPR1 and may regulate PR gene expression. Phosphorylated by a CK2-like protein in vitro. Phosphorylation is enhanced by salicylic acid treatment.
696	chr1	20261438	20261872	435	17	-0.693562	-4.98285	0.00111063	0.0423867	Hypomethylated	-22	No	No	No	Yes	Promoter	AT1G54270	1891	EIF4A-2	Member of eIF4A - eukaryotic initiation factor 4A
77	chr3	10525544	10526352	809	29	-0.671489	-22.7173	1.76853e-05	0.0096183	Hypomethylated	-21	No	No	No	Yes	Promoter	AT3G28220	1363
93	chr2	10289628	10290141	514	25	-0.659822	-15.8919	2.02901e-05	0.00781648	Hypomethylated	-21	No	No	No	Yes	Promoter	AT2G24200	0	atLAP1
138	chr4	16290650	16291380	731	28	-0.667985	-6.82574	4.31863e-05	0.00484472	Hypomethylated	-21	No	Yes	Yes	No	Promoter	AT4G33990	1536	EMB2758
139	chr4	9523976	9524430	455	11	-0.661901	-7.63524	4.31863e-05	0.00484472	Hypomethylated	-21	No	No	No	Yes	Promoter	AT4G16920	1261
140	chr4	11042133	11042746	614	38	-0.659717	-7.65334	4.31863e-05	0.00484472	Hypomethylated	-21	Yes	Yes	No	No	Promoter	AT4G20510	476
171	chr1	12277683	12278472	790	15	-0.647808	-6.58152	6.00339e-05	0.00927924	Hypomethylated	-21	No	No	No	Yes	Promoter	AT1G33820	979
191	chr4	9116487	9117936	1450	57	-0.668669	-6.61226	6.47794e-05	0.00562942	Hypomethylated	-21	No	Yes	Yes	No	Promoter	AT4G16120	1443	ATSEB1	Putative membrane-anchored cell wall protein
242	chr1	23090241	23091165	925	36	-0.656614	-6.33989	0.000105059	0.0133469	Hypomethylated	-21	No	No	No	Yes	Promoter	AT1G62400	631	HT1
286	chr1	28077121	28078130	1010	30	-0.660737	-6.12442	0.000180102	0.0181058	Hypomethylated	-21	Yes	Yes	No	No	Promoter	AT1G74720	2194	MCTP15	Encodes a putative transmembrane protein carrying four C(2) domains, suggesting that QKY may function in membrane trafficking in a Ca(2+)-dependent fashion. Mutant analysis shows that this gene is involved in organ development.
297	chr2	17058299	17058957	659	32	-0.671267	-6.97481	0.000182611	0.0282724	Hypomethylated	-21	No	Yes	No	No	Promoter	AT2G40890	1695	CYP98A3	Encodes coumarate 3-hydroxylase (C3H), a P450-dependent monooxygenase. Involved in lignin biosynthesis and flavonoid biosynthesis. Also affects the biosynthesis of coumarins such as scopoletin and scopolin as a branching-out-pathway from the phenylpropanoid acid level.
298	chr2	11275005	11275510	506	25	-0.652469	-6.69161	0.000182611	0.0282724	Hypomethylated	-21	No	No	No	Yes	Promoter	AT2G26510	1163	NAT3	Permease
370	chr1	572354	573147	794	39	-0.657876	-5.64678	0.000255144	0.0187794	Hypomethylated	-21	No	Yes	No	No	Promoter	AT1G02660	1938	PLIP2
398	chr3	16361784	16362488	705	20	-0.659866	-5.93986	0.000300651	0.0301205	Hypomethylated	-21	No	No	No	Yes	Promoter	AT3G44820	2262
410	chr1	22689524	22690080	557	13	-0.672293	-5.57123	0.000315178	0.0201584	Hypomethylated	-21	No	No	No	Yes	Promoter	AT1G61490	0
432	chr1	20369908	20370693	786	26	-0.673874	-5.48794	0.000345195	0.0207879	Hypomethylated	-21	No	No	No	Yes	Promoter	AT1G54550	257
454	chr3	4949564	4950176	613	25	-0.670213	-5.7693	0.000371392	0.0317728	Hypomethylated	-21	No	No	No	Yes	Promoter	AT3G14730	1170
455	chr3	19315251	19315765	515	16	-0.648198	-5.73482	0.000371392	0.0317728	Hypomethylated	-21	No	Yes	No	No	Promoter	AT3G52080	285	chx28	Encodes a cation:proton exchanger expressed in pollen
497	chr4	13719770	13720419	650	22	-0.646652	-5.48423	0.000475049	0.0202933	Hypomethylated	-21	No	No	No	Yes	Promoter	AT4G27430	1763	CIP7	Positive regulator of light-regulated genes. Novel nuclear protein which requires light for its high level expression.
529	chr3	529000	529619	620	22	-0.67235	-5.58882	0.00053056	0.0406509	Hypomethylated	-21	No	No	Yes	No	Promoter	AT3G02530	2993	CCT6-2
552	chr3	16418801	16419695	895	13	-0.670653	-5.53891	0.000565931	0.0406509	Hypomethylated	-21	No	Yes	Yes	No	Promoter	AT3G44950	-1350
560	chr1	19030410	19031142	733	11	-0.647176	-5.28277	0.000570322	0.0282843	Hypomethylated	-21	No	No	No	Yes	Promoter	AT1G51340	0	MATE
586	chr4	17602431	17603257	827	22	-0.662455	-5.29881	0.000626201	0.0232751	Hypomethylated	-21	No	No	Yes	No	Promoter	AT4G37440	1246
605	chr3	16326532	16327447	916	11	-0.6452	-5.42353	0.000707414	0.0476659	Hypomethylated	-21	No	No	No	Yes	Promoter	AT3G44785	1001
624	chr1	25494054	25494414	361	13	-0.656438	-5.12668	0.000765432	0.0339647	Hypomethylated	-21	No	No	No	Yes	Promoter	AT1G68010	861	ATHPR1	Encodes hydroxypyruvate reductase.
636	chr3	17119925	17120872	948	22	-0.654499	-5.32363	0.000813526	0.0499531	Hypomethylated	-21	No	No	No	Yes	Promoter	AT3G46500	0
662	chr5	19368303	19369441	1139	21	-0.666166	-5.17429	0.000944688	0.0457229	Hypomethylated	-21	No	No	No	Yes	Promoter	AT5G47820	2170	FRA1	Encodes a kinesin-like protein with an N-terminal microtubule binding motor domain. Protein is localized to the periphery of the cytoplasm and mutants in the gene exhibit altered orientation of cellulose microfibrils and reduced mechanical strength of fibers.
704	chr4	13822451	13823089	639	19	-0.673955	-5.07525	0.00116603	0.0350946	Hypomethylated	-21	No	No	No	Yes	Promoter	AT4G27680	1432
732	chr1	5839280	5840000	721	17	-0.652594	-4.86267	0.00144081	0.0493067	Hypomethylated	-21	No	No	No	Yes	Promoter	AT1G17070	1690	NTR1
24	chr1	24353294	24354237	944	30	-0.616622	-10.6935	1.50085e-05	0.00497102	Hypomethylated	-20	No	No	No	Yes	Promoter	AT1G65490	-409	STMP5
54	chr5	8968279	8969055	777	30	-0.624256	-9.32565	1.57448e-05	0.00279936	Hypomethylated	-20	No	Yes	No	No	Promoter	AT5G25760	624	APEM7	Mutants displays sucrose-dependent seedling development and reduced lateral root production. PEX4 interacts with PEX22 in a yeast two-hybrid. Necessary for peroxisome biogenesis. The PEX4 and PEX22 pair may be important during the remodeling of peroxisome matrix contents as glyoxysomes transition to leaf peroxisomes.
55	chr5	22900088	22900935	848	28	-0.62071	-7.32658	1.57448e-05	0.00279936	Hypomethylated	-20	No	No	No	Yes	Promoter	AT5G56560	364
172	chr1	24666561	24667802	1242	56	-0.640926	-6.84837	6.00339e-05	0.00927924	Hypomethylated	-20	Yes	Yes	No	No	Promoter	AT1G66210	1048
180	chr5	10722745	10723592	848	35	-0.618423	-6.45982	6.29792e-05	0.00844115	Hypomethylated	-20	No	No	No	Yes	Promoter	AT5G28690	50
193	chr4	10535730	10536229	500	25	-0.613282	-6.56524	6.47794e-05	0.00562942	Hypomethylated	-20	No	Yes	No	No	Promoter	AT4G19260	2434
234	chr3	15647707	15648692	986	33	-0.61689	-7.18336	8.84267e-05	0.0187022	Hypomethylated	-20	No	No	No	Yes	Promoter	AT3G43760	730
249	chr5	22663459	22664411	953	37	-0.625079	-6.1555	0.000110214	0.0117095	Hypomethylated	-20	No	No	No	Yes	Promoter	AT5G55960	927
354	chr1	20787554	20788340	787	23	-0.643288	-5.70142	0.000240136	0.0181058	Hypomethylated	-20	No	No	No	Yes	Promoter	AT1G55620	2868	ATCLC-F	Encodes a chloride channel protein that has been localized to the chloroplast and golgi apparatus. Complements yeast gef1 mutant and therefor may function to acidify the golgi lumen.
378	chr4	13225606	13225981	376	13	-0.638535	-5.72899	0.000259118	0.0144032	Hypomethylated	-20	No	No	No	Yes	Promoter	AT4G26090	1268	RPS2	Encodes a plasma membrane protein with leucine-rich repeat, leucine zipper, and P loop domains that confers resistance to Pseudomonas syringae infection by interacting with the avirulence gene avrRpt2. RPS2 protein interacts directly with plasma membrane associated protein RIN4 and this interaction is disrupted by avrRpt2.
385	chr3	5975034	5975617	584	18	-0.642194	-6.08507	0.00026528	0.0301205	Hypomethylated	-20	No	Yes	Yes	No	Promoter	AT3G17450	594
404	chr5	8750994	8751723	730	27	-0.638818	-5.79764	0.000314896	0.0247151	Hypomethylated	-20	No	No	No	Yes	Promoter	AT5G25250	1314	FLOT1
421	chr4	6142035	6142900	866	14	-0.643204	-5.63352	0.000323897	0.0161165	Hypomethylated	-20	No	No	No	Yes	Promoter	AT4G09740	2103	AtGH9B14
433	chr1	22854633	22855286	654	26	-0.642414	-5.48413	0.000345195	0.0207879	Hypomethylated	-20	No	No	No	Yes	Promoter	AT1G61850	-465	PLAI	Encodes a non-specific lipase that hydrolyzes phospholipids as well as galactolipids, at both sn-1 and sn-2 positions. Involved in basal jasmonic acid biosynthesis by releasing the precursor fatty acid from membrane lipids. Mutant plants were impacted in resistance to fungus B. cinerea.
434	chr1	11587947	11588398	452	25	-0.641097	-5.50698	0.000345195	0.0207879	Hypomethylated	-20	No	No	No	Yes	Promoter	AT1G32180	1253	ATCSLD6	Encodes a gene similar to cellulose synthase
511	chr5	17815012	17815507	496	25	-0.621025	-5.56485	0.000503834	0.0325141	Hypomethylated	-20	No	No	No	Yes	Promoter	AT5G44230	768
527	chr2	14051969	14053127	1159	14	-0.642101	-5.75596	0.000527544	0.0431861	Hypomethylated	-20	No	No	No	Yes	Promoter	AT2G33160	-277	NMA
553	chr3	19357539	19358130	592	10	-0.638084	-5.57778	0.000565931	0.0406509	Hypomethylated	-20	No	No	No	Yes	Promoter	AT3G52190	-278	AtPHF1	Encodes a plant specific protein structurally related to the SEC12 proteins of the early secretory pathway. Mutation of PHF1 impairs Pi transport. Expression was detected in all tissues, and was induced by Pi starvation. Localized in endoplasmic reticulum (ER), and mutation of PHF1 resulted in ER retention and reduced accumulation of the plasma membrane PHT1;1 transporter.
561	chr1	5516936	5517412	477	12	-0.625722	-5.25164	0.000570322	0.0282843	Hypomethylated	-20	No	No	No	Yes	Promoter	AT1G16090	677	WAKL7	WAK-like kinase
598	chr3	3989391	3990480	1090	29	-0.623354	-5.43948	0.000672043	0.0469444	Hypomethylated	-20	No	No	No	Yes	Promoter	AT3G12570	801	FYD
639	chr1	17770668	17771517	850	17	-0.642248	-5.09524	0.000840475	0.0360859	Hypomethylated	-20	No	No	Yes	Yes	Promoter	AT1G48110	1976	ECT7
669	chr5	5499907	5500961	1055	37	-0.631027	-5.16787	0.000960433	0.0457229	Hypomethylated	-20	No	Yes	No	No	Promoter	AT5G16730	2383	MAC
673	chr1	3992350	3992578	229	10	-0.617914	-5.03924	0.000975551	0.0395968	Hypomethylated	-20	No	No	No	Yes	Promoter	AT1G11820	1129	PdBG4
683	chr1	11640886	11641372	487	25	-0.618031	-5.00737	0.00102058	0.0401842	Hypomethylated	-20	No	Yes	No	No	Promoter	AT1G32260	517
700	chr1	28191523	28192043	521	12	-0.620522	-4.96655	0.00114064	0.0430014	Hypomethylated	-20	No	Yes	No	No	Promoter	AT1G75100	2025	AUXILIN-LIKE6	Contains a J-domain at the C-terminus which is similar to the J-domain of auxilin, a clathrin-uncoating factor in cow, yeast and worm. Arabidopsis contains 6 other proteins similar to auxilin. Expressed in leaves and stems, but not in roots. Localized in the cytoplasm. Required for the chloroplast accumulation response, but not for the avoidance response. No molecular function known.
706	chr4	788507	789207	701	25	-0.637059	-5.06329	0.00118762	0.035229	Hypomethylated	-20	No	No	Yes	No	Promoter	AT4G01830	258	ABCB5
321	chr4	12584748	12586059	1312	25	0.620883	5.93639	0.000215931	0.0144032	Hypermethylated	20	No	No	No	Yes	Promoter	AT4G24270	1325	EMB140	A locus involved in embryogenesis. Mutations in this locus result in embryo lethality.
435	chr1	23584001	23584799	799	19	0.623319	5.51747	0.000345195	0.0207879	Hypermethylated	20	No	No	No	Yes	Promoter	AT1G63610	985	DUF760-3
467	chr1	20590922	20591504	583	15	0.627313	5.42763	0.00039022	0.0224777	Hypermethylated	20	No	No	No	Yes	Promoter	AT1G55200	838
507	chr4	7288613	7289298	686	20	0.612824	5.39134	0.000496642	0.0202933	Hypermethylated	20	No	Yes	No	No	Promoter	AT4G12240	810
570	chr4	18287499	18288064	566	11	0.625638	5.32963	0.000583015	0.0220687	Hypermethylated	20	No	No	No	Yes	Promoter	AT4G39300	792
691	chr1	6950009	6950590	582	14	0.631416	4.99361	0.00105059	0.0405967	Hypermethylated	20	No	No	Yes	Yes	Promoter	AT1G20050	966	HYD1	C-8 sterol isomerase
726	chr1	814675	815760	1086	17	0.636174	4.8881	0.00135076	0.0470939	Hypermethylated	20	No	No	No	Yes	Promoter	AT1G03310	1262	AtBE2	Encodes a protein with strong similarity to isoamylase (EC:3.2.1.68) however lacks critical residues known to be important for activity. Appears to co localize with ISA1 in the chloroplast isoamylase complex. Mutations in this gene cause the loss of detectable isoamylase activity and the disruption of normal starch structure. It has been postulated that AtISA2 interacts with AtISA1 to form the Is…
92	chr2	17498843	17499782	940	32	0.670326	10.7722	2.02901e-05	0.00781648	Hypermethylated	21	No	No	No	Yes	Promoter	AT2G41920	0
314	chr1	26188387	26188782	396	11	0.658938	5.98022	0.00019511	0.0181058	Hypermethylated	21	No	No	No	Yes	Promoter	AT1G69610	1674
353	chr1	9717208	9717893	686	16	0.660718	5.7119	0.000240136	0.0181058	Hypermethylated	21	No	No	No	Yes	Promoter	AT1G27900	2697
376	chr4	10262499	10263003	505	18	0.674184	5.81536	0.000259118	0.0144032	Hypermethylated	21	No	Yes	No	No	Promoter	AT4G18640	2899	MDIS2	Required for root hair elongation during tip growth.
377	chr4	941802	942812	1011	23	0.655766	5.87651	0.000259118	0.0144032	Hypermethylated	21	No	No	Yes	Yes	Promoter	AT4G02120	1081	CTPS3
395	chr1	28757881	28758583	703	13	0.671584	5.59064	0.00030017	0.0201584	Hypermethylated	21	No	No	No	Yes	Promoter	AT1G76620	1360	PDE339
411	chr1	12923667	12924366	700	17	0.667432	5.55481	0.000315178	0.0201584	Hypermethylated	21	No	No	No	Yes	Promoter	AT1G06837	662
412	chr1	8200422	8201131	710	18	0.662122	5.56412	0.000315178	0.0201584	Hypermethylated	21	No	No	No	Yes	Promoter	AT1G23130	101
530	chr3	5983292	5983789	498	16	0.672125	5.59023	0.00053056	0.0406509	Hypermethylated	21	No	No	Yes	No	Promoter	AT3G17480	96
591	chr1	20499109	20499848	740	11	0.649809	5.20859	0.000630356	0.0296747	Hypermethylated	21	No	No	No	Yes	Promoter	AT1G54960	0	ANP2	Member of MEKK subfamily
594	chr1	24395377	24396036	660	11	0.666727	5.1909	0.000660373	0.0304692	Hypermethylated	21	No	Yes	No	No	Promoter	AT1G65610	0	ATGH9A2
668	chr5	17051210	17051832	623	10	0.654613	5.16805	0.000960433	0.0457229	Hypermethylated	21	No	No	No	Yes	Promoter	AT5G06325	-1111
159	chr5	9615443	9615983	541	18	0.70571	6.74256	4.72344e-05	0.00734833	Hypermethylated	22	No	No	No	Yes	Promoter	AT5G27280	-1457
296	chr2	10761203	10762844	1642	38	0.688825	6.64813	0.000182611	0.0282724	Hypermethylated	22	No	No	Yes	Yes	Promoter	AT2G08130	0
313	chr1	26718711	26719033	323	10	0.691434	5.98532	0.00019511	0.0181058	Hypermethylated	22	No	No	No	Yes	Promoter	AT1G70860	0
351	chr1	22524171	22525192	1022	15	0.703454	5.76798	0.000240136	0.0181058	Hypermethylated	22	No	No	No	Yes	Promoter	AT1G61120	536	GES	Encodes a geranyllinalool synthase that produces a precursor to TMTT, a volatile plant defense C16-homoterpene. GES transcript levels rise in response to alamethicin, a fungal peptide mixture that damages membranes. This transcriptional response is blocked in JA biosynthetic and JA signaling mutants, but GES transcript levels still rise in response to alamethicin in mutants with salicylic acid an…
369	chr1	10210730	10211368	639	13	0.693537	5.62782	0.000255144	0.0187794	Hypermethylated	22	No	No	No	Yes	Promoter	AT1G29220	1354
391	chr3	16759480	16760221	742	20	0.705082	6.04627	0.000282965	0.0301205	Hypermethylated	22	No	No	No	Yes	Promoter	AT3G45650	603	AtNPF2.7	Encodes a nitrate efflux transporter NAXT1 (for NITRATE EXCRETION TRANSPORTER1). Localized to the plasma membrane. NAXT1 belongs to a subclass of seven NAXT members from the large NITRATE TRANSPORTER1/PEPTIDE TRANSPORTER family and is mainly expressed in the cortex of mature roots.
520	chr5	23265538	23266288	751	19	0.700716	5.55006	0.000519579	0.0328432	Hypermethylated	22	No	No	No	Yes	Promoter	AT5G57410	1595
564	chr5	9280973	9281564	592	13	0.684158	5.41264	0.000582558	0.0331715	Hypermethylated	22	No	No	No	Yes	Promoter	AT5G26692	-915		Encodes a Plant thionin family protein
610	chr3	9706810	9707705	896	11	0.694197	5.40726	0.000725099	0.0481697	Hypermethylated	22	No	Yes	Yes	No	Promoter	AT3G05025	0
632	chr4	11779852	11780882	1031	12	0.690528	5.23532	0.000798946	0.0280085	Hypermethylated	22	No	No	No	Yes	Promoter	AT4G22285	1813
638	chr5	14620052	14620880	829	15	0.697068	5.23128	0.000834475	0.0425143	Hypermethylated	22	No	No	No	Yes	Promoter	AT5G37000	2175
714	chr1	12020275	12021645	1371	17	0.695782	4.93305	0.0012457	0.044952	Hypermethylated	22	No	Yes	Yes	No	Promoter	AT1G33140	-1580	PGY2	Encodes ribosomal protein L9. Identified in a screen for enhancers of as1. as1/pgy double mutants show defects in leaf vascular patterning and adaxial cell fate. Double mutant analysis indicates pgy genes function in the same pathway as REV, KAN1 and KAN2.
737	chr4	6229417	6229964	548	11	0.688452	4.99051	0.00153311	0.0424706	Hypermethylated	22	No	No	No	Yes	Promoter	AT4G09930	861	IAN11
749	chr4	12691278	12691937	660	11	0.690009	4.87281	0.0019002	0.0492614	Hypermethylated	22	No	No	Yes	Yes	Promoter	AT4G24580	2491	REN1	Encodes a Rho GTPase-activating protein that interacts with ROP1 (a Rho GTPase) and regulates pollen tube development. This protein can be observed at the apical tip of growing pollen tubes and on endocytic vesicles traveling to this region of the pollen tube.
350	chr1	13055419	13055756	338	10	0.737825	5.74545	0.000240136	0.0181058	Hypermethylated	23	No	No	No	Yes	Promoter	AT1G35480	608
486	chr2	1857992	1860114	2123	37	0.725262	6.09552	0.000446383	0.0406023	Hypermethylated	23	No	No	No	Yes	Promoter	AT2G05160	1820	AtC3H18
490	chr1	20999048	20999672	625	15	0.713486	5.39234	0.000450254	0.0256175	Hypermethylated	23	No	No	No	Yes	Promoter	AT1G56130	966	IGP2
707	chr1	19130195	19130832	638	13	0.734094	4.95322	0.00120068	0.0447392	Hypermethylated	23	No	No	No	Yes	Promoter	AT1G51590	1486	MANIB	Encodes an alpha-mannosidase I enzyme responsible for N-glycan maturation.
716	chr1	21733660	21734430	771	11	0.719053	4.92621	0.00126071	0.0451566	Hypermethylated	23	No	No	No	Yes	Promoter	AT1G58520	1094	OSCA2.1
741	chr4	12716631	12717076	446	14	0.716713	4.95537	0.0015763	0.0424706	Hypermethylated	23	No	Yes	Yes	No	Promoter	AT4G24630	2007
329	chr1	25370236	25371458	1223	16	0.750954	5.88468	0.000225127	0.0181058	Hypermethylated	24	No	No	No	Yes	Promoter	AT1G67690	1362	PSPM3
366	chr5	8614886	8615774	889	11	0.767393	5.87907	0.000251917	0.0207047	Hypermethylated	24	No	Yes	No	No	Promoter	AT5G25010	-4
493	chr3	23414310	23415047	738	19	0.768369	5.64673	0.000459819	0.0384732	Hypermethylated	24	No	Yes	Yes	No	Promoter	AT3G63400	2286
563	chr5	16665699	16666148	450	13	0.739583	5.39614	0.000582558	0.0331715	Hypermethylated	24	No	Yes	No	No	Promoter	AT5G41670	1023	PGD3
718	chr1	29013874	29014750	877	11	0.751271	4.9166	0.00127572	0.0451566	Hypermethylated	24	No	No	Yes	Yes	Promoter	AT1G77220	1200	LAZ1H1
740	chr4	17685032	17685371	340	12	0.754396	4.97657	0.0015763	0.0424706	Hypermethylated	24	No	No	No	Yes	Promoter	AT4G37640	1734	ACA2	Encodes a calmodulin-regulated Ca(2+)-pump located in the endoplasmic reticulum. Belongs to plant 2B ATPase&apos;s with an N-terminal autoinhibitor.
271	chr5	16807999	16808727	729	21	0.795744	5.97125	0.000173193	0.0150886	Hypermethylated	25	No	No	No	Yes	Promoter	AT5G42020	1966	BIP	Luminal binding protein (BiP2) involved in polar nuclei fusion during proliferation of endosperm nuclei.
317	chr2	7885184	7885542	359	11	0.794187	6.54482	0.000202901	0.0282724	Hypermethylated	25	No	No	No	Yes	Promoter	AT2G18130	-1249	ATPAP11
384	chr3	2649566	2650177	612	13	0.794157	6.12224	0.00026528	0.0301205	Hypermethylated	25	No	No	No	Yes	Promoter	AT3G08720	1054	ATPK19	Encodes a ribosomal-protein S6 kinase. Gene expression is induced by cold and salt (NaCl). Activation of AtS6k is regulated by 1-naphthylacetic acid and kinetin, at least in part, via a lipid kinase-dependent pathway. Phosphorylates specifically mammalian and plant S6 at 25 degrees C but not at 37 degrees C. Involved in translational up-regulation of ribosomal proteins.
390	chr3	15170498	15171197	700	22	0.773939	6.04765	0.000282965	0.0301205	Hypermethylated	25	No	No	Yes	No	Promoter	AT3G06555	0
408	chr1	23607752	23608320	569	20	0.78196	5.57112	0.000315178	0.0201584	Hypermethylated	25	No	Yes	No	No	Promoter	AT1G63670	2457	TRM12
448	chr2	7333751	7334903	1153	27	0.781969	6.19608	0.000365223	0.0405397	Hypermethylated	25	No	No	No	Yes	Promoter	AT2G06795	0
614	chr5	9143876	9144351	476	12	0.799232	5.26978	0.000740006	0.0383746	Hypermethylated	25	No	No	No	Yes	Promoter	AT5G26160	1011	PMIR2
626	chr3	19002863	19003602	740	16	0.78095	5.34724	0.000778155	0.0481697	Hypermethylated	25	No	No	No	Yes	Promoter	AT3G51150	2186
731	chr1	18904384	18904848	465	11	0.780133	4.86773	0.00144081	0.0493067	Hypermethylated	25	No	No	No	Yes	Promoter	AT1G50990	1706	BSK11
131	chr4	14490096	14491138	1043	22	0.810524	6.88282	4.31863e-05	0.00484472	Hypermethylated	26	No	No	No	Yes	Promoter	AT4G29490	2213
167	chr1	7446417	7446967	551	14	0.817073	6.69263	6.00339e-05	0.00927924	Hypermethylated	26	No	No	No	Yes	Promoter	AT1G21270	1668	WAK2	Cytoplasmic serine/threonine protein kinase induced by salicylic acid. mutant plants exhibit a loss of cell expansion and dependence on sugars and salts for seedling growth, affecting the expression and activity of vacuolar invertase.
206	chr3	13331136	13332882	1747	16	0.802743	7.37031	7.07414e-05	0.016832	Hypermethylated	26	No	No	No	Yes	Promoter	AT3G32389	-886
233	chr3	7902016	7902809	794	24	0.82361	7.18833	8.84267e-05	0.0187022	Hypermethylated	26	No	No	No	Yes	Promoter	AT3G22350	111
303	chr4	8077269	8077843	575	14	0.824071	6.05073	0.000194338	0.0141067	Hypermethylated	26	No	No	No	Yes	Promoter	AT4G13980	1565	AT-HSFA5	Member of Heat Stress Transcription Factor (Hsf) family
339	chr5	5119433	5120514	1082	16	0.815754	5.90496	0.000236172	0.019784	Hypermethylated	26	No	No	No	Yes	Promoter	AT5G15700	1327		Nucleus encoded plastid RNA polymerase. Localized in mitochondria and chloroplast.
534	chr5	15435557	15436227	671	16	0.803793	5.51671	0.000535323	0.0328432	Hypermethylated	26	No	No	No	Yes	Promoter	AT5G38550	0
649	chr1	21090371	21091185	815	14	0.821763	5.06254	0.0008855	0.0369916	Hypermethylated	26	No	No	No	Yes	Promoter	AT1G56340	1524	AtCRT1a	Encodes one of three Arabidopsis calreticulins. In CRT-deficient mouse fibroblasts, this protein restores ER Ca2+ levels.
736	chr4	12596433	12596974	542	14	0.82592	4.99243	0.00153311	0.0424706	Hypermethylated	26	No	No	No	Yes	Promoter	AT4G24290	2388	MACP2
165	chr1	11041077	11042402	1326	20	0.846305	6.93015	6.00339e-05	0.00927924	Hypermethylated	27	No	No	No	Yes	Promoter	AT1G30970	1349	SUF4	Encodes SUF4 (SUPPRESSOR of FRI 4), a putative zinc-finger-containing transcription factor that is required for delayed flowering in winter-annual Arabidopsis. suf4 mutations strongly suppress the late-flowering phenotype of FRI (FRIGIDA) mutants. suf4 mutants also show reduced H3K4 trimethylation at FLC (FLOWERING LOCUS C), a floral inhibitor. SUF4 may act to specifically recruit a putative hist…
188	chr4	10083399	10084215	817	19	0.838614	6.57658	6.47794e-05	0.00562942	Hypermethylated	27	No	No	No	Yes	Promoter	AT4G18240	1291	ATSS4
224	chr5	15141230	15141781	552	11	0.833952	6.25374	7.8724e-05	0.00879287	Hypermethylated	27	No	No	No	Yes	Promoter	AT5G38000	0
308	chr1	11140016	11140650	635	10	0.8462	6.09773	0.00019511	0.0181058	Hypermethylated	27	Yes	Yes	No	No	Promoter	AT1G06417	0
407	chr1	10016825	10017493	669	14	0.839415	5.56578	0.000315178	0.0201584	Hypermethylated	27	No	No	No	Yes	Promoter	AT1G28490	969	ATSYP61	Encodes one of 24 Arabidopsis syntaxins. Its mRNA has been shown to be expressed.
523	chr1	26760703	26761001	299	10	0.855476	5.34342	0.000525297	0.0282843	Hypermethylated	27	No	No	No	Yes	Promoter	AT1G70970	869
606	chr5	10318463	10319164	702	26	0.844736	5.30192	0.000708516	0.0376378	Hypermethylated	27	Yes	Yes	No	No	Promoter	AT5G28345	696
91	chr2	9056509	9057262	754	12	0.875431	8.82522	2.02901e-05	0.00781648	Hypermethylated	28	No	Yes	No	No	Promoter	AT2G21130	-28
187	chr4	5973250	5973742	493	11	0.894754	6.51889	6.47794e-05	0.00562942	Hypermethylated	28	No	No	No	Yes	Promoter	AT4G09432	1453
259	chr4	9767159	9767619	461	11	0.879217	6.11302	0.000129559	0.00963106	Hypermethylated	28	No	No	No	Yes	Promoter	AT4G17510	1212	UCH3
316	chr2	9850361	9851240	880	11	0.879357	6.53221	0.000202901	0.0282724	Hypermethylated	28	No	No	No	Yes	Promoter	AT2G07885	325
550	chr3	16474546	16474964	419	10	0.873829	5.54275	0.000565931	0.0406509	Hypermethylated	28	No	No	Yes	Yes	Promoter	AT3G45040	818	AtDOK1	Encodes a putative dolichol kinase.
581	chr2	8417052	8417787	736	11	0.892761	5.62867	0.000608704	0.0463536	Hypermethylated	28	No	No	No	Yes	Promoter	AT2G19430	2006	AtTHO6	This gene is predicted to encode a protein with a DWD motif. It can bind to DDB1a in Y2H assays, and DDB1b in co-IP assays, and may be involved in the formation of a CUL4-based E3 ubiquitin ligase. Encodes a component of the putative Arabidopsis THO/TREX complex: THO1 or HPR1 (At5g09860), THO2 (At1g24706), THO3 or TEX1 (At5g56130), THO5 (At5g42920, At1g45233), THO6 (At2g19430), and THO7 (At5g1679…
600	chr5	4503920	4504644	725	10	0.877002	5.32917	0.000677027	0.037096	Hypermethylated	28	No	No	No	Yes	Promoter	AT5G13960	2558	KYP	Encodes a histone 3 lysine 9 specific methyltransferase involved in the maintenance of DNA methylation. SUVH4/KYP is a SU(VAR)3-9 homolog, a SET domain protein. Known SET domain proteins are involved in epigenetic control of gene expression. There are 10 SUVH genes in Arabidopsis and members of this subfamily of the SET proteins have an additional conserved SRA domain. In kyp mutants, there is a …
665	chr4	8982933	8983740	808	15	0.880765	5.16313	0.000950098	0.0310164	Hypermethylated	28	No	Yes	Yes	No	Promoter	AT4G15790	750
688	chr4	2441801	2442204	404	12	0.866982	5.1252	0.00103647	0.0321358	Hypermethylated	28	No	No	No	Yes	Promoter	AT4G04810	560	ATMSRB4
697	chr4	17827133	17827577	445	15	0.895184	5.08885	0.00112284	0.0344674	Hypermethylated	28	No	No	No	Yes	Promoter	AT4G37910	615	HSP70-9
160	chr3	17725565	17726875	1311	25	0.923089	8.38294	5.3056e-05	0.016832	Hypermethylated	29	No	Yes	No	No	Promoter	AT3G48030	1079	AtHIGD1
205	chr3	9718861	9719569	709	16	0.911408	7.3886	7.07414e-05	0.016832	Hypermethylated	29	No	No	No	Yes	Promoter	AT3G05045	0
327	chr1	21126857	21128049	1193	11	0.900103	5.84457	0.000225127	0.0181058	Hypermethylated	29	No	Yes	No	No	Promoter	AT1G56423	-863
558	chr1	4506619	4507339	721	12	0.89633	5.27602	0.000570322	0.0282843	Hypermethylated	29	No	No	No	Yes	Promoter	AT1G13200	1189
603	chr1	17926311	17926978	668	27	0.915367	5.16876	0.00069039	0.0315403	Hypermethylated	29	No	No	No	Yes	Promoter	AT1G48490	1976	IRE3
304	chr3	6620902	6621672	771	11	0.933066	6.46352	0.000194539	0.0279475	Hypermethylated	30	No	No	No	Yes	Promoter	AT3G19160	1606	ATIPT8	Encodes cytokinin synthase.
465	chr3	2724011	2725055	1045	14	0.939953	5.6855	0.000389078	0.032916	Hypermethylated	30	No	No	No	Yes	Promoter	AT3G08947	858
43	chr5	13882909	13883936	1028	12	0.975059	7.49567	1.57448e-05	0.00279936	Hypermethylated	31	No	No	No	Yes	Promoter	AT5G35715	1687	CYP71B8	Encodes a protein with cytochrome P450 domain
44	chr5	19872402	19873288	887	22	0.962361	8.64489	1.57448e-05	0.00279936	Hypermethylated	31	No	No	No	Yes	Promoter	AT5G49020	1211	ATPRMT4A	Encodes a type I protein arginine methyltransferase. PRMT4a can catalyze the asymmetric dimethylation of arginines 2,17, and 26 on histone 3 and can also methylate myelin basic protein in vitro. Double mutants lacking PRMT4a and 4b have reduced levels of histone 3 methylated at R17. These double mutants flower late due to defects in the autonomous pathway and they have elevated levels of FLC tran…
156	chr5	7954429	7954921	493	15	0.961655	6.80571	4.72344e-05	0.00734833	Hypermethylated	31	No	No	No	Yes	Promoter	AT5G23590	701
278	chr3	17571840	17572227	388	11	0.98201	6.66424	0.000176853	0.0269312	Hypermethylated	31	No	No	No	Yes	Promoter	AT3G47660	0	PRAF2
291	chr2	9735066	9735820	755	10	0.975208	7.25261	0.000182611	0.0282724	Hypermethylated	31	No	No	No	Yes	Promoter	AT2G22850	-1454	AtbZIP6
326	chr1	7876692	7877567	876	12	0.96448	5.80228	0.000225127	0.0181058	Hypermethylated	31	No	No	No	Yes	Promoter	AT1G22290	395
340	chr4	12165115	12165294	180	10	0.969815	5.87987	0.000237525	0.0144032	Hypermethylated	31	No	No	No	Yes	Promoter	AT4G23250	1732	CRK17
519	chr4	887264	887910	647	12	0.980649	5.36879	0.000518235	0.0208988	Hypermethylated	31	No	No	No	Yes	Promoter	AT4G02020	684	EZA1	Encodes a polycomb group protein. Forms part of a large protein complex that can include VRN2 (VERNALIZATION 2), VIN3 (VERNALIZATION INSENSITIVE 3) and polycomb group proteins FERTILIZATION INDEPENDENT ENDOSPERM (FIE) and CURLY LEAF (CLF). The complex has a role in establishing FLC (FLOWERING LOCUS C) repression during vernalization. Performs a partially redundant role to MEA in controlling seed …
572	chr1	4502158	4502653	496	13	0.970585	5.24222	0.000585331	0.0285703	Hypermethylated	31	No	No	No	Yes	Promoter	AT1G13195	890
702	chr4	15143990	15144437	448	12	0.977586	5.07689	0.00116603	0.0350946	Hypermethylated	31	No	No	No	Yes	Promoter	AT4G31150	1203
734	chr4	343930	344511	582	12	0.961381	5.00861	0.00146833	0.0415579	Hypermethylated	31	No	No	No	Yes	Promoter	AT4G00800	1274	SETH5
219	chr5	17497930	17498452	523	12	1.01244	6.25432	7.8724e-05	0.00879287	Hypermethylated	32	No	Yes	No	No	Promoter	AT5G43550	38
347	chr1	26022749	26023303	555	10	1.01533	5.76221	0.000240136	0.0181058	Hypermethylated	32	No	No	No	Yes	Promoter	AT1G69220	2868	SIK1	Encodes a putative serine/threonine kinase (SIK1).
458	chr1	12060317	12060757	441	11	0.990921	5.4396	0.000375212	0.021885	Hypermethylated	32	No	Yes	No	No	Promoter	AT1G33250	-525
612	chr1	2764378	2765149	772	16	0.99745	5.1554	0.000735416	0.0332695	Hypermethylated	32	No	No	No	Yes	Promoter	AT1G08680	1794	AGD14	A member of ARF GAP domain (AGD), A thaliana has 15 members, grouped into four classes. AGD14 belongs to the class 4, together with AGD15.
748	chr4	7551581	7551971	391	13	1.01458	4.90374	0.00185701	0.0485498	Hypermethylated	32	No	No	No	Yes	Promoter	AT4G12910	1404	scpl20
212	chr1	21416286	21416727	442	10	1.05173	6.49466	7.50424e-05	0.0103872	Hypermethylated	33	No	Yes	No	No	Promoter	AT1G57820	1388	ORTH2	Encodes a 645-amino acid methylcytosine-binding protein with a PHD domain, two RING finger domains, and an SRA domain that is involved in centromere heterochromatinization. This protein functions as an E3 ubiquitin ligase in vitro. The protein has been shown to bind to methylated cytosines of CG, CNG and CNN motifs via its SRA domain but has a preference for the former. It plays a role in the est…
580	chr2	17912481	17912999	519	11	1.03996	5.62796	0.000608704	0.0463536	Hypermethylated	33	No	No	No	Yes	Promoter	AT2G43070	1891	ATSPPL3
267	chr5	3627971	3628723	753	27	1.06805	6.09248	0.000141703	0.013871	Hypermethylated	34	No	No	No	Yes	Promoter	AT5G11370	122
393	chr1	19171525	19172088	564	12	1.07108	5.59784	0.000285161	0.0201584	Hypermethylated	34	No	No	Yes	No	Promoter	AT1G07763	0
402	chr4	15112173	15112680	508	10	1.06179	5.70664	0.000302304	0.015942	Hypermethylated	34	No	No	Yes	No	Promoter	AT4G31040	1446	DLDG1
18	chr1	19420268	19420494	227	10	1.09262	8.21839	1.50085e-05	0.00497102	Hypermethylated	35	No	No	No	Yes	Promoter	AT1G52155	2834
37	chr5	17670835	17671278	444	12	1.1222	12.509	1.57448e-05	0.00279936	Hypermethylated	36	No	No	No	Yes	Promoter	AT5G43910	-543
102	chr4	5437651	5438616	966	13	1.15129	9.26956	2.15931e-05	0.00484472	Hypermethylated	37	No	No	No	Yes	Promoter	AT4G08545	1051
161	chr1	12548822	12549713	892	10	1.16299	6.78927	6.00339e-05	0.00927924	Hypermethylated	37	No	No	No	Yes	Promoter	AT1G34370	-626	AtSTOP1	Encodes a putative nuclear Cys(2)His(2)-type zinc finger protein involved in H+ and Al3+ rhizotoxicity. In mutants exposed to aluminum stress, there is no induction of AtALMT1, an malate transporter known to be involved in the mediation of aluminum toxicity.
200	chr3	11100068	11100774	707	10	1.16888	7.75603	7.07414e-05	0.016832	Hypermethylated	37	No	No	No	Yes	Promoter	AT3G29130	2735
218	chr5	20057371	20057890	520	11	1.17703	6.3667	7.8724e-05	0.00879287	Hypermethylated	37	No	No	No	Yes	Promoter	AT5G49460	2870	ACLB-2	One of the two genes encoding subunit B of the cytosolic enzyme ATP Citrate Lyase (ACL)
364	chr3	11097266	11098031	766	20	1.15039	6.19696	0.000247595	0.0301205	Hypermethylated	37	No	No	No	Yes	Promoter	AT3G29120	-474
637	chr1	5179518	5179848	331	11	1.17589	5.10003	0.000825466	0.0357728	Hypermethylated	37	No	Yes	No	No	Promoter	AT1G15030	2014		Encodes a Cysteine-rich peptide (CRP) family protein
405	chr1	21026135	21026532	398	10	1.18007	5.5785	0.000315178	0.0201584	Hypermethylated	38	No	Yes	Yes	No	Promoter	AT1G56180	1533	VIR3
118	chr4	6766435	6767169	735	11	1.21182	7.75111	4.31863e-05	0.00484472	Hypermethylated	39	No	No	No	Yes	Promoter	AT4G11090	-106	MOAT1	Encodes a member of the TBL (TRICHOME BIREFRINGENCE-LIKE) gene family containing a plant-specific DUF231 (domain of unknown function) domain. TBL gene family has 46 members, two of which (TBR/AT5G06700 and TBL3/AT5G01360) have been shown to be involved in the synthesis and deposition of secondary wall cellulose, presumably by influencing the esterification state of pectic polymers. A nomenclature…
184	chr4	53149	53516	368	24	1.24105	6.56187	6.47794e-05	0.00562942	Hypermethylated	40	No	Yes	No	No	Promoter	AT4G00140	0	EDA34
14	chr1	27932858	27933802	945	15	1.2881	12.677	1.50085e-05	0.00497102	Hypermethylated	41	No	No	No	Yes	Promoter	AT1G74290	1022
150	chr1	25343884	25344632	749	32	1.27708	7.32396	4.50254e-05	0.00927924	Hypermethylated	41	Yes	Yes	No	No	Promoter	AT1G67626	0
73	chr3	16532041	16533023	983	16	1.35084	12.7585	1.76853e-05	0.0096183	Hypermethylated	43	No	No	No	Yes	Promoter	AT3G45150	862	TCP16
85	chr2	19320222	19320769	548	19	1.37271	11.7599	2.02901e-05	0.00781648	Hypermethylated	44	No	Yes	No	No	Promoter	AT2G47020	1677
211	chr1	21095819	21096373	555	15	1.39607	6.4708	7.50424e-05	0.0103872	Hypermethylated	44	No	Yes	No	No	Promoter	AT1G56350	1076
84	chr2	8956376	8956841	466	10	1.42159	10.5459	2.02901e-05	0.00781648	Hypermethylated	45	No	No	No	Yes	Promoter	AT2G20805	207
149	chr1	24940650	24941189	540	10	1.40458	7.5165	4.50254e-05	0.00927924	Hypermethylated	45	No	No	No	Yes	Promoter	AT1G66855	-637
288	chr2	9333113	9333915	803	20	1.45598	6.77057	0.000182611	0.0282724	Hypermethylated	46	No	No	No	Yes	Promoter	AT2G21895	0
6	chr1	21858004	21858629	626	13	1.48034	11.9879	1.50085e-05	0.00497102	Hypermethylated	47	No	No	No	Yes	Promoter	AT1G08253	684
7	chr1	16491823	16492726	904	14	1.4766	14.4685	1.50085e-05	0.00497102	Hypermethylated	47	No	No	No	Yes	Promoter	AT1G43715	-484
34	chr5	15430638	15431550	913	22	1.4745	8.50174	1.57448e-05	0.00279936	Hypermethylated	47	No	No	No	Yes	Promoter	AT5G38540	0
83	chr2	14653118	14654088	971	13	1.47701	10.3794	2.02901e-05	0.00781648	Hypermethylated	47	No	No	No	Yes	Promoter	AT2G34730	-69
538	chr1	8452261	8452967	707	11	1.51044	5.3149	0.000540305	0.0282843	Hypermethylated	48	No	No	No	Yes	Promoter	AT1G23910	-972
269	chr1	20509672	20510222	551	10	1.5681	6.23365	0.000165093	0.0181058	Hypermethylated	50	No	No	No	Yes	Promoter	AT1G54985	0
155	chr5	15623632	15624126	495	13	1.59425	6.65805	4.72344e-05	0.00734833	Hypermethylated	51	No	No	No	Yes	Promoter	AT5G39040	-1334	ABCB27	Encodes a member of TAP subfamily of ABC transporters that is located in the vacuole. Mutants are hypersensitive to aluminum and the gene product may be important for intracellular movement of some substrate, possibly chelated Al, as part of a mechanism of aluminum sequestration.
71	chr3	11584989	11586363	1375	24	1.71154	14.9585	1.76853e-05	0.0096183	Hypermethylated	54	No	No	No	Yes	Promoter	AT3G05955	185
4	chr1	28515048	28516074	1027	44	1.89856	14.6557	1.50085e-05	0.00497102	Hypermethylated	60	No	Yes	No	No	Promoter	AT1G75945	0
70	chr3	3120225	3120469	245	14	1.92271	26.2794	1.76853e-05	0.0096183	Hypermethylated	61	No	No	Yes	No	Promoter	AT3G10114	734
95	chr4	2309165	2310568	1404	25	2.03978	24.6888	2.15931e-05	0.00484472	Hypermethylated	65	No	No	No	Yes	Promoter	AT4G04601	0
2	chr1	13353597	13354670	1074	22	2.06497	60.5671	1.50085e-05	0.00497102	Hypermethylated	66	No	No	No	Yes	Promoter	AT1G35895	0
28	chr5	18779966	18780349	384	12	2.12137	45.5167	1.57448e-05	0.00279936	Hypermethylated	68	No	No	No	Yes	Promoter	AT5G46295	0
68	chr3	16584321	16584848	528	17	2.16861	53.5313	1.76853e-05	0.0096183	Hypermethylated	69	No	No	No	Yes	Promoter	AT3G45250	598
1	chr1	11407058	11407573	516	11	2.18775	53.4087	1.50085e-05	0.00497102	Hypermethylated	70	No	No	No	Yes	Promoter	AT1G31810	-249	AFH14	Encodes the Type II Arabidopsis formin14. Interacts with microtubules and microfilaments to regulate cell division.

## Sheet: CHG
Index	chr	start	end	width	CpGs	betaCoefficient	statistic	p.value	q.value	direction	difference	CpG.Island	CpG.Shore	CpG.Shelf	Open.Sea	annotation	geneId	distanceToTSS	geneSymbol	gene
3	chr5	10929852	10930805	954	67	-1.14732	-14.8206	3.05483e-05	0.00514045	Hypomethylated	-37	No	No	No	Yes	3&apos; UTR	AT5G28900	4217
100	chr3	11100067	11100416	350	14	0.669868	6.84268	0.00199614	0.036537	Hypermethylated	21	No	No	No	Yes	3&apos; UTR	AT3G29130	3093
35	chr4	6281657	6282404	748	29	-0.931097	-14.6802	3.76294e-05	0.00397393	Hypomethylated	-30	No	No	No	Yes	Distal Intergenic	AT4G10040	4709	CYTC-2	Encodes cytochrome c. Promoter directs preferential expression in vascular tissues of cotyledons, leaves, roots, and hypocotyls, and in anthers.
12	chr2	6178888	6179587	700	31	0.909776	13.106	3.11944e-05	0.00672136	Hypermethylated	29	No	No	No	Yes	Distal Intergenic	AT2G14510	-3793
45	chr3	383	678	296	11	1.46554	14.9465	6.43915e-05	0.00820496	Hypermethylated	47	No	No	No	Yes	Distal Intergenic	AT3G01015	3481	MD60
17	chr1	25723553	25724151	599	30	-0.938656	-16.5423	3.18228e-05	0.0026167	Hypomethylated	-30	No	No	No	Yes	Downstream	AT1G68550	3235	CRF10	Encodes a member of the ERF (ethylene response factor) subfamily B-6 of ERF/AP2 transcription factor family. The protein contains one AP2 domain. There are 12 members in this subfamily including RAP2.11.
57	chr2	6538106	6538748	643	17	0.786368	11.4317	9.35833e-05	0.00945191	Hypermethylated	25	No	No	No	Yes	Downstream	AT2G15090	-3418	KCS8	Encodes KCS8, a member of the 3-ketoacyl-CoA synthase family involved in the biosynthesis of VLCFA (very long chain fatty acids).
84	chr1	7973649	7974688	1040	61	-0.625636	-7.57106	0.000477342	0.0119105	Hypomethylated	-20	No	No	No	Yes	Exon	AT1G22560	3401
31	chr4	13377377	13377723	347	11	-1.84759	-14.4564	3.76294e-05	0.00397393	Hypomethylated	-59	No	No	No	Yes	Promoter	AT4G26485	781
38	chr5	17877939	17878400	462	10	-1.65623	-9.42704	6.10967e-05	0.00646228	Hypomethylated	-53	No	No	No	Yes	Promoter	AT5G44375	-187
2	chr5	19829692	19830377	686	51	-1.4133	-21.6635	3.05483e-05	0.00514045	Hypomethylated	-45	No	No	No	Yes	Promoter	AT5G07295	0
95	chr5	3629186	3629586	401	14	-1.41264	-6.8488	0.00128303	0.0337286	Hypomethylated	-45	No	No	No	Yes	Promoter	AT5G11370	1337
30	chr3	15776930	15777539	610	27	-1.31971	-25.2102	3.21958e-05	0.00820496	Hypomethylated	-42	No	No	No	Yes	Promoter	AT3G43970	457
32	chr4	5987206	5988580	1375	80	-1.29762	-22.6479	3.76294e-05	0.00397393	Hypomethylated	-41	No	No	No	Yes	Promoter	AT4G09455	0
10	chr2	7632780	7633721	942	35	-1.23987	-22.5067	3.11944e-05	0.00672136	Hypomethylated	-39	No	Yes	Yes	No	Promoter	AT2G06995	0
33	chr4	8087771	8088809	1039	39	-1.23392	-22.9083	3.76294e-05	0.00397393	Hypomethylated	-39	No	No	No	Yes	Promoter	AT4G13992	461
64	chr2	12773675	12774325	651	39	-1.13921	-11.2582	0.000124778	0.0107256	Hypomethylated	-36	No	No	No	Yes	Promoter	AT2G08355	449
11	chr2	17362922	17363719	798	30	-1.09235	-13.6235	3.11944e-05	0.00672136	Hypomethylated	-35	No	No	No	Yes	Promoter	AT2G41640	2503	GT61
48	chr3	1559185	1560742	1558	108	-1.03278	-16.0833	6.43915e-05	0.00820496	Hypomethylated	-33	No	No	No	Yes	Promoter	AT3G05415	0
59	chr3	21547307	21547929	623	20	-1.04088	-11.6334	9.65873e-05	0.00820496	Hypomethylated	-33	No	No	No	Yes	Promoter	AT3G58190	1643	ASL16	This gene contains two auxin-responsive element (AuxRE).
4	chr5	14088938	14089852	915	53	-0.959323	-20.8125	3.05483e-05	0.00514045	Hypomethylated	-31	No	No	No	Yes	Promoter	AT5G35935	39
92	chr5	6789082	6789690	609	25	-0.979496	-7.1943	0.000946999	0.0321632	Hypomethylated	-31	No	No	No	Yes	Promoter	AT5G20100	-245	MASS3
19	chr1	23754870	23755663	794	30	-0.902942	-13.2283	3.18228e-05	0.0026167	Hypomethylated	-29	No	Yes	No	No	Promoter	AT1G64035	2073
39	chr5	18136746	18137177	432	14	-0.910852	-9.78718	6.10967e-05	0.00646228	Hypomethylated	-29	No	No	No	Yes	Promoter	AT5G44910	-172
79	chr2	18845786	18846019	234	16	-0.901328	-8.70265	0.000343139	0.0120546	Hypomethylated	-29	No	No	Yes	No	Promoter	AT2G45760	1816	BAL	Encodes a protein that is similar to BONZAI1-binding protein BAP1.
56	chr2	2082147	2082759	613	37	-0.894607	-11.7104	9.35833e-05	0.00945191	Hypomethylated	-28	No	No	No	Yes	Promoter	AT2G05620	-288	AtPGR5	Involved in electron flow in Photosystem I. Essential for photoprotection.
50	chr3	12799318	12800127	810	52	-0.835735	-15.8419	6.43915e-05	0.00820496	Hypomethylated	-27	No	No	Yes	Yes	Promoter	AT3G31430	-2447
60	chr3	20853426	20854011	586	30	-0.837349	-12.4379	9.65873e-05	0.00820496	Hypomethylated	-27	No	No	No	Yes	Promoter	AT3G56210	1548
102	chr1	2334945	2335586	642	11	-0.81949	-6.29011	0.0022276	0.0369699	Hypomethylated	-26	No	No	No	Yes	Promoter	AT1G07580	123
5	chr5	8398517	8399123	607	19	-0.781034	-10.2224	3.05483e-05	0.00514045	Hypomethylated	-25	No	No	No	Yes	Promoter	AT5G24557	-2420
40	chr5	14007147	14007607	461	16	-0.780701	-9.97524	6.10967e-05	0.00646228	Hypomethylated	-25	No	No	No	Yes	Promoter	AT5G35840	-205	PHYC	Encodes the apoprotein of phytochrome;one of a family of photoreceptors that modulate plant growth and development.
6	chr5	8586055	8587138	1084	31	-0.762742	-14.1321	3.05483e-05	0.00514045	Hypomethylated	-24	No	No	Yes	No	Promoter	AT5G24920	1520	AtGDU5	Encodes a member of the GDU (glutamine dumper) family proteins involved in amino acid export: At4g31730 (GDU1), At4g25760 (GDU2), At5g57685 (GDU3), At2g24762 (GDU4), At5g24920 (GDU5), At3g30725 (GDU6) and At5g38770 (GDU7).
36	chr4	15627234	15628567	1334	43	-0.756897	-17.3747	3.76294e-05	0.00397393	Hypomethylated	-24	No	No	No	Yes	Promoter	AT4G32370	1676
69	chr1	9453663	9454441	779	22	-0.753934	-8.35259	0.000159114	0.00548262	Hypomethylated	-24	No	No	Yes	No	Promoter	AT1G06047	1031
80	chr2	15381808	15382250	443	19	-0.765072	-9.1294	0.000343139	0.0120546	Hypomethylated	-24	No	No	No	Yes	Promoter	AT2G36690	2148	GAS2
97	chr3	7857148	7857955	808	14	-0.769182	-6.95035	0.00183516	0.035764	Hypomethylated	-24	No	No	No	Yes	Promoter	AT3G22235	-1334	AthCYSTM8
101	chr4	9048969	9049271	303	12	-0.762647	-6.59508	0.00214487	0.0484152	Hypomethylated	-24	No	Yes	Yes	No	Promoter	AT4G15970	-57
7	chr5	10031134	10031869	736	48	-0.723269	-16.4935	3.05483e-05	0.00514045	Hypomethylated	-23	No	Yes	No	No	Promoter	AT5G28030	809	DES1
23	chr1	21341681	21342268	588	30	-0.728431	-11.5687	3.18228e-05	0.0026167	Hypomethylated	-23	No	No	No	Yes	Promoter	AT1G57620	-359	CYB
24	chr1	24571969	24572963	995	46	-0.720599	-14.9417	3.18228e-05	0.0026167	Hypomethylated	-23	No	No	No	Yes	Promoter	AT1G65990	508	PRXIIA
25	chr1	6721931	6722600	670	27	-0.714977	-11.9025	3.18228e-05	0.0026167	Hypomethylated	-23	No	Yes	No	No	Promoter	AT1G19420	514
43	chr1	28470097	28471014	918	35	-0.720368	-9.40102	6.36456e-05	0.00418672	Hypomethylated	-23	No	No	No	Yes	Promoter	AT1G09583	0
73	chr4	6357907	6358323	417	13	-0.721863	-8.49659	0.000188147	0.00942966	Hypomethylated	-23	No	No	No	Yes	Promoter	AT4G10201	2168
99	chr2	11740056	11740688	633	23	-0.713418	-6.97876	0.00187167	0.0315387	Hypomethylated	-23	No	No	No	Yes	Promoter	AT2G27460	0	AtSEC23D
27	chr1	16881311	16882272	962	47	-0.684494	-12.0075	3.18228e-05	0.0026167	Hypomethylated	-22	No	No	No	Yes	Promoter	AT1G44707	670
90	chr5	21013962	21014923	962	22	-0.702913	-7.39069	0.000824805	0.0296449	Hypomethylated	-22	No	No	No	Yes	Promoter	AT5G07775	0
28	chr1	26710681	26711313	633	37	-0.650038	-11.5657	3.18228e-05	0.0026167	Hypomethylated	-21	No	No	No	Yes	Promoter	AT1G70830	149	MLP28
52	chr3	14273980	14274975	996	42	-0.674177	-14.6601	6.43915e-05	0.00820496	Hypomethylated	-21	No	No	No	Yes	Promoter	AT3G42090	0
53	chr3	11509438	11510330	893	53	-0.668673	-16.763	6.43915e-05	0.00820496	Hypomethylated	-21	No	No	No	Yes	Promoter	AT3G05945	180
71	chr1	17695637	17696024	388	20	-0.671143	-8.23031	0.000159114	0.00548262	Hypomethylated	-21	No	No	No	Yes	Promoter	AT1G07463	0
72	chr3	11100928	11101331	404	25	-0.650326	-10.4075	0.000160979	0.01094	Hypomethylated	-21	No	No	No	Yes	Promoter	AT3G29130	2178
96	chr2	637790	638348	559	31	-0.646294	-7.24934	0.00137256	0.0262491	Hypomethylated	-21	No	No	No	Yes	Promoter	AT2G02440	0
54	chr5	13588964	13589825	862	53	-0.63295	-9.2254	9.1645e-05	0.00807785	Hypomethylated	-20	Yes	Yes	No	No	Promoter	AT5G35370	1446
62	chr3	10358808	10360408	1601	37	-0.613066	-11.1805	9.65873e-05	0.00820496	Hypomethylated	-20	No	No	No	Yes	Promoter	AT3G27910	-527
82	chr2	2727832	2728849	1018	13	-0.640153	-8.24402	0.000436722	0.012168	Hypomethylated	-20	No	No	No	Yes	Promoter	AT2G06822	226
29	chr1	25343564	25344369	806	45	0.635556	11.623	3.18228e-05	0.0026167	Hypermethylated	20	Yes	Yes	No	No	Promoter	AT1G67626	0
44	chr1	12019976	12020448	473	19	0.643104	9.48054	6.36456e-05	0.00418672	Hypermethylated	20	No	Yes	No	No	Promoter	AT1G33135	1293
67	chr5	10236465	10237931	1467	45	0.638401	8.73836	0.000152742	0.00807785	Hypermethylated	20	No	No	No	Yes	Promoter	AT5G28260	-459
77	chr2	4507726	4508479	754	30	0.616519	9.78048	0.000311944	0.0120546	Hypermethylated	20	No	No	No	Yes	Promoter	AT2G11330	-763
66	chr5	18538699	18540837	2139	30	0.653	8.44178	0.000152742	0.00807785	Hypermethylated	21	No	No	No	Yes	Promoter	AT5G45710	0	AT-HSFA4C	Member of Heat Stress Transcription Factor (Hsf) family
70	chr1	24733235	24733628	394	21	0.673463	8.32724	0.000159114	0.00548262	Hypermethylated	21	No	No	No	Yes	Promoter	AT1G66340	-534	AtETR1	Similar to prokaryote sensory transduction proteins. Contains a histidine kinase and a response regulator domain. Homodimer. Membrane component. Binds ethylene. Mutations affect ethylene binding and metabolism of other plant hormones such as auxin, cytokinins, ABA and gibberellic acid. Ethylene receptor. Has histidine kinase activity. Is regulated by RTE1.
78	chr3	11761017	11761582	566	24	0.667122	8.7221	0.000321958	0.0119848	Hypermethylated	21	No	No	No	Yes	Promoter	AT3G30122	0
93	chr2	2308180	2308697	518	25	0.651227	7.36443	0.001123	0.0222671	Hypermethylated	21	No	No	No	Yes	Promoter	AT2G05970	1087	AtFDB12
103	chr2	7696302	7697053	752	23	0.654902	6.46261	0.00308825	0.0381896	Hypermethylated	21	No	No	No	Yes	Promoter	AT2G17720	-258	P4H5
8	chr5	15623442	15623968	527	27	0.679399	16.3798	3.05483e-05	0.00514045	Hypermethylated	22	No	No	No	Yes	Promoter	AT5G39040	-1492	ABCB27	Encodes a member of TAP subfamily of ABC transporters that is located in the vacuole. Mutants are hypersensitive to aluminum and the gene product may be important for intracellular movement of some substrate, possibly chelated Al, as part of a mechanism of aluminum sequestration.
61	chr3	11097249	11098610	1362	51	0.696792	11.2357	9.65873e-05	0.00820496	Hypermethylated	22	No	No	No	Yes	Promoter	AT3G29120	0
75	chr3	4086867	4087378	512	24	0.6852	9.84431	0.000257566	0.01094	Hypermethylated	22	No	No	No	Yes	Promoter	AT3G12840	-897
76	chr2	14010460	14010782	323	18	0.676341	9.84649	0.000311944	0.0120546	Hypermethylated	22	No	No	Yes	Yes	Promoter	AT2G33010	-56
83	chr1	21858100	21858697	598	10	0.684435	7.62193	0.000445519	0.0117656	Hypermethylated	22	No	No	No	Yes	Promoter	AT1G08253	616
22	chr1	16491919	16492836	918	32	0.738128	16.3047	3.18228e-05	0.0026167	Hypermethylated	23	No	No	No	Yes	Promoter	AT1G43715	-580
26	chr1	21848993	21849731	739	35	0.710227	13.4164	3.18228e-05	0.0026167	Hypermethylated	23	No	No	No	Yes	Promoter	AT1G59453	0
37	chr4	9005648	9006712	1065	32	0.736012	13.8464	3.76294e-05	0.00397393	Hypermethylated	23	No	No	No	Yes	Promoter	AT4G15860	1455
65	chr5	3628164	3628776	613	27	0.713567	8.96904	0.000152742	0.00807785	Hypermethylated	23	No	No	No	Yes	Promoter	AT5G11370	315
85	chr1	12549246	12550072	827	17	0.73143	7.51137	0.000509165	0.0125317	Hypermethylated	23	No	No	No	Yes	Promoter	AT1G34370	-267	AtSTOP1	Encodes a putative nuclear Cys(2)His(2)-type zinc finger protein involved in H+ and Al3+ rhizotoxicity. In mutants exposed to aluminum stress, there is no induction of AtALMT1, an malate transporter known to be involved in the mediation of aluminum toxicity.
89	chr2	9333237	9334044	808	17	0.707282	7.72352	0.000748666	0.0169209	Hypermethylated	23	No	No	No	Yes	Promoter	AT2G21895	0
98	chr1	8497306	8497918	613	16	0.736466	6.48307	0.00184572	0.0325748	Hypermethylated	23	No	No	No	Yes	Promoter	AT1G24000	-740
42	chr1	20509401	20510235	835	23	0.745202	9.49778	6.36456e-05	0.00418672	Hypermethylated	24	No	No	No	Yes	Promoter	AT1G54985	0
63	chr5	13882915	13883465	551	17	0.76162	9.08319	0.000122193	0.00807785	Hypermethylated	24	No	No	No	Yes	Promoter	AT5G35715	1693	CYP71B8	Encodes a protein with cytochrome P450 domain
51	chr3	11585582	11586306	725	42	0.787773	15.87	6.43915e-05	0.00820496	Hypermethylated	25	No	No	No	Yes	Promoter	AT3G05955	242
49	chr3	7714214	7714771	558	49	0.853318	13.5959	6.43915e-05	0.00820496	Hypermethylated	27	No	No	No	Yes	Promoter	AT3G21900	-577
87	chr5	13907567	13908397	831	25	0.840506	7.52304	0.00073316	0.0288495	Hypermethylated	27	No	No	No	Yes	Promoter	AT5G05275	0
20	chr1	16925397	16925716	320	16	0.887265	10.4784	3.18228e-05	0.0026167	Hypermethylated	28	No	No	No	Yes	Promoter	AT1G44820	-581
21	chr1	13353605	13354071	467	34	0.870422	19.3437	3.18228e-05	0.0026167	Hypermethylated	28	No	No	No	Yes	Promoter	AT1G35895	154
104	chr2	14653051	14653726	676	10	0.875938	6.16095	0.00414886	0.0457964	Hypermethylated	28	No	No	No	Yes	Promoter	AT2G34730	-431
91	chr1	26185822	26186168	347	16	0.919318	7.09479	0.000827393	0.0169125	Hypermethylated	29	No	No	Yes	No	Promoter	AT1G09077	428
16	chr1	8452237	8452892	656	31	0.946473	12.7702	3.18228e-05	0.0026167	Hypermethylated	30	No	No	No	Yes	Promoter	AT1G23910	-948
18	chr1	11407068	11407541	474	17	0.932523	12.9015	3.18228e-05	0.0026167	Hypermethylated	30	No	No	No	Yes	Promoter	AT1G31810	-259	AFH14	Encodes the Type II Arabidopsis formin14. Interacts with microtubules and microfilaments to regulate cell division.
86	chr4	10559027	10559594	568	11	0.937688	7.59107	0.000677328	0.0247267	Hypermethylated	30	No	No	No	Yes	Promoter	AT4G19340	-16
41	chr1	11066605	11067127	523	40	0.978923	9.37882	6.36456e-05	0.00418672	Hypermethylated	31	No	No	No	Yes	Promoter	AT1G31030	74
88	chr3	7286328	7287056	729	23	0.971881	7.96783	0.000740502	0.020444	Hypermethylated	31	No	Yes	No	No	Promoter	AT3G20830	0	AGC2-4
68	chr1	9202651	9203228	578	32	1.01067	8.6255	0.000159114	0.00548262	Hypermethylated	32	No	No	No	Yes	Promoter	AT1G26630	-2572	ATELF5A-2	Eukaryotic translation initiation factor 5A-2. Involved in programmed cell death triggered as a response to pseudomonas syringae infection. Loss of function mutants are more resistant to infection.
15	chr1	27932588	27933518	931	32	1.03331	19.5471	3.18228e-05	0.0026167	Hypermethylated	33	No	No	No	Yes	Promoter	AT1G74290	752
58	chr3	3120224	3121088	865	18	1.06464	12.1091	9.65873e-05	0.00820496	Hypermethylated	34	No	Yes	Yes	No	Promoter	AT3G10114	733
74	chr1	18457930	18458362	433	13	1.05819	7.99415	0.000254582	0.00761223	Hypermethylated	34	No	Yes	No	No	Promoter	AT1G49860	-164	ATGSTF14	Encodes glutathione transferase belonging to the phi class of GSTs. Naming convention according to Wagner et al. (2002).
81	chr2	6830204	6830653	450	22	1.08064	8.22437	0.000436722	0.012168	Hypermethylated	34	No	No	No	Yes	Promoter	AT2G15680	-342	AtCML30
34	chr4	2309138	2310379	1242	49	1.1622	26.9332	3.76294e-05	0.00397393	Hypermethylated	37	No	No	No	Yes	Promoter	AT4G04601	0
46	chr3	16584304	16585142	839	23	1.24713	16.3365	6.43915e-05	0.00820496	Hypermethylated	40	No	No	No	Yes	Promoter	AT3G45250	581
47	chr3	11121682	11122339	658	36	1.24384	14.7992	6.43915e-05	0.00820496	Hypermethylated	40	No	No	No	Yes	Promoter	AT3G29153	-1105
94	chr3	6335728	6336446	719	11	1.24235	7.35165	0.00122344	0.0279535	Hypermethylated	40	No	No	No	Yes	Promoter	AT3G18470	0
14	chr1	28515039	28516018	980	55	1.30084	20.1505	3.18228e-05	0.0026167	Hypermethylated	41	No	Yes	No	No	Promoter	AT1G75945	0
13	chr1	17234272	17234797	526	30	1.43494	24.6494	3.18228e-05	0.0026167	Hypermethylated	46	No	No	No	Yes	Promoter	AT1G46408	-1321	AGL97
1	chr5	18779744	18780332	589	26	1.53509	15.0776	3.05483e-05	0.00514045	Hypermethylated	49	No	No	No	Yes	Promoter	AT5G46295	0
9	chr2	5075847	5077994	2148	144	1.54954	53.532	3.11944e-05	0.00672136	Hypermethylated	49	No	No	No	Yes	Promoter	AT2G12490	1463
55	chr2	14753423	14753839	417	17	1.72539	11.6871	9.35833e-05	0.00945191	Hypermethylated	55	No	Yes	No	No	Promoter	AT2G35000	-104	ATL2G	E3 ligase-like protein induced by chitin oligomers.

## Sheet: CHH
Index	chr	start	end	width	CpGs	betaCoefficient	statistic	p.value	q.value	direction	difference	CpG.Island	CpG.Shore	CpG.Shelf	Open.Sea	annotation	geneId	distanceToTSS	geneSymbol	gene
82	chr2	19697352	19697534	183	57	-0.978089	-7.90695	0.0123448	0.0706335	Hypomethylated	-31	No	No	No	No	Promoter	AT2G48160	-531	HULK2
20	chr2	12773511	12774356	846	265	-0.693585	-16.1886	0.000269833	0.0142176	Hypomethylated	-22	No	No	No	Yes	Promoter	AT2G08355	418
12	chr2	7632633	7633855	1223	266	-0.624316	-21.0366	0.000134916	0.0121042	Hypomethylated	-20	No	Yes	Yes	No	Promoter	AT2G06995	0
52	chr5	15689923	15690084	162	26	0.632021	9.96425	0.00197918	0.0502459	Hypermethylated	20	No	No	No	Yes	Promoter	AT5G39185	-218
45	chr2	9333172	9334066	895	242	0.654289	11.7647	0.00148408	0.0231287	Hypermethylated	21	No	No	No	Yes	Promoter	AT2G21895	0
65	chr3	216	546	331	56	0.977856	10.6908	0.00292652	0.0717694	Hypermethylated	31	No	No	No	Yes	Distal Intergenic	AT3G01015	3613	MD60

## Sheet: Promoter
Context	Index	chr	start	end	width	CpGs	betaCoefficient	statistic	p.value	q.value	direction	difference	CpG.Island	CpG.Shore	CpG.Shelf	Open.Sea	annotation	geneId	distanceToTSS	geneSymbol	gene	OFFICIAL_GENE_SYMBOL	Gene Name
CpG	504	chr4	7825721	7826172	452	11	-2.44392	-5.45788	0.000496642	0.0202933	Hypomethylated	-78	No	Yes	No	No	Promoter	AT4G13460	825	SDG22	Encodes a SU(VAR)3-9 homolog, a SET domain protein. Known SET domain proteins are involved in epigenetic control of gene expression and act as histone methyltransferases. There are 10 SUVH genes in Arabidopsis and members of this subfamily of the SET proteins have an additional conserved SRA domain. A plant line expressing an RNAi construct directed against this gene has reduced agrobacterium-med…	SUVH9	SU(VAR)3-9 homolog 9(SUVH9)
CpG	27	chr5	14088969	14089879	911	30	-2.15768	-45.4655	1.57448e-05	0.00279936	Hypomethylated	-69	No	No	No	Yes	Promoter	AT5G35935	12			AT5G35935	pseudo(AT5G35935)
CpG	94	chr4	5987466	5988468	1003	42	-2.10065	-24.6915	2.15931e-05	0.00484472	Hypomethylated	-67	No	No	No	Yes	Promoter	AT4G09455	47			AT4G09455	pseudo(AT4G09455)
CpG	81	chr2	7632856	7633488	633	10	-1.95719	-37.2454	2.02901e-05	0.00781648	Hypomethylated	-62	No	Yes	No	No	Promoter	AT2G06995	0
CpG	3	chr1	11953363	11954256	894	25	-1.92439	-42.5918	1.50085e-05	0.00497102	Hypomethylated	-61	No	No	No	Yes	Promoter	AT1G32975	274			AT1G32975	uncharacterized protein(AT1G32975)
CpG	69	chr3	12799279	12800096	818	18	-1.92767	-19.1679	1.76853e-05	0.0096183	Hypomethylated	-61	No	No	Yes	Yes	Promoter	AT3G31430	-2408			AT3G31430	zinc knuckle (CCHC-type) family protein(AT3G31430)
CpG	5	chr1	16881674	16882428	755	17	-1.87597	-19.1018	1.50085e-05	0.00497102	Hypomethylated	-60	No	No	No	Yes	Promoter	AT1G44707	514			AT1G44707	pseudo(AT1G44707)
CpG	82	chr2	2082096	2082633	538	24	-1.88925	-11.8535	2.02901e-05	0.00781648	Hypomethylated	-60	No	No	No	Yes	Promoter	AT2G05620	-237	AtPGR5	Involved in electron flow in Photosystem I. Essential for photoprotection.	PGR5	proton gradient regulation 5(PGR5)
CpG	363	chr3	16755048	16755623	576	13	-1.76748	-6.20458	0.000247595	0.0301205	Hypomethylated	-56	No	No	No	Yes	Promoter	AT3G45638	640			AT3G45638	ncRNA(AT3G45638)
CpG	97	chr4	15627034	15628661	1628	22	-1.74057	-27.1466	2.15931e-05	0.00484472	Hypomethylated	-55	No	No	No	Yes	Promoter	AT4G32370	1476			AT4G32370	Pectin lyase-like superfamily protein(AT4G32370)
CpG	29	chr5	10342250	10343169	920	11	-1.67294	-9.02969	1.57448e-05	0.00279936	Hypomethylated	-53	No	No	No	Yes	Promoter	AT5G28390	0			AT5G28390	RNA-binding (RRM/RBD/RNP motifs) family protein(AT5G28390)
CpG	31	chr5	10265391	10265890	500	13	-1.62433	-8.21094	1.57448e-05	0.00279936	Hypomethylated	-52	No	No	No	Yes	Promoter	AT5G28285	2730			AT5G28285	pseudo(AT5G28285)
CpG	98	chr4	8087874	8088917	1044	27	-1.64381	-10.9083	2.15931e-05	0.00484472	Hypomethylated	-52	No	No	No	Yes	Promoter	AT4G13992	564			AT4G13992	Cysteine/Histidine-rich C1 domain family protein(AT4G13992)
CpG	32	chr5	8586363	8587098	736	12	-1.53676	-9.8707	1.57448e-05	0.00279936	Hypomethylated	-49	No	No	Yes	No	Promoter	AT5G24920	1828	AtGDU5	Encodes a member of the GDU (glutamine dumper) family proteins involved in amino acid export: At4g31730 (GDU1), At4g25760 (GDU2), At5g57685 (GDU3), At2g24762 (GDU4), At5g24920 (GDU5), At3g30725 (GDU6) and At5g38770 (GDU7).	GDU5	glutamine dumper 5(GDU5)
CpG	148	chr1	20433941	20434297	357	19	-1.54732	-7.05485	4.50254e-05	0.00927924	Hypomethylated	-49	No	No	No	Yes	Promoter	AT1G54760	29	AGL85		AGL85	AGAMOUS-like 85(AGL85)
CpG	33	chr5	14821242	14821874	633	10	-1.5027	-10.3152	1.57448e-05	0.00279936	Hypomethylated	-48	No	No	No	Yes	Promoter	AT5G37381	-910			AT5G37381	pseudo(AT5G37381)
CpG	99	chr4	18474027	18474799	773	11	-1.49789	-15.3963	2.15931e-05	0.00484472	Hypomethylated	-48	No	No	Yes	No	Promoter	AT4G39810	1005	NEN4		AT4G39810	Polynucleotidyl transferase, ribonuclease H-like superfamily protein(AT4G39810)
CpG	371	chr4	5337825	5338511	687	10	-1.44488	-5.85194	0.000259118	0.0144032	Hypomethylated	-46	No	No	No	Yes	Promoter	AT4G08410	2698	EXT8		AT4G08410	Proline-rich extensin-like family protein(AT4G08410)
CpG	115	chr4	5734904	5735447	544	16	-1.41565	-7.00431	4.31863e-05	0.00484472	Hypomethylated	-45	No	No	No	Yes	Promoter	AT4G08945	2236			AT4G08945	pseudo(AT4G08945)
CpG	9	chr1	16924687	16925148	462	24	-1.39224	-16.0404	1.50085e-05	0.00497102	Hypomethylated	-44	No	No	No	Yes	Promoter	AT1G44810	1247	GPL4		AT1G44810	DNA-binding storekeeper protein-related transcriptional regulator(AT1G44810)
CpG	100	chr4	6579385	6580221	837	12	-1.38583	-9.74885	2.15931e-05	0.00484472	Hypomethylated	-44	No	No	No	Yes	Promoter	AT4G05805	0
CpG	239	chr2	18845787	18846163	377	13	-1.37057	-7.74494	0.000101451	0.0282724	Hypomethylated	-44	No	No	Yes	No	Promoter	AT2G45760	1672	BAL	encodes a protein that is similar to BONZAI1-binding protein BAP1.	BAP2	BON association protein 2(BAP2)
CpG	10	chr1	23754663	23755808	1146	12	-1.36609	-9.72755	1.50085e-05	0.00497102	Hypomethylated	-43	No	Yes	No	No	Promoter	AT1G64035	1928			AT1G64035	miscRNA(AT1G64035)
CpG	12	chr1	24572115	24573067	953	26	-1.3355	-10.9719	1.50085e-05	0.00497102	Hypomethylated	-43	No	No	No	Yes	Promoter	AT1G65990	404	PRXIIA		AT1G65990	type 2 peroxiredoxin-related / thiol specific antioxidant / mal allergen family protein(AT1G65990)
CpG	72	chr3	20853336	20854036	701	22	-1.36475	-9.88849	1.76853e-05	0.0096183	Hypomethylated	-43	No	No	No	Yes	Promoter	AT3G56210	1523			AT3G56210	ARM repeat superfamily protein(AT3G56210)
CpG	86	chr2	4500729	4501365	637	13	-1.34882	-13.0321	2.02901e-05	0.00781648	Hypomethylated	-43	No	No	No	Yes	Promoter	AT2G11320	0			AT2G11320	pseudo(AT2G11320)
CpG	87	chr2	7328463	7329656	1194	10	-1.33877	-10.7748	2.02901e-05	0.00781648	Hypomethylated	-43	No	No	No	Yes	Promoter	AT2G16905	0			AT2G16905	miscRNA(AT2G16905)
CpG	470	chr5	16602673	16603118	446	15	-1.35797	-5.70651	0.000409365	0.0294743	Hypomethylated	-43	No	No	No	Yes	Promoter	AT5G41494	84			AT5G41494	miscRNA(AT5G41494)
CpG	13	chr1	25304798	25305418	621	25	-1.29821	-8.94127	1.50085e-05	0.00497102	Hypomethylated	-41	No	No	No	Yes	Promoter	AT1G67520	939			AT1G67520	lectin protein kinase family protein(AT1G67520)
CpG	35	chr5	18065074	18066033	960	31	-1.29112	-9.46819	1.57448e-05	0.00279936	Hypomethylated	-41	No	No	Yes	No	Promoter	AT5G44770	62			AT5G44770	Cysteine/Histidine-rich C1 domain family protein(AT5G44770)
CpG	74	chr3	10358292	10360406	2115	27	-1.30375	-13.6275	1.76853e-05	0.0096183	Hypomethylated	-41	No	No	No	Yes	Promoter	AT3G27910	-11			AT3G27910	Galactose oxidase/kelch repeat superfamily protein(AT3G27910)
CpG	36	chr5	19413403	19414516	1114	12	-1.26384	-11.2761	1.57448e-05	0.00279936	Hypomethylated	-40	No	No	No	Yes	Promoter	AT5G47940	-1326			AT5G47940	40S ribosomal protein S27(AT5G47940)
CpG	88	chr2	17362833	17363679	847	32	-1.24427	-9.36843	2.02901e-05	0.00781648	Hypomethylated	-40	No	No	No	Yes	Promoter	AT2G41640	2414	GT61		AT2G41640	Glycosyltransferase family 61 protein(AT2G41640)
CpG	117	chr4	12096483	12097181	699	11	-1.26991	-8.08711	4.31863e-05	0.00484472	Hypomethylated	-40	No	No	No	Yes	Promoter	AT4G23080	989			AT4G23080	transmembrane protein, putative (DUF239)(AT4G23080)
CpG	217	chr5	13653149	13654226	1078	13	-1.26672	-6.30628	7.8724e-05	0.00879287	Hypomethylated	-40	No	Yes	No	No	Promoter	AT5G35420	1711			AT5G35420	pseudo(AT5G35420)
CpG	549	chr3	14734951	14735573	623	13	-1.26758	-5.57719	0.000565931	0.0406509	Hypomethylated	-40	No	No	No	Yes	Promoter	AT3G42646	0			AT3G42646	miscRNA(AT3G42646)
CpG	101	chr4	10151118	10151631	514	12	-1.23123	-9.62412	2.15931e-05	0.00484472	Hypomethylated	-39	No	No	No	Yes	Promoter	AT4G18370	2167	DEG5	Encodes DEG5. Forms a hexamer with DEG8 in the thylakoid lumen. Involved in the cleavage of photodamaged D2 protein of photosystem II (PSII).	DEG5	DEGP protease 5(DEG5)
CpG	264	chr3	6026552	6027121	570	15	-1.23861	-6.72276	0.000141483	0.0256488	Hypomethylated	-39	No	No	No	Yes	Promoter	AT3G17611	1756	ATRBL10		RBL14	RHOMBOID-like protein 14(RBL14)
CpG	119	chr4	7644042	7644656	615	13	-1.19426	-7.6571	4.31863e-05	0.00484472	Hypomethylated	-38	No	No	No	Yes	Promoter	AT4G13120	1931			AT4G13120	pseudo(AT4G13120)
CpG	482	chr2	18932263	18932568	306	11	-1.19261	-6.01303	0.000446383	0.0406023	Hypomethylated	-38	No	No	No	Yes	Promoter	AT2G46030	976	UBC6	Ubiquitin conjugating enzyme E2	UBC6	ubiquitin-conjugating enzyme 6(UBC6)
CpG	450	chr3	8373231	8373833	603	12	-1.16075	-5.7385	0.000371392	0.0317728	Hypomethylated	-37	No	No	No	Yes	Promoter	AT3G23380	0	RIC5	encodes a member of a novel protein family that contains contain a CRIB (for Cdc42/Rac-interactive binding) motif required for their specific interaction with GTP-bound Rop1 (plant-specific Rho GTPase). Interacts with Rop1 and is involved in pollen tube growth and function. Gene is expressed predominantly in inflorescence and flower tissue.	RIC5	ROP-interactive CRIB motif-containing protein 5(RIC5)
CpG	15	chr1	26710574	26711345	772	30	-1.14118	-12.7735	1.50085e-05	0.00497102	Hypomethylated	-36	No	No	No	Yes	Promoter	AT1G70830	117	MLP28		MLP28	MLP-like protein 28(MLP28)
CpG	16	chr1	21449083	21449803	721	10	-1.1358	-8.30663	1.50085e-05	0.00497102	Hypomethylated	-36	No	Yes	No	No	Promoter	AT1G58010	0			AT1G58010	miscRNA(AT1G58010)
CpG	75	chr3	1559901	1560747	847	28	-1.11995	-9.59046	1.76853e-05	0.0096183	Hypomethylated	-36	No	No	No	Yes	Promoter	AT3G05415	0			AT3G05415	pseudo(AT3G05415)
CpG	103	chr4	8824881	8825524	644	24	-1.12478	-8.60637	2.15931e-05	0.00484472	Hypomethylated	-36	No	No	No	Yes	Promoter	AT4G15420	1479			AT4G15420	Ubiquitin fusion degradation UFD1 family protein(AT4G15420)
CpG	201	chr3	14274056	14274986	931	16	-1.13454	-7.81869	7.07414e-05	0.016832	Hypomethylated	-36	No	No	No	Yes	Promoter	AT3G42090	0			AT3G42090	pseudo(AT3G42090)
CpG	229	chr2	1119731	1120256	526	35	-1.12842	-7.77706	8.11606e-05	0.0279748	Hypomethylated	-36	No	No	Yes	No	Promoter	AT2G03670	2246	CDC48B	CDC48 - like protein AAA-type ATPaseCell. division control protein 48 homolog B	CDC48B	cell division cycle 48B(CDC48B)
CpG	277	chr3	22059362	22060273	912	11	-1.12513	-6.54733	0.000176853	0.0269312	Hypomethylated	-36	No	No	Yes	Yes	Promoter	AT3G59720	0			AT3G59720	pseudo(AT3G59720)
CpG	447	chr2	551531	551943	413	11	-1.13765	-6.18337	0.000365223	0.0405397	Hypomethylated	-36	No	No	No	Yes	Promoter	AT2G02150	913	EMB2794		EMB2794	Tetratricopeptide repeat (TPR)-like superfamily protein(EMB2794)
CpG	17	chr1	4068611	4069099	489	17	-1.09518	-9.95632	1.50085e-05	0.00497102	Hypomethylated	-35	No	No	Yes	No	Promoter	AT1G04923	314
CpG	19	chr1	9756630	9757273	644	26	-1.08748	-8.52615	1.50085e-05	0.00497102	Hypomethylated	-35	No	No	Yes	No	Promoter	AT1G28005	0
CpG	38	chr5	2305386	2306098	713	17	-1.11414	-8.29728	1.57448e-05	0.00279936	Hypomethylated	-35	No	No	No	Yes	Promoter	AT5G07310	0	ERF115	Encodes a member of the ERF (ethylene response factor) subfamily B-4 of ERF/AP2 transcription factor family. The protein contains one AP2 domain. There are 7 members in this subfamily.	AT5G07310	Integrase-type DNA-binding superfamily protein(AT5G07310)
CpG	39	chr5	15592107	15593059	953	11	-1.08675	-9.29559	1.57448e-05	0.00279936	Hypomethylated	-35	No	No	No	Yes	Promoter	AT5G38960	0			AT5G38960	RmlC-like cupins superfamily protein(AT5G38960)
CpG	176	chr5	17640836	17641695	860	17	-1.08725	-6.40752	6.29792e-05	0.00844115	Hypomethylated	-35	No	No	No	Yes	Promoter	AT5G43880	2285	TRM21		TRM21	methyl-coenzyme M reductase II subunit gamma, putative (DUF3741)(TRM21)
CpG	185	chr4	2539577	2540609	1033	22	-1.08589	-6.26976	6.47794e-05	0.00562942	Hypomethylated	-35	No	No	Yes	No	Promoter	AT4G04970	2652	ATGSL01	Encodes a gene similar to callose synthase	GSL1	glucan synthase-like 1(GSL1)
CpG	202	chr3	11509323	11510529	1207	29	-1.11517	-7.78438	7.07414e-05	0.016832	Hypomethylated	-35	No	No	No	Yes	Promoter	AT3G05945	0
CpG	396	chr3	1266765	1267296	532	16	-1.08755	-6.01461	0.000300651	0.0301205	Hypomethylated	-35	No	No	No	Yes	Promoter	AT3G04670	1082	ATWRKY39	Member of WRKY Transcription Factor; Group II-d	WRKY39	WRKY DNA-binding protein 39(WRKY39)
CpG	582	chr1	4505750	4506157	408	11	-1.08814	-5.22023	0.000615348	0.0292653	Hypomethylated	-35	No	No	No	Yes	Promoter	AT1G13195	-2074			AT1G13195	RING/U-box superfamily protein(AT1G13195)
CpG	89	chr2	9038699	9039304	606	11	-1.06732	-9.27915	2.02901e-05	0.00781648	Hypomethylated	-34	No	Yes	No	No	Promoter	AT2G21060	-917	ATCSP4	glycine-rich protein (AtGRP2b)	GRP2B	glycine-rich protein 2B(GRP2B)
CpG	120	chr4	11208293	11208858	566	48	-1.05838	-7.48998	4.31863e-05	0.00484472	Hypomethylated	-34	No	No	No	Yes	Promoter	AT4G06975	505
CpG	121	chr4	9446280	9446732	453	12	-1.05348	-8.44218	4.31863e-05	0.00484472	Hypomethylated	-34	No	No	No	Yes	Promoter	AT4G16780	-2382	ATHB-2	Encodes a homeodomain-leucine zipper protein that is rapidly and strongly induced by changes in the ratio of red to far-red light. It is also involved in cell expansion and cell proliferation and in the response to auxin.	HB-2	homeobox protein 2(HB-2)
CpG	290	chr2	6360764	6361372	609	24	-1.06175	-6.8236	0.000182611	0.0282724	Hypomethylated	-34	No	No	No	Yes	Promoter	AT2G14820	2508	MEL3	A member of the NPY gene family (NPY1/AT4G31820, NPY2/AT2G14820, NPY3/AT5G67440, NPY4/AT2G23050, NPY5/AT4G37590). Involved in auxin-mediated organogenesis.	NPY2	Phototropic-responsive NPH3 family protein(NPY2)
CpG	325	chr1	21046155	21046983	829	41	-1.07552	-5.86291	0.000225127	0.0181058	Hypomethylated	-34	No	No	No	Yes	Promoter	AT1G56230	2171			AT1G56230	enolase (DUF1399)(AT1G56230)
CpG	345	chr1	19486094	19486543	450	12	-1.07026	-5.78985	0.000240136	0.0181058	Hypomethylated	-34	No	Yes	No	No	Promoter	AT1G52320	1873			AT1G52320	kinesin-like protein(AT1G52320)
CpG	674	chr1	8836442	8836620	179	11	-1.0783	-5.03653	0.00099056	0.0395968	Hypomethylated	-34	No	No	No	Yes	Promoter	AT1G05927	230
CpG	108	chr1	13979921	13980747	827	11	-1.04118	-7.93849	3.0017e-05	0.00843568	Hypomethylated	-33	No	No	No	Yes	Promoter	AT1G36915	-811			AT1G36915	pseudo(AT1G36915)
CpG	246	chr4	1027328	1028037	710	16	-1.03761	-6.12194	0.000107966	0.00854036	Hypomethylated	-33	No	Yes	No	No	Promoter	AT4G02320	-1149	PMEI-PME40		AT4G02320	Plant invertase/pectin methylesterase inhibitor superfamily(AT4G02320)
CpG	40	chr5	17859471	17859860	390	13	-1.01386	-7.70822	1.57448e-05	0.00279936	Hypomethylated	-32	No	No	No	Yes	Promoter	AT5G44340	1290	TUB4	Beta-tubulin gene	TUB4	tubulin beta chain 4(TUB4)
CpG	104	chr4	8562356	8563089	734	33	-1.02038	-12.8327	2.15931e-05	0.00484472	Hypomethylated	-32	No	No	No	Yes	Promoter	AT4G14980	578			AT4G14980	Cysteine/Histidine-rich C1 domain family protein(AT4G14980)
CpG	122	chr4	12452566	12453398	833	18	-1.00759	-6.85139	4.31863e-05	0.00484472	Hypomethylated	-32	No	No	Yes	Yes	Promoter	AT4G23980	1423	ARF9	Encodes auxin response factor 9 (ARF9).	ARF9	auxin response factor 9(ARF9)
CpG	162	chr1	25650381	25651281	901	15	-0.995274	-6.84962	6.00339e-05	0.00927924	Hypomethylated	-32	No	No	Yes	Yes	Promoter	AT1G68410	1721			AT1G68410	Protein phosphatase 2C family protein(AT1G68410)
CpG	186	chr4	7321456	7321990	535	18	-1.00498	-6.54695	6.47794e-05	0.00562942	Hypomethylated	-32	No	Yes	Yes	No	Promoter	AT4G12340	520			AT4G12340	copper ion binding protein(AT4G12340)
CpG	203	chr3	14469776	14470619	844	11	-1.00017	-8.12306	7.07414e-05	0.016832	Hypomethylated	-32	No	No	No	Yes	Promoter	AT3G42316	88			AT3G42316	pseudo(AT3G42316)
CpG	397	chr3	7328819	7329334	516	15	-0.996345	-5.95474	0.000300651	0.0301205	Hypomethylated	-32	No	No	No	Yes	Promoter	AT3G20920	1417	AtSEC62		AT3G20920	translocation protein-like protein(AT3G20920)
CpG	427	chr2	8251709	8251947	239	18	-0.992577	-6.22871	0.000344933	0.0403386	Hypomethylated	-32	No	No	No	Yes	Promoter	AT2G19045	97	RALFL13	Member of a diversely expressed predicted peptide family showing sequence similarity to tobacco Rapid Alkalinization Factor (RALF), and is believed to play an essential role in the physiology of Arabidopsis. Consists of a single exon and is characterized by a conserved C-terminal motif and N-terminal signal peptide.	RALFL13	RALF-like 13(RALFL13)
CpG	475	chr2	10888950	10889559	610	15	-0.996397	-6.1423	0.000426093	0.0406023	Hypomethylated	-32	No	No	No	Yes	Promoter	AT2G25580	941	MEF8		MEF8	Tetratricopeptide repeat (TPR)-like superfamily protein(MEF8)
CpG	483	chr2	5082913	5083653	741	26	-1.00372	-6.02216	0.000446383	0.0406023	Hypomethylated	-32	No	No	No	Yes	Promoter	AT2G05835	-395
CpG	20	chr1	25454132	25454556	425	26	-0.983812	-8.15376	1.50085e-05	0.00497102	Hypomethylated	-31	No	No	No	Yes	Promoter	AT1G67880	1267			AT1G67880	beta-1,4-N-acetylglucosaminyltransferase family protein(AT1G67880)
CpG	41	chr5	5855883	5856655	773	21	-0.986933	-8.91181	1.57448e-05	0.00279936	Hypomethylated	-31	No	No	No	Yes	Promoter	AT5G17740	1279			AT5G17740	P-loop containing nucleoside triphosphate hydrolases superfamily protein(AT5G17740)
CpG	42	chr5	6788991	6789691	701	14	-0.98354	-7.92232	1.57448e-05	0.00279936	Hypomethylated	-31	No	No	No	Yes	Promoter	AT5G20100	-244	MASS3		AT5G20100	plant/protein(AT5G20100)
CpG	373	chr4	6024398	6025090	693	13	-0.963149	-5.78087	0.000259118	0.0144032	Hypomethylated	-31	No	No	No	Yes	Promoter	AT4G09520	2033			AT4G09520	Cofactor-independent phosphoglycerate mutase(AT4G09520)
CpG	406	chr1	20102831	20103482	652	42	-0.95945	-5.56574	0.000315178	0.0201584	Hypomethylated	-31	Yes	Yes	No	No	Promoter	AT1G53840	1532	ATPME1	Encodes a pectin methylesterase	PME1	pectin methylesterase 1(PME1)
CpG	492	chr5	8620210	8620960	751	17	-0.981903	-5.63316	0.000456599	0.0310773	Hypomethylated	-31	No	Yes	Yes	No	Promoter	AT5G25030	31			AT5G25030	ATP-binding protein (DUF2431)(AT5G25030)
CpG	544	chr1	9931376	9931572	197	10	-0.976811	-5.30147	0.000555314	0.0282843	Hypomethylated	-31	No	No	No	Yes	Promoter	AT1G28323	2975			AT1G28323	pseudo(AT1G28323)
CpG	584	chr4	6357548	6358499	952	14	-0.969712	-5.29839	0.000626201	0.0232751	Hypomethylated	-31	No	No	No	Yes	Promoter	AT4G10201	1809			AT4G10201	miscRNA(AT4G10201)
CpG	599	chr5	1801335	1802031	697	10	-0.963462	-5.33487	0.000677027	0.037096	Hypomethylated	-31	No	No	No	Yes	Promoter	AT5G05980	2429	ATDFB		DFB	DHFS-FPGS homolog B(DFB)
CpG	654	chr4	14628111	14628747	637	11	-0.980985	-5.19184	0.000906912	0.0305773	Hypomethylated	-31	No	No	No	Yes	Promoter	AT4G29910	1993	ATORC5	Origin Recognition Complex subunit 5. Involved in the initiation of DNA replication. Interacts strongly with all ORC subunits.	ORC5	origin recognition complex protein 5(ORC5)
CpG	21	chr1	24620108	24620549	442	34	-0.956338	-13.2753	1.50085e-05	0.00497102	Hypomethylated	-30	Yes	Yes	No	No	Promoter	AT1G66140	1568	ZFP4	Encodes a zinc finger protein containing only a single zinc finger.	ZFP4	zinc finger protein 4(ZFP4)
CpG	90	chr2	441488	442143	656	49	-0.943521	-8.82821	2.02901e-05	0.00781648	Hypomethylated	-30	No	Yes	No	No	Promoter	AT2G01950	2181	BRL2	Encodes a leucine rich repeat receptor kinase and associated with provascular/procambial cells. Similar to BRI, brassinosteroid receptor protein.	BRL2	BRI1-like 2(BRL2)
CpG	124	chr4	8277735	8278134	400	17	-0.935633	-7.07403	4.31863e-05	0.00484472	Hypomethylated	-30	No	No	No	Yes	Promoter	AT4G14368	676			AT4G14368	Regulator of chromosome condensation (RCC1) family protein(AT4G14368)
CpG	255	chr5	23083058	23083538	481	23	-0.932733	-6.10504	0.000125958	0.0124699	Hypomethylated	-30	No	No	No	Yes	Promoter	AT5G57035	2411			AT5G57035	U-box domain-containing protein kinase family protein(AT5G57035)
CpG	270	chr5	18015786	18016559	774	28	-0.938189	-5.98456	0.000173193	0.0150886	Hypomethylated	-30	No	No	No	Yes	Promoter	AT5G44660	264			AT5G44660	uncharacterized protein(AT5G44660)
CpG	341	chr4	419691	420328	638	12	-0.954883	-5.88856	0.000237525	0.0144032	Hypomethylated	-30	No	No	No	Yes	Promoter	AT4G00970	1364	CRK41	Encodes a cysteine-rich receptor-like protein kinase.	CRK41	cysteine-rich RLK (RECEPTOR-like protein kinase) 41(CRK41)
CpG	615	chr1	6132299	6132687	389	17	-0.955613	-5.13779	0.000750424	0.0334588	Hypomethylated	-30	No	No	No	Yes	Promoter	AT1G05333	2658
CpG	664	chr4	18225677	18226017	341	10	-0.947011	-5.15949	0.000950098	0.0310164	Hypomethylated	-30	No	No	No	Yes	Promoter	AT4G39120	1971	HISN7	Encodes a chloroplast-localized member of the myo-inositol monophosphatase family, IMPL2 (myo-Inositol monophosphatase like 2) that seems to have multiple enzymatic activities. It contributes to histidine biosynthesis based on it histidinol-phosphate phosphatase activity. In addition, the protein can act as an inositol monophosphatase and an L-galactose-1-phosphate phosphatase in vitro.	IMPL2	inositol monophosphatase family protein(IMPL2)
CpG	687	chr4	770649	771227	579	17	-0.931556	-5.12773	0.00103647	0.0321358	Hypomethylated	-30	No	No	No	Yes	Promoter	AT4G01790	850			AT4G01790	Ribosomal protein L7Ae/L30e/S12e/Gadd45 family protein(AT4G01790)
CpG	738	chr4	17989715	17990103	389	16	-0.928041	-4.98741	0.00155471	0.0424706	Hypomethylated	-30	No	Yes	No	No	Promoter	AT4G38440	648	IYO		IYO	RPAP1-like, carboxy-terminal protein(IYO)
CpG	112	chr3	2658276	2659119	844	33	-0.925992	-8.92152	3.53707e-05	0.0158419	Hypomethylated	-29	Yes	Yes	No	No	Promoter	AT3G08760	1352	ATSIK	Encodes an osmotic stress-inducible kinase that functions as a negative regulator of osmotic stress signaling in plants.	ATSIK	Protein kinase superfamily protein(ATSIK)
CpG	125	chr4	11563365	11563762	398	15	-0.912457	-6.69481	4.31863e-05	0.00484472	Hypomethylated	-29	No	No	No	Yes	Promoter	AT4G21760	2242	BGLU47		BGLU47	beta-glucosidase 47(BGLU47)
CpG	204	chr3	2466292	2466823	532	25	-0.911491	-8.08488	7.07414e-05	0.016832	Hypomethylated	-29	No	No	No	Yes	Promoter	AT3G07720	1057			AT3G07720	Galactose oxidase/kelch repeat superfamily protein(AT3G07720)
CpG	220	chr5	14794088	14795103	1016	23	-0.910829	-6.29114	7.8724e-05	0.00879287	Hypomethylated	-29	No	No	No	Yes	Promoter	AT5G37350	1269			AT5G37350	Serine/threonine-protein kinase Rio1(AT5G37350)
CpG	307	chr1	22787896	22788185	290	11	-0.903909	-5.97044	0.00019511	0.0181058	Hypomethylated	-29	No	No	No	Yes	Promoter	AT1G61700	884		Protein of unknown function that is homologous to the At1g11475 locus that encodes a non-catalytic subunit common to nuclear DNA-dependent RNA polymerases II, IV and V. Homologous to budding yeast RPB10.	AT1G61700	RNA polymerases N / 8 kDa subunit(AT1G61700)
CpG	365	chr3	7437165	7437651	487	14	-0.903989	-6.21121	0.000247595	0.0301205	Hypomethylated	-29	No	Yes	No	No	Promoter	AT3G21200	1139	GBP		PGR7	proton gradient regulation 7(PGR7)
CpG	451	chr3	1431694	1432163	470	21	-0.909816	-5.80786	0.000371392	0.0317728	Hypomethylated	-29	No	No	No	Yes	Promoter	AT3G05120	1331	ATGID1A	Encodes a gibberellin (GA) receptor ortholog of the rice GA receptor gene (OsGID1). Has GA-binding activity, showing higher affinity to GA4. Interacts with DELLA proteins in vivo in the presence of GA4. The DELLA region alone can interact with GID1A in GA-dependent manner in a Y2H assay.	GID1A	alpha/beta-Hydrolases superfamily protein(GID1A)
CpG	494	chr1	17987849	17988180	332	15	-0.917214	-5.37474	0.000465263	0.02631	Hypomethylated	-29	No	No	No	Yes	Promoter	AT1G48640	1546			AT1G48640	Transmembrane amino acid transporter family protein(AT1G48640)
CpG	601	chr3	19672750	19673409	660	28	-0.897491	-5.42913	0.000689728	0.0473116	Hypomethylated	-29	No	No	No	Yes	Promoter	AT3G53065	24			AT3G53065	D-galactoside/L-rhamnose binding SUEL lectin protein(AT3G53065)
CpG	22	chr1	13106032	13107041	1010	18	-0.888459	-10.7925	1.50085e-05	0.00497102	Hypomethylated	-28	No	No	No	Yes	Promoter	AT1G35537	-436	AtPDFL2.1	Encodes a defensin-like (DEFL) family protein.	AT1G35537	Defensin-like (DEFL) family protein(AT1G35537)
CpG	45	chr5	9871105	9871735	631	26	-0.890832	-7.42251	1.57448e-05	0.00279936	Hypomethylated	-28	No	No	No	Yes	Promoter	AT5G27845	2757			AT5G27845	pseudo(AT5G27845)
CpG	126	chr4	9255397	9255810	414	27	-0.875592	-6.79816	4.31863e-05	0.00484472	Hypomethylated	-28	Yes	Yes	No	No	Promoter	AT4G16380	1194	AtHMP35		AT4G16380	Heavy metal transport/detoxification superfamily protein(AT4G16380)
CpG	127	chr4	6714331	6714937	607	30	-0.867774	-8.19716	4.31863e-05	0.00484472	Hypomethylated	-28	No	No	No	Yes	Promoter	AT4G10955	453	PRLIP9		AT4G10955	alpha/beta-Hydrolases superfamily protein(AT4G10955)
CpG	221	chr5	13864302	13865207	906	24	-0.867118	-6.24858	7.8724e-05	0.00879287	Hypomethylated	-28	No	No	No	Yes	Promoter	AT5G35688	0			AT5G35688	zinc metalloproteinase-like protein(AT5G35688)
CpG	247	chr4	2510271	2510761	491	23	-0.876864	-6.13659	0.000107966	0.00854036	Hypomethylated	-28	No	No	Yes	Yes	Promoter	AT4G04930	1218	DES-1-LIKE	Encodes a sphingolipid delta4-desaturase, involved in sphingolipid biosynthesis. Specifically expressed in floral tissues. Knockout mutants were devoid of sphinga-4,8-dienine in floral tissues.	DES-1-LIKE	fatty acid desaturase family protein(DES-1-LIKE)
CpG	260	chr4	10847371	10847951	581	22	-0.873867	-6.10478	0.000129559	0.00963106	Hypomethylated	-28	No	No	No	Yes	Promoter	AT4G20030	1085			AT4G20030	RNA-binding (RRM/RBD/RNP motifs) family protein(AT4G20030)
CpG	285	chr1	1392940	1393311	372	18	-0.868537	-6.1623	0.000180102	0.0181058	Hypomethylated	-28	No	Yes	No	No	Promoter	AT1G04920	2642	ATSPS3F	Encodes a protein with putative sucrose-phosphate synthase activity.	SPS3F	sucrose phosphate synthase 3F(SPS3F)
CpG	431	chr1	20351343	20351858	516	11	-0.880939	-5.50417	0.000345195	0.0207879	Hypomethylated	-28	No	No	No	Yes	Promoter	AT1G54490	1234	AIN1	Involved in the ethylene response. XRN4 does not appear to regulate ethylene signaling via an RNA-INDUCED SILENCING COMPLEX-based RNA silencing mechanism but acts by independent means. Endogenous suppressor of posttranscriptional gene silencing.	XRN4	exoribonuclease 4(XRN4)
CpG	477	chr1	25247861	25248293	433	10	-0.892494	-5.40526	0.000435246	0.0249165	Hypomethylated	-28	No	No	Yes	No	Promoter	AT1G67400	2898	ELMOD_C		AT1G67400	ELMO/CED-12 family protein(AT1G67400)
CpG	478	chr5	6680489	6680957	469	15	-0.870516	-5.65518	0.000440855	0.0302419	Hypomethylated	-28	No	No	Yes	No	Promoter	AT5G19760	1097			AT5G19760	Mitochondrial substrate carrier family protein(AT5G19760)
CpG	506	chr4	95672	96494	823	19	-0.87716	-5.45088	0.000496642	0.0202933	Hypomethylated	-28	Yes	Yes	No	No	Promoter	AT4G00230	1929	XSP1		XSP1	xylem serine peptidase 1(XSP1)
CpG	514	chr2	15930383	15930962	580	13	-0.88952	-5.79865	0.000507254	0.0425898	Hypomethylated	-28	No	Yes	No	No	Promoter	AT2G38070	1792	OPL2		AT2G38070	LOW protein: UPF0503-like protein, putative (DUF740)(AT2G38070)
CpG	539	chr1	29299851	29300504	654	19	-0.892178	-5.32961	0.000540305	0.0282843	Hypomethylated	-28	No	No	No	Yes	Promoter	AT1G77920	1608	TGA7		TGA7	bZIP transcription factor family protein(TGA7)
CpG	705	chr4	2652382	2652623	242	13	-0.878932	-5.06698	0.00118762	0.035229	Hypomethylated	-28	No	No	No	Yes	Promoter	AT4G05140	585			AT4G05140	Nucleoside transporter family protein(AT4G05140)
CpG	728	chr1	27286856	27287589	734	19	-0.893034	-4.88229	0.00139579	0.0483005	Hypomethylated	-28	No	No	No	Yes	Promoter	AT1G72480	933			AT1G72480	Lung seven transmembrane receptor family protein(AT1G72480)
CpG	46	chr5	5690521	5691381	861	20	-0.861656	-6.89965	1.57448e-05	0.00279936	Hypomethylated	-27	No	No	No	Yes	Promoter	AT5G17300	1539	RVE1	Myb-like transcription factor that regulates hypocotyl growth by regulating free auxin levels in a time-of-day specific manner.	RVE1	Homeodomain-like superfamily protein(RVE1)
CpG	47	chr5	10031156	10032075	920	18	-0.852018	-7.44808	1.57448e-05	0.00279936	Hypomethylated	-27	No	Yes	Yes	No	Promoter	AT5G28030	603	DES1		DES1	L-cysteine desulfhydrase 1(DES1)
CpG	114	chr3	17698303	17699016	714	36	-0.833889	-8.54956	3.53707e-05	0.0158419	Hypomethylated	-27	No	No	No	Yes	Promoter	AT3G07835	99
CpG	128	chr4	11140657	11141369	713	27	-0.863502	-7.80429	4.31863e-05	0.00484472	Hypomethylated	-27	No	No	No	Yes	Promoter	AT4G20800	1048	AtBBE17		AT4G20800	FAD-binding Berberine family protein(AT4G20800)
CpG	129	chr4	14849931	14850483	553	38	-0.846254	-8.15	4.31863e-05	0.00484472	Hypomethylated	-27	No	No	No	Yes	Promoter	AT4G30350	2348	SMXL2		AT4G30350	Double Clp-N motif-containing P-loop nucleoside triphosphate hydrolases superfamily protein(AT4G30350)
CpG	178	chr5	15008553	15009283	731	26	-0.855978	-6.4816	6.29792e-05	0.00844115	Hypomethylated	-27	No	No	No	Yes	Promoter	AT5G37790	1974			AT5G37790	Protein kinase superfamily protein(AT5G37790)
CpG	222	chr5	13588568	13589030	463	28	-0.852035	-6.25439	7.8724e-05	0.00879287	Hypomethylated	-27	No	Yes	No	No	Promoter	AT5G35370	2241			AT5G35370	S-locus lectin protein kinase family protein(AT5G35370)
CpG	223	chr5	7187262	7187846	585	15	-0.851494	-6.31649	7.8724e-05	0.00879287	Hypomethylated	-27	No	No	No	Yes	Promoter	AT5G21140	1850	emb1379		emb1379	embryo defective 1379(emb1379)
CpG	252	chr3	8966609	8967357	749	24	-0.842912	-6.83983	0.000123797	0.0241691	Hypomethylated	-27	No	Yes	No	No	Promoter	AT3G24560	2839	RSY3	Novel gene involved in embryogenesis	RSY3	Adenine nucleotide alpha hydrolases-like superfamily protein(RSY3)
CpG	256	chr5	6328689	6329002	314	17	-0.860026	-6.14801	0.000125958	0.0124699	Hypomethylated	-27	No	No	No	Yes	Promoter	AT5G18950	1187			AT5G18950	Tetratricopeptide repeat (TPR)-like superfamily protein(AT5G18950)
CpG	293	chr2	10232268	10232862	595	18	-0.840977	-6.57434	0.000182611	0.0282724	Hypomethylated	-27	No	No	No	Yes	Promoter	AT2G24070	2614	QWRF4		QWRF4	QWRF motif protein (DUF566)(QWRF4)
CpG	294	chr2	2240837	2242216	1380	14	-0.832754	-7.22371	0.000182611	0.0282724	Hypomethylated	-27	No	No	No	Yes	Promoter	AT2G05845	-2247			AT2G05845	pseudo(AT2G05845)
CpG	374	chr4	5777683	5778370	688	19	-0.835884	-5.80438	0.000259118	0.0144032	Hypomethylated	-27	No	No	No	Yes	Promoter	AT4G09010	1092	APX4	Encodes a protein that was initially believed to act as a microsomal ascorbate peroxidase APX4 but to date, no evidence of enzymatic activity has been found.	TL29	ascorbate peroxidase 4(TL29)
CpG	471	chr5	22584465	22584887	423	12	-0.840987	-5.69952	0.000409365	0.0294743	Hypomethylated	-27	No	No	Yes	No	Promoter	AT5G55810	1518	AtNMNAT	Encodes a bi-functional enzyme that expresses both nicotinamide-nucleotide adenylyltransferase (2.7.7.1) and nicotinate-nucleotide adenylyltransferase (2.7.7.18)activity.	NMNAT	nicotinate/nicotinamide mononucleotide adenyltransferase(NMNAT)
CpG	491	chr4	12937345	12937686	342	11	-0.858037	-5.49232	0.000453456	0.0202741	Hypomethylated	-27	No	No	Yes	No	Promoter	AT4G25270	1224	OTP70		OTP70	Tetratricopeptide repeat (TPR)-like superfamily protein(OTP70)
CpG	495	chr2	585179	585768	590	26	-0.858504	-5.87296	0.000466673	0.0418664	Hypomethylated	-27	No	No	No	Yes	Promoter	AT2G02220	1633	ATPSKR1	Encodes a protein interacting with phytosulfokine, a five amino acid sulfated peptide (YIYTQ).	PSKR1	phytosulfokin receptor 1(PSKR1)
CpG	510	chr5	19125286	19125676	391	11	-0.85642	-5.58387	0.000503834	0.0325141	Hypomethylated	-27	No	Yes	No	No	Promoter	AT5G47080	1018	CKB1	Regulatory subunit beta of casein kinase II. purified CKB1 resulted in up 100-fold stimulation of casein kinase activity compared with the CKA1 activity alone. Forms a tetrameric complex with CKA1 (CKA1(2)CKB1(2)).	CKB1	casein kinase II beta chain 1(CKB1)
CpG	533	chr5	7462288	7462634	347	16	-0.840351	-5.49814	0.000535323	0.0328432	Hypomethylated	-27	No	No	No	Yes	Promoter	AT5G03405	230
CpG	585	chr4	6297822	6298510	689	11	-0.847275	-5.29787	0.000626201	0.0232751	Hypomethylated	-27	No	No	No	Yes	Promoter	AT4G10070	1357	AtKH18		AT4G10070	KH domain-containing protein(AT4G10070)
CpG	613	chr1	25947480	25948214	735	10	-0.84043	-5.151	0.000735416	0.0332695	Hypomethylated	-27	No	No	No	Yes	Promoter	AT1G69030	1126			AT1G69030	BSD domain-containing protein(AT1G69030)
CpG	684	chr1	24294431	24295030	600	21	-0.839592	-5.00039	0.00103559	0.0401842	Hypomethylated	-27	No	No	Yes	Yes	Promoter	AT1G65390	2059	ATPP2-A5		PP2-A5	phloem protein 2 A5(PP2-A5)
CpG	703	chr4	8268054	8268441	388	13	-0.83947	-5.07148	0.00116603	0.0350946	Hypomethylated	-27	No	No	No	Yes	Promoter	AT4G14360	2735			AT4G14360	S-adenosyl-L-methionine-dependent methyltransferases superfamily protein(AT4G14360)
CpG	723	chr4	8433436	8434323	888	10	-0.85578	-5.04252	0.00129559	0.0377065	Hypomethylated	-27	No	Yes	No	No	Promoter	AT4G14720	782	PPD2	PPD2 (and its paralog, PPD1) encode plant-specific putative DNA-binding proteins. Deletion of the PPD locus increases leaf lamina size and results in dome-shaped rather than flat leaves. Siliques are also altered in shape because of extra lamina growth.	AT4G14720	TIFY domain/Divergent CCT motif family protein(AT4G14720)
CpG	48	chr5	24124075	24125047	973	33	-0.806857	-7.42181	1.57448e-05	0.00279936	Hypomethylated	-26	No	No	No	Yes	Promoter	AT5G59900	1670			AT5G59900	Pentatricopeptide repeat (PPR) superfamily protein(AT5G59900)
CpG	49	chr5	6134810	6135614	805	30	-0.806755	-7.20621	1.57448e-05	0.00279936	Hypomethylated	-26	No	No	No	Yes	Promoter	AT5G18490	1193			AT5G18490	vacuolar sorting-associated protein (DUF946)(AT5G18490)
CpG	130	chr4	4802898	4803755	858	34	-0.83079	-6.87522	4.31863e-05	0.00484472	Hypomethylated	-26	No	No	No	Yes	Promoter	AT4G07960	1892	ATCSLC12	Encodes a gene similar to cellulose synthase	CSLC12	Cellulose-synthase-like C12(CSLC12)
CpG	166	chr1	17342242	17343147	906	38	-0.824043	-6.62693	6.00339e-05	0.00927924	Hypomethylated	-26	No	No	No	Yes	Promoter	AT1G47310	0			AT1G47310	signal peptidase I(AT1G47310)
CpG	179	chr5	5028318	5029171	854	23	-0.811881	-6.40422	6.29792e-05	0.00844115	Hypomethylated	-26	No	No	No	Yes	Promoter	AT5G15490	1074	UGD3		UGD3	UDP-glucose 6-dehydrogenase family protein(UGD3)
CpG	213	chr1	18081201	18081613	413	15	-0.808282	-6.44916	7.50424e-05	0.0103872	Hypomethylated	-26	No	No	No	Yes	Promoter	AT1G48880	793	TBL7	Encodes a member of the TBL (TRICHOME BIREFRINGENCE-LIKE) gene family containing a plant-specific DUF231 (domain of unknown function) domain. TBL gene family has 46 members, two of which (TBR/AT5G06700 and TBL3/AT5G01360) have been shown to be involved in the synthesis and deposition of secondary wall cellulose, presumably by influencing the esterification state of pectic polymers. A nomenclature…	TBL7	TRICHOME BIREFRINGENCE-LIKE 7(TBL7)
CpG	248	chr4	8610974	8611596	623	16	-0.811369	-6.13689	0.000107966	0.00854036	Hypomethylated	-26	No	No	No	Yes	Promoter	AT4G15080	1113			AT4G15080	DHHC-type zinc finger family protein(AT4G15080)
CpG	309	chr1	27539666	27540088	423	36	-0.830541	-6.04918	0.00019511	0.0181058	Hypomethylated	-26	Yes	No	No	No	Promoter	AT1G73220	1476	AtOCT1		OCT1	organic cation/carnitine transporter1(OCT1)
CpG	452	chr3	9543205	9543675	471	11	-0.825052	-5.74001	0.000371392	0.0317728	Hypomethylated	-26	No	Yes	No	No	Promoter	AT3G26115	937			AT3G26115	Pyridoxal-5'-phosphate-dependent enzyme family protein(AT3G26115)
CpG	675	chr1	24453166	24454122	957	10	-0.807452	-5.0258	0.00099056	0.0395968	Hypomethylated	-26	No	No	No	Yes	Promoter	AT1G65740	0	AtFDA5		UCL1	ascorbic acid mannose pathway regulator (DUF295)(UCL1)
CpG	729	chr1	25191766	25192285	520	22	-0.82356	-4.88444	0.00139579	0.0483005	Hypomethylated	-26	No	No	No	Yes	Promoter	AT1G67290	955	GLOX1		GLOX1	glyoxal oxidase-related protein(GLOX1)
CpG	76	chr3	22366469	22367033	565	42	-0.794414	-9.56084	1.76853e-05	0.0096183	Hypomethylated	-25	No	No	No	Yes	Promoter	AT3G09415	0
CpG	132	chr4	2325725	2326516	792	30	-0.780715	-8.08663	4.31863e-05	0.00484472	Hypomethylated	-25	No	No	No	Yes	Promoter	AT4G04610	847	APR	Encodes a protein disulfide isomerase-like (PDIL) protein, a member of a multigene family within the thioredoxin (TRX) superfamily. This protein also belongs to the adenosine 5&apos;-phosphosulfate reductase-like (APRL) group.	APR1	APS reductase 1(APR1)
CpG	151	chr1	22982424	22983286	863	32	-0.786928	-7.22487	4.50254e-05	0.00927924	Hypomethylated	-25	No	No	No	Yes	Promoter	AT1G62200	1073	AtNPF8.5		PTR6	Major facilitator superfamily protein(PTR6)
CpG	157	chr5	17170282	17170933	652	31	-0.795178	-6.59181	4.72344e-05	0.00734833	Hypomethylated	-25	No	No	No	Yes	Promoter	AT5G06395	0
CpG	253	chr3	9458228	9458846	619	17	-0.80034	-6.92484	0.000123797	0.0241691	Hypomethylated	-25	No	Yes	Yes	No	Promoter	AT3G25850	108			AT3G25850	Cysteine/Histidine-rich C1 domain family protein(AT3G25850)
CpG	265	chr3	18500691	18501373	683	44	-0.78706	-6.72638	0.000141483	0.0256488	Hypomethylated	-25	No	No	Yes	No	Promoter	AT3G49890	1527			AT3G49890	uncharacterized protein(AT3G49890)
CpG	368	chr1	12971034	12971843	810	10	-0.796206	-5.63877	0.000255144	0.0187794	Hypomethylated	-25	No	No	No	Yes	Promoter	AT1G06857	-215
CpG	466	chr1	23228326	23228721	396	21	-0.778053	-5.42665	0.00039022	0.0224777	Hypomethylated	-25	No	No	No	Yes	Promoter	AT1G08557	0
CpG	567	chr4	9595932	9596548	617	12	-0.797234	-5.31201	0.000583015	0.0220687	Hypomethylated	-25	No	Yes	No	No	Promoter	AT4G17070	1734			AT4G17070	peptidyl-prolyl cis-trans isomerase(AT4G17070)
CpG	609	chr5	17687645	17688044	400	27	-0.769898	-5.28174	0.000724261	0.0380106	Hypomethylated	-25	No	No	No	Yes	Promoter	AT5G43950	624			AT5G43950	vacuolar protein sorting-associated protein (DUF946)(AT5G43950)
CpG	619	chr3	8681192	8681496	305	15	-0.773054	-5.40127	0.00076047	0.0481697	Hypomethylated	-25	No	Yes	No	No	Promoter	AT3G24040	1793			AT3G24040	Core-2/I-branching beta-1,6-N-acetylglucosaminyltransferase family protein(AT3G24040)
CpG	631	chr4	13736915	13737329	415	21	-0.791577	-5.21527	0.000798946	0.0280085	Hypomethylated	-25	No	No	Yes	No	Promoter	AT4G27480	1586			AT4G27480	Core-2/I-branching beta-1,6-N-acetylglucosaminyltransferase family protein(AT4G27480)
CpG	730	chr1	18686592	18687401	810	11	-0.794066	-4.86662	0.00144081	0.0493067	Hypomethylated	-25	No	No	No	Yes	Promoter	AT1G07633	0
CpG	52	chr5	10015679	10016670	992	48	-0.752268	-8.22637	1.57448e-05	0.00279936	Hypomethylated	-24	Yes	Yes	No	No	Promoter	AT5G27990	0			AT5G27990	Pre-rRNA-processing protein TSR2, conserved region(AT5G27990)
CpG	133	chr4	9959052	9959847	796	35	-0.748056	-7.58808	4.31863e-05	0.00484472	Hypomethylated	-24	No	No	Yes	Yes	Promoter	AT4G17915	744			AT4G17915	miscRNA(AT4G17915)
CpG	168	chr1	23049006	23049939	934	46	-0.766821	-6.68219	6.00339e-05	0.00927924	Hypomethylated	-24	No	No	Yes	Yes	Promoter	AT1G62330	2238			AT1G62330	O-fucosyltransferase family protein(AT1G62330)
CpG	225	chr5	7631040	7631806	767	30	-0.75524	-6.25892	7.8724e-05	0.00879287	Hypomethylated	-24	No	No	No	Yes	Promoter	AT5G22840	1574	SRPK3		AT5G22840	Protein kinase superfamily protein(AT5G22840)
CpG	226	chr5	23386824	23387563	740	40	-0.747322	-6.2699	7.8724e-05	0.00879287	Hypomethylated	-24	No	Yes	No	No	Promoter	AT5G57710	2569	SMAX1		AT5G57710	Double Clp-N motif-containing P-loop nucleoside triphosphate hydrolases superfamily protein(AT5G57710)
CpG	257	chr5	4224639	4225361	723	25	-0.767563	-6.14308	0.000125958	0.0124699	Hypomethylated	-24	No	No	No	Yes	Promoter	AT5G13230	2127			AT5G13230	Tetratricopeptide repeat (TPR)-like superfamily protein(AT5G13230)
CpG	258	chr5	22063145	22063827	683	16	-0.752687	-6.09702	0.000125958	0.0124699	Hypomethylated	-24	No	No	No	Yes	Promoter	AT5G54320	340	AtDOB8		AT5G54320	hypothetical protein (DUF295)(AT5G54320)
CpG	272	chr5	3202633	3203506	874	25	-0.746297	-6.05227	0.000173193	0.0150886	Hypomethylated	-24	No	No	No	Yes	Promoter	AT5G10200	1137	SAV4		AT5G10200	ARM-repeat/Tetratricopeptide repeat (TPR)-like protein(AT5G10200)
CpG	310	chr1	23000622	23001282	661	20	-0.742819	-5.9899	0.00019511	0.0181058	Hypomethylated	-24	No	No	No	Yes	Promoter	AT1G62262	814	SLAH4	Predicted to encode a protein with similarity to the SLAC1 protein involved in ion homeostasis in guard cells.	SLAH4	SLAC1 homologue 4(SLAH4)
CpG	349	chr1	26722422	26722729	308	18	-0.759153	-5.78622	0.000240136	0.0181058	Hypomethylated	-24	No	No	No	Yes	Promoter	AT1G70870	-859			AT1G70870	Polyketide cyclase/dehydrase and lipid transport superfamily protein(AT1G70870)
CpG	409	chr1	19274868	19276131	1264	19	-0.766756	-5.57725	0.000315178	0.0201584	Hypomethylated	-24	No	No	No	Yes	Promoter	AT1G51890	2588			AT1G51890	Leucine-rich repeat protein kinase family protein(AT1G51890)
CpG	479	chr5	18545118	18545974	857	42	-0.756825	-5.65079	0.000440855	0.0302419	Hypomethylated	-24	No	No	No	Yes	Promoter	AT5G45720	1231			AT5G45720	AAA-type ATPase family protein(AT5G45720)
CpG	502	chr3	18496628	18497670	1043	31	-0.753467	-5.64384	0.000477504	0.0395187	Hypomethylated	-24	No	Yes	No	No	Promoter	AT3G49880	446	GH43B		AT3G49880	glycosyl hydrolase family protein 43(AT3G49880)
CpG	545	chr1	3567196	3567684	489	13	-0.746856	-5.29281	0.000555314	0.0282843	Hypomethylated	-24	No	No	Yes	Yes	Promoter	AT1G10730	1939	AP1M1		AT1G10730	Clathrin adaptor complexes medium subunit family protein(AT1G10730)
CpG	551	chr3	10163409	10164270	862	12	-0.756521	-5.52296	0.000565931	0.0406509	Hypomethylated	-24	No	No	No	Yes	Promoter	AT3G27470	449			AT3G27470	lysine ketoglutarate reductase trans-splicing protein (DUF707)(AT3G27470)
CpG	661	chr5	7870801	7871535	735	25	-0.746407	-5.17504	0.000944688	0.0457229	Hypomethylated	-24	No	No	Yes	No	Promoter	AT5G23390	2970			AT5G23390	polygalacturonase inhibitor (DUF639)(AT5G23390)
CpG	681	chr4	16948350	16948815	466	10	-0.743896	-5.14874	0.00101488	0.0321358	Hypomethylated	-24	No	No	No	Yes	Promoter	AT4G35780	1805	STY17		STY17	ACT-like protein tyrosine kinase family protein(STY17)
CpG	23	chr1	28883654	28884371	718	46	-0.713706	-8.78144	1.50085e-05	0.00497102	Hypomethylated	-23	Yes	Yes	No	No	Promoter	AT1G76900	2115	AtTLP1	Member of TLP family	TLP1	tubby like protein 1(TLP1)
CpG	105	chr4	11657567	11658047	481	21	-0.721205	-8.70739	2.15931e-05	0.00484472	Hypomethylated	-23	No	No	No	Yes	Promoter	AT4G21990	1058	APR3	Encodes a protein disulfide isomerase-like (PDIL) protein, a member of a multigene family within the thioredoxin (TRX) superfamily. This protein also belongs to the adenosine 5&apos;-phosphosulfate reductase-like (APRL) group.	APR3	APS reductase 3(APR3)
CpG	158	chr5	8951712	8952614	903	33	-0.736685	-6.60764	4.72344e-05	0.00734833	Hypomethylated	-23	No	Yes	No	No	Promoter	AT5G25640	-539			AT5G25640	Rhomboid-related intramembrane serine protease family protein(AT5G25640)
CpG	175	chr2	16590227	16590657	431	20	-0.715517	-7.95199	6.08704e-05	0.0221467	Hypomethylated	-23	No	No	No	Yes	Promoter	AT2G39770	1671	CYT1	Encodes a GDP-mannose pyrophosphorylase/ mannose-1-pyrophosphatase. This enzyme provides GDP-mannose, which is used for cell wall carbohydrate biosynthesis and protein glycosylation as well as for ascorbate (vitamin C) biosynthesis. Mutations in this gene confer hypersensitivity to NH4+.	CYT1	Glucose-1-phosphate adenylyltransferase family protein(CYT1)
CpG	207	chr3	16526938	16528681	1744	40	-0.725339	-7.69212	7.07414e-05	0.016832	Hypomethylated	-23	No	No	No	Yes	Promoter	AT3G45140	1693	ATLOX2	Chloroplast lipoxygenase required for wound-induced jasmonic acid accumulation in Arabidopsis.Mutants are resistant to Staphylococcus aureus and accumulate salicylic acid upon infection.	LOX2	lipoxygenase 2(LOX2)
CpG	231	chr4	16252492	16252882	391	21	-0.715153	-6.22278	8.63726e-05	0.00710558	Hypomethylated	-23	No	No	Yes	No	Promoter	AT4G33900	0			AT4G33900	Galactose oxidase/kelch repeat superfamily protein(AT4G33900)
CpG	238	chr5	33652	34361	710	21	-0.710988	-6.21068	9.44688e-05	0.0104179	Hypomethylated	-23	No	No	Yes	No	Promoter	AT5G01090	872			AT5G01090	Concanavalin A-like lectin family protein(AT5G01090)
CpG	254	chr3	1284533	1285436	904	34	-0.722341	-6.93842	0.000123797	0.0241691	Hypomethylated	-23	No	Yes	No	No	Promoter	AT3G04717	0			AT3G04717	miscRNA(AT3G04717)
CpG	268	chr5	8117359	8118187	829	25	-0.707202	-6.07437	0.000157448	0.0150886	Hypomethylated	-23	No	No	No	Yes	Promoter	AT5G24020	694	ARC11	Encodes a Ca2+ dependent ATPase required for correct positioning of the chloroplast division apparatus. Its ATPase activity is stimulated by AtMinE1, a topological specificity factor.	MIND	septum site-determining protein (MIND)(MIND)
CpG	312	chr1	19489957	19490393	437	21	-0.707184	-5.97323	0.00019511	0.0181058	Hypomethylated	-23	No	No	No	Yes	Promoter	AT1G07803	0
CpG	330	chr1	11488651	11489329	679	18	-0.729334	-5.93999	0.000225127	0.0181058	Hypomethylated	-23	No	No	No	Yes	Promoter	AT1G31990	649			AT1G31990	uncharacterized protein(AT1G31990)
CpG	367	chr5	6297432	6297762	331	10	-0.734092	-5.87349	0.000251917	0.0207047	Hypomethylated	-23	No	No	No	Yes	Promoter	AT5G18870	-624	NSH5		NSH5	Inosine-uridine preferring nucleoside hydrolase family protein(NSH5)
CpG	420	chr4	103032	103558	527	16	-0.731305	-5.63144	0.000323897	0.0161165	Hypomethylated	-23	No	No	No	Yes	Promoter	AT4G00236	964			AT4G00236	miscRNA(AT4G00236)
CpG	439	chr4	13824759	13825324	566	13	-0.723537	-5.62109	0.00034549	0.0167848	Hypomethylated	-23	No	No	No	Yes	Promoter	AT4G27690	1249	VPS26B		VPS26B	vacuolar protein sorting 26B(VPS26B)
CpG	442	chr5	872320	872902	583	37	-0.722054	-5.7869	0.000346386	0.026241	Hypomethylated	-23	Yes	Yes	No	No	Promoter	AT5G03490	1116	UGT89A2		AT5G03490	UDP-Glycosyltransferase superfamily protein(AT5G03490)
CpG	453	chr3	7539882	7540717	836	11	-0.734224	-5.79299	0.000371392	0.0317728	Hypomethylated	-23	No	No	No	Yes	Promoter	AT3G21420	-667	LBO1		LBO1	2-oxoglutarate (2OG) and Fe(II)-dependent oxygenase superfamily protein(LBO1)
CpG	485	chr2	6673545	6674154	610	11	-0.731295	-5.9171	0.000446383	0.0406023	Hypomethylated	-23	No	No	No	Yes	Promoter	AT2G15330	0			AT2G15330	pseudo(AT2G15330)
CpG	542	chr5	8186999	8187377	379	16	-0.722189	-5.47989	0.000551068	0.0331414	Hypomethylated	-23	No	No	No	Yes	Promoter	AT5G24160	-295	SQE6		SQE6	squalene monooxygenase 6(SQE6)
CpG	546	chr1	9980791	9981422	632	17	-0.72237	-5.29454	0.000555314	0.0282843	Hypomethylated	-23	No	No	No	Yes	Promoter	AT1G28420	1313	HB-1		HB-1	homeobox-1(HB-1)
CpG	568	chr4	5322682	5323786	1105	14	-0.728645	-5.31491	0.000583015	0.0220687	Hypomethylated	-23	No	No	No	Yes	Promoter	AT4G08400	1586	EXT7		AT4G08400	Proline-rich extensin-like family protein(AT4G08400)
CpG	569	chr4	14535828	14536459	632	19	-0.723299	-5.30677	0.000583015	0.0220687	Hypomethylated	-23	No	No	No	Yes	Promoter	AT4G29670	897	ACHT2	Encodes a member of the thioredoxin family protein. Located in the chloroplast. Shows high activity towards the chloroplast 2-Cys peroxiredoxin A, and poor activity towards the chloroplast NADP-malate dehydrogenase.	ACHT2	atypical CYS HIS rich thioredoxin 2(ACHT2)
CpG	575	chr2	8328468	8328839	372	17	-0.71668	-5.66998	0.000588414	0.0458753	Hypomethylated	-23	No	No	No	Yes	Promoter	AT2G19190	1105	FRK1	Receptor-like protein kinase. Involved in early defense signaling.	FRK1	FLG22-induced receptor-like kinase 1(FRK1)
CpG	590	chr1	10940094	10940690	597	25	-0.72939	-5.20504	0.000630356	0.0296747	Hypomethylated	-23	No	No	Yes	No	Promoter	AT1G30810	1278	JMJ18		JMJ18	Transcription factor jumonji (jmj) family protein / zinc finger (C5HC2 type) family protein(JMJ18)
CpG	607	chr5	10261168	10261943	776	31	-0.736709	-5.31015	0.000708516	0.0376378	Hypomethylated	-23	No	No	No	Yes	Promoter	AT5G28270	-697			AT5G28270	pseudo(AT5G28270)
CpG	635	chr1	19045995	19046681	687	19	-0.722891	-5.10943	0.000810458	0.0352873	Hypomethylated	-23	No	Yes	Yes	No	Promoter	AT1G51370	936			AT1G51370	F-box/RNI-like/FBD-like domains-containing protein(AT1G51370)
CpG	644	chr1	5205211	5205451	241	10	-0.713137	-5.0704	0.000870492	0.0366952	Hypomethylated	-23	No	No	Yes	Yes	Promoter	AT1G15125	899			AT1G15125	S-adenosyl-L-methionine-dependent methyltransferases superfamily protein(AT1G15125)
CpG	647	chr5	21555218	21556016	799	26	-0.719611	-5.20779	0.000881709	0.0444015	Hypomethylated	-23	No	No	No	Yes	Promoter	AT5G53150	1863			AT5G53150	DnaJ heat shock amino-terminal domain protein(AT5G53150)
CpG	717	chr4	18222621	18223244	624	22	-0.737719	-5.04599	0.001274	0.0372538	Hypomethylated	-23	No	No	Yes	No	Promoter	AT4G39110	1994	BUPS1		AT4G39110	Malectin/receptor-like protein kinase family protein(AT4G39110)
CpG	735	chr4	2372133	2373095	963	13	-0.717936	-5.00737	0.00146833	0.0415579	Hypomethylated	-23	No	No	No	Yes	Promoter	AT4G04680	0			AT4G04680	Rix1 complex component(AT4G04680)
CpG	53	chr5	21091309	21092324	1016	43	-0.703367	-6.94522	1.57448e-05	0.00279936	Hypomethylated	-22	No	No	Yes	No	Promoter	AT5G51890	86	Prx66	Encodes peroxidase involved in the lignification of tracheary elements (TE) in roots	AT5G51890	Peroxidase superfamily protein(AT5G51890)
CpG	134	chr4	11156554	11157054	501	30	-0.69828	-7.26394	4.31863e-05	0.00484472	Hypomethylated	-22	No	Yes	No	No	Promoter	AT4G20830	1101	AtBBE19		AT4G20830	FAD-binding Berberine family protein(AT4G20830)
CpG	135	chr4	7215403	7216055	653	30	-0.69472	-7.44282	4.31863e-05	0.00484472	Hypomethylated	-22	No	No	No	Yes	Promoter	AT4G12040	826	AtSAP7		SAP7	A20/AN1-like zinc finger family protein(SAP7)
CpG	136	chr4	5197022	5197781	760	27	-0.692783	-6.74041	4.31863e-05	0.00484472	Hypomethylated	-22	No	No	No	Yes	Promoter	AT4G08250	235			AT4G08250	GRAS family transcription factor(AT4G08250)
CpG	137	chr4	8465597	8466451	855	28	-0.678484	-6.67484	4.31863e-05	0.00484472	Hypomethylated	-22	No	No	No	Yes	Promoter	AT4G14746	-1112			AT4G14746	neurogenic locus notch-like protein(AT4G14746)
CpG	214	chr1	17568201	17569092	892	24	-0.689809	-6.4933	7.50424e-05	0.0103872	Hypomethylated	-22	No	No	No	Yes	Promoter	AT1G47740	1690			AT1G47740	PPPDE putative thiol peptidase family protein(AT1G47740)
CpG	261	chr4	7608368	7609174	807	27	-0.680781	-6.09485	0.000129559	0.00963106	Hypomethylated	-22	No	No	No	Yes	Promoter	AT4G13030	1127			AT4G13030	P-loop containing nucleoside triphosphate hydrolases superfamily protein(AT4G13030)
CpG	280	chr3	319962	320747	786	30	-0.689036	-6.57721	0.000176853	0.0269312	Hypomethylated	-22	No	Yes	No	No	Promoter	AT3G01065	0
CpG	295	chr2	987706	989747	2042	63	-0.699498	-7.1934	0.000182611	0.0282724	Hypomethylated	-22	No	Yes	Yes	No	Promoter	AT2G03260	946			AT2G03260	EXS (ERD1/XPR1/SYG1) family protein(AT2G03260)
CpG	331	chr1	20755324	20756214	891	22	-0.686957	-5.85452	0.000225127	0.0181058	Hypomethylated	-22	No	Yes	Yes	No	Promoter	AT1G55560	442	sks14		sks14	SKU5 similar 14(sks14)
CpG	425	chr3	7334270	7334952	683	28	-0.684042	-5.85037	0.000336022	0.0317728	Hypomethylated	-22	No	No	No	Yes	Promoter	AT3G20930	2608	ORRM1		AT3G20930	RNA-binding (RRM/RBD/RNP motifs) family protein(AT3G20930)
CpG	487	chr2	1568759	1569459	701	25	-0.692588	-5.94458	0.000446383	0.0406023	Hypomethylated	-22	No	No	No	Yes	Promoter	AT2G04500	480			AT2G04500	Cysteine/Histidine-rich C1 domain family protein(AT2G04500)
CpG	515	chr2	6815494	6816084	591	17	-0.678066	-5.8369	0.000507254	0.0425898	Hypomethylated	-22	No	No	No	Yes	Promoter	AT2G15630	1041			AT2G15630	Pentatricopeptide repeat (PPR) superfamily protein(AT2G15630)
CpG	528	chr3	21959981	21960592	612	27	-0.693789	-5.60083	0.00053056	0.0406509	Hypomethylated	-22	No	No	No	Yes	Promoter	AT3G59420	2588	ACR4	Encodes a membrane localized protein with similarity to receptor kinases which is involved in epidermal cell differentiation. Flowers of mutants have disorganized ovule integument growth and abnormal sepal margins. In the roots, mutants initiate more lateral roots but fewer laterals actually emerge due to defects in lateral root formation. Mutants also display disorganized columella. The root phe…	CR4	crinkly4(CR4)
CpG	587	chr5	10720792	10721489	698	28	-0.675981	-5.35957	0.000629792	0.0351715	Hypomethylated	-22	No	No	No	Yes	Promoter	AT5G28680	872	ANX2	Receptor-like kinase required for maintenance of pollen tube growth. Display polar localization at the plasma membrane of the pollen tube tip.	ANX2	Malectin/receptor-like protein kinase family protein(ANX2)
CpG	618	chr5	26477111	26477501	391	19	-0.678115	-5.25746	0.000755751	0.0389592	Hypomethylated	-22	No	Yes	No	No	Promoter	AT5G09595	245
CpG	693	chr5	2153564	2154160	597	18	-0.67608	-5.12648	0.00107065	0.0493517	Hypomethylated	-22	No	No	No	Yes	Promoter	AT5G06950	2724	AHBP-1B	Transcription factor of the BZIP family that has high affinity for C-box motifs. Interacts with NPR1 and may regulate PR gene expression. Phosphorylated by a CK2-like protein in vitro. Phosphorylation is enhanced by salicylic acid treatment.	AHBP-1B	bZIP transcription factor family protein(AHBP-1B)
CpG	696	chr1	20261438	20261872	435	17	-0.693562	-4.98285	0.00111063	0.0423867	Hypomethylated	-22	No	No	No	Yes	Promoter	AT1G54270	1891	EIF4A-2	Member of eIF4A - eukaryotic initiation factor 4A	EIF4A-2	eif4a-2(EIF4A-2)
CpG	77	chr3	10525544	10526352	809	29	-0.671489	-22.7173	1.76853e-05	0.0096183	Hypomethylated	-21	No	No	No	Yes	Promoter	AT3G28220	1363			AT3G28220	TRAF-like family protein(AT3G28220)
CpG	93	chr2	10289628	10290141	514	25	-0.659822	-15.8919	2.02901e-05	0.00781648	Hypomethylated	-21	No	No	No	Yes	Promoter	AT2G24200	0	atLAP1		LAP1	Cytosol aminopeptidase family protein(LAP1)
CpG	138	chr4	16290650	16291380	731	28	-0.667985	-6.82574	4.31863e-05	0.00484472	Hypomethylated	-21	No	Yes	Yes	No	Promoter	AT4G33990	1536	EMB2758		EMB2758	Tetratricopeptide repeat (TPR)-like superfamily protein(EMB2758)
CpG	139	chr4	9523976	9524430	455	11	-0.661901	-7.63524	4.31863e-05	0.00484472	Hypomethylated	-21	No	No	No	Yes	Promoter	AT4G16920	1261			AT4G16920	Disease resistance protein (TIR-NBS-LRR class) family(AT4G16920)
CpG	140	chr4	11042133	11042746	614	38	-0.659717	-7.65334	4.31863e-05	0.00484472	Hypomethylated	-21	Yes	Yes	No	No	Promoter	AT4G20510	476			AT4G20510	pseudo(AT4G20510)
CpG	171	chr1	12277683	12278472	790	15	-0.647808	-6.58152	6.00339e-05	0.00927924	Hypomethylated	-21	No	No	No	Yes	Promoter	AT1G33820	979			AT1G33820	uncharacterized protein(AT1G33820)
CpG	191	chr4	9116487	9117936	1450	57	-0.668669	-6.61226	6.47794e-05	0.00562942	Hypomethylated	-21	No	Yes	Yes	No	Promoter	AT4G16120	1443	ATSEB1	Putative membrane-anchored cell wall protein	COBL7	COBRA-like protein-7 precursor(COBL7)
CpG	242	chr1	23090241	23091165	925	36	-0.656614	-6.33989	0.000105059	0.0133469	Hypomethylated	-21	No	No	No	Yes	Promoter	AT1G62400	631	HT1		HT1	Protein kinase superfamily protein(HT1)
CpG	286	chr1	28077121	28078130	1010	30	-0.660737	-6.12442	0.000180102	0.0181058	Hypomethylated	-21	Yes	Yes	No	No	Promoter	AT1G74720	2194	MCTP15	Encodes a putative transmembrane protein carrying four C(2) domains, suggesting that QKY may function in membrane trafficking in a Ca(2+)-dependent fashion. Mutant analysis shows that this gene is involved in organ development.	QKY	C2 calcium/lipid-binding plant phosphoribosyltransferase family protein(QKY)
CpG	297	chr2	17058299	17058957	659	32	-0.671267	-6.97481	0.000182611	0.0282724	Hypomethylated	-21	No	Yes	No	No	Promoter	AT2G40890	1695	CYP98A3	Encodes coumarate 3-hydroxylase (C3H), a P450-dependent monooxygenase. Involved in lignin biosynthesis and flavonoid biosynthesis. Also affects the biosynthesis of coumarins such as scopoletin and scopolin as a branching-out-pathway from the phenylpropanoid acid level.	CYP98A3	cytochrome P450, family 98, subfamily A, polypeptide 3(CYP98A3)
CpG	298	chr2	11275005	11275510	506	25	-0.652469	-6.69161	0.000182611	0.0282724	Hypomethylated	-21	No	No	No	Yes	Promoter	AT2G26510	1163	NAT3	Permease	PDE135	Xanthine/uracil permease family protein(PDE135)
CpG	370	chr1	572354	573147	794	39	-0.657876	-5.64678	0.000255144	0.0187794	Hypomethylated	-21	No	Yes	No	No	Promoter	AT1G02660	1938	PLIP2		AT1G02660	alpha/beta-Hydrolases superfamily protein(AT1G02660)
CpG	398	chr3	16361784	16362488	705	20	-0.659866	-5.93986	0.000300651	0.0301205	Hypomethylated	-21	No	No	No	Yes	Promoter	AT3G44820	2262			AT3G44820	Phototropic-responsive NPH3 family protein(AT3G44820)
CpG	410	chr1	22689524	22690080	557	13	-0.672293	-5.57123	0.000315178	0.0201584	Hypomethylated	-21	No	No	No	Yes	Promoter	AT1G61490	0			AT1G61490	S-locus lectin protein kinase family protein(AT1G61490)
CpG	432	chr1	20369908	20370693	786	26	-0.673874	-5.48794	0.000345195	0.0207879	Hypomethylated	-21	No	No	No	Yes	Promoter	AT1G54550	257			AT1G54550	F-box and associated interaction domains-containing protein(AT1G54550)
CpG	454	chr3	4949564	4950176	613	25	-0.670213	-5.7693	0.000371392	0.0317728	Hypomethylated	-21	No	No	No	Yes	Promoter	AT3G14730	1170			AT3G14730	Pentatricopeptide repeat (PPR) superfamily protein(AT3G14730)
CpG	455	chr3	19315251	19315765	515	16	-0.648198	-5.73482	0.000371392	0.0317728	Hypomethylated	-21	No	Yes	No	No	Promoter	AT3G52080	285	chx28	Encodes a cation:proton exchanger expressed in pollen	chx28	cation/hydrogen exchanger 28(chx28)
CpG	497	chr4	13719770	13720419	650	22	-0.646652	-5.48423	0.000475049	0.0202933	Hypomethylated	-21	No	No	No	Yes	Promoter	AT4G27430	1763	CIP7	Positive regulator of light-regulated genes. Novel nuclear protein which requires light for its high level expression.	CIP7	COP1-interacting protein 7(CIP7)
CpG	529	chr3	529000	529619	620	22	-0.67235	-5.58882	0.00053056	0.0406509	Hypomethylated	-21	No	No	Yes	No	Promoter	AT3G02530	2993	CCT6-2		AT3G02530	TCP-1/cpn60 chaperonin family protein(AT3G02530)
CpG	552	chr3	16418801	16419695	895	13	-0.670653	-5.53891	0.000565931	0.0406509	Hypomethylated	-21	No	Yes	Yes	No	Promoter	AT3G44950	-1350			AT3G44950	glycine-rich protein(AT3G44950)
CpG	560	chr1	19030410	19031142	733	11	-0.647176	-5.28277	0.000570322	0.0282843	Hypomethylated	-21	No	No	No	Yes	Promoter	AT1G51340	0	MATE		AT1G51340	MATE efflux family protein(AT1G51340)
CpG	586	chr4	17602431	17603257	827	22	-0.662455	-5.29881	0.000626201	0.0232751	Hypomethylated	-21	No	No	Yes	No	Promoter	AT4G37440	1246			AT4G37440	uncharacterized protein(AT4G37440)
CpG	605	chr3	16326532	16327447	916	11	-0.6452	-5.42353	0.000707414	0.0476659	Hypomethylated	-21	No	No	No	Yes	Promoter	AT3G44785	1001			AT3G44785	Zinc finger C-x8-C-x5-C-x3-H type family protein(AT3G44785)
CpG	624	chr1	25494054	25494414	361	13	-0.656438	-5.12668	0.000765432	0.0339647	Hypomethylated	-21	No	No	No	Yes	Promoter	AT1G68010	861	ATHPR1	Encodes hydroxypyruvate reductase.	HPR	hydroxypyruvate reductase(HPR)
CpG	636	chr3	17119925	17120872	948	22	-0.654499	-5.32363	0.000813526	0.0499531	Hypomethylated	-21	No	No	No	Yes	Promoter	AT3G46500	0			AT3G46500	2-oxoglutarate (2OG) and Fe(II)-dependent oxygenase superfamily protein(AT3G46500)
CpG	662	chr5	19368303	19369441	1139	21	-0.666166	-5.17429	0.000944688	0.0457229	Hypomethylated	-21	No	No	No	Yes	Promoter	AT5G47820	2170	FRA1	Encodes a kinesin-like protein with an N-terminal microtubule binding motor domain. Protein is localized to the periphery of the cytoplasm and mutants in the gene exhibit altered orientation of cellulose microfibrils and reduced mechanical strength of fibers.	FRA1	P-loop containing nucleoside triphosphate hydrolases superfamily protein(FRA1)
CpG	704	chr4	13822451	13823089	639	19	-0.673955	-5.07525	0.00116603	0.0350946	Hypomethylated	-21	No	No	No	Yes	Promoter	AT4G27680	1432			AT4G27680	P-loop containing nucleoside triphosphate hydrolases superfamily protein(AT4G27680)
CpG	732	chr1	5839280	5840000	721	17	-0.652594	-4.86267	0.00144081	0.0493067	Hypomethylated	-21	No	No	No	Yes	Promoter	AT1G17070	1690	NTR1		STIPL1	GC-rich sequence DNA-binding factor-like protein with Tuftelin interacting domain-containing protein(STIPL1)
CpG	24	chr1	24353294	24354237	944	30	-0.616622	-10.6935	1.50085e-05	0.00497102	Hypomethylated	-20	No	No	No	Yes	Promoter	AT1G65490	-409	STMP5		AT1G65490	uncharacterized protein(AT1G65490)
CpG	54	chr5	8968279	8969055	777	30	-0.624256	-9.32565	1.57448e-05	0.00279936	Hypomethylated	-20	No	Yes	No	No	Promoter	AT5G25760	624	APEM7	Mutant displays sucrose-dependent seedling development and reduced lateral root production. PEX4 interacts with PEX22 in a yeast two-hybrid. Necessary for peroxisome biogenesis. The PEX4 and PEX22 pair may be important during the remodeling of peroxisome matrix contents as glyoxysomes transition to leaf peroxisomes.	PEX4	peroxin4(PEX4)
CpG	55	chr5	22900088	22900935	848	28	-0.62071	-7.32658	1.57448e-05	0.00279936	Hypomethylated	-20	No	No	No	Yes	Promoter	AT5G56560	364			AT5G56560	FBD, F-box and Leucine Rich Repeat domains containing protein(AT5G56560)
CpG	172	chr1	24666561	24667802	1242	56	-0.640926	-6.84837	6.00339e-05	0.00927924	Hypomethylated	-20	Yes	Yes	No	No	Promoter	AT1G66210	1048			AT1G66210	Subtilisin-like serine endopeptidase family protein(AT1G66210)
CpG	180	chr5	10722745	10723592	848	35	-0.618423	-6.45982	6.29792e-05	0.00844115	Hypomethylated	-20	No	No	No	Yes	Promoter	AT5G28690	50			AT5G28690	carboxylate clamp-TPR protein (DUF1685)(AT5G28690)
CpG	193	chr4	10535730	10536229	500	25	-0.613282	-6.56524	6.47794e-05	0.00562942	Hypomethylated	-20	No	Yes	No	No	Promoter	AT4G19260	2434			AT4G19260	Galactose oxidase/kelch repeat superfamily protein(AT4G19260)
CpG	234	chr3	15647707	15648692	986	33	-0.61689	-7.18336	8.84267e-05	0.0187022	Hypomethylated	-20	No	No	No	Yes	Promoter	AT3G43760	730			AT3G43760	pseudo(AT3G43760)
CpG	249	chr5	22663459	22664411	953	37	-0.625079	-6.1555	0.000110214	0.0117095	Hypomethylated	-20	No	No	No	Yes	Promoter	AT5G55960	927			AT5G55960	transmembrane protein C9orf5 protein(AT5G55960)
CpG	354	chr1	20787554	20788340	787	23	-0.643288	-5.70142	0.000240136	0.0181058	Hypomethylated	-20	No	No	No	Yes	Promoter	AT1G55620	2868	ATCLC-F	Encodes a chloride channel protein that has been localized to the chloroplast and golgi apparatus. Complements yeast gef1 mutant and therefor may function to acidify the golgi lumen.	CLC-F	chloride channel F(CLC-F)
CpG	378	chr4	13225606	13225981	376	13	-0.638535	-5.72899	0.000259118	0.0144032	Hypomethylated	-20	No	No	No	Yes	Promoter	AT4G26090	1268	RPS2	Encodes a plasma membrane protein with leucine-rich repeat, leucine zipper, and P loop domains that confers resistance to Pseudomonas syringae infection by interacting with the avirulence gene avrRpt2. RPS2 protein interacts directly with plasma membrane associated protein RIN4 and this interaction is disrupted by avrRpt2.	RPS2	NB-ARC domain-containing disease resistance protein(RPS2)
CpG	385	chr3	5975034	5975617	584	18	-0.642194	-6.08507	0.00026528	0.0301205	Hypomethylated	-20	No	Yes	Yes	No	Promoter	AT3G17450	594			AT3G17450	hAT dimerization domain-containing protein(AT3G17450)
CpG	404	chr5	8750994	8751723	730	27	-0.638818	-5.79764	0.000314896	0.0247151	Hypomethylated	-20	No	No	No	Yes	Promoter	AT5G25250	1314	FLOT1		FLOT1	SPFH/Band 7/PHB domain-containing membrane-associated protein family(FLOT1)
CpG	421	chr4	6142035	6142900	866	14	-0.643204	-5.63352	0.000323897	0.0161165	Hypomethylated	-20	No	No	No	Yes	Promoter	AT4G09740	2103	AtGH9B14		GH9B14	glycosyl hydrolase 9B14(GH9B14)
CpG	433	chr1	22854633	22855286	654	26	-0.642414	-5.48413	0.000345195	0.0207879	Hypomethylated	-20	No	No	No	Yes	Promoter	AT1G61850	-465	PLAI	Encodes a non-specific lipase that hydrolyzes phospholipids as well as galactolipids, at both sn-1 and sn-2 positions. Involved in basal jasmonic acid biosynthesis by releasing the precursor fatty acid from membrane lipids. Mutant plants were impacted in resistance to fungus B. cinerea.	AT1G61850	phospholipase A I-like protein(AT1G61850)
CpG	434	chr1	11587947	11588398	452	25	-0.641097	-5.50698	0.000345195	0.0207879	Hypomethylated	-20	No	No	No	Yes	Promoter	AT1G32180	1253	ATCSLD6	Encodes a gene similar to cellulose synthase	CSLD6	cellulose synthase-like D6(CSLD6)
CpG	511	chr5	17815012	17815507	496	25	-0.621025	-5.56485	0.000503834	0.0325141	Hypomethylated	-20	No	No	No	Yes	Promoter	AT5G44230	768			AT5G44230	Pentatricopeptide repeat (PPR) superfamily protein(AT5G44230)
CpG	527	chr2	14051969	14053127	1159	14	-0.642101	-5.75596	0.000527544	0.0431861	Hypomethylated	-20	No	No	No	Yes	Promoter	AT2G33160	-277	NMA		AT2G33160	glycoside hydrolase family 28 protein / polygalacturonase (pectinase) family protein(AT2G33160)
CpG	553	chr3	19357539	19358130	592	10	-0.638084	-5.57778	0.000565931	0.0406509	Hypomethylated	-20	No	No	No	Yes	Promoter	AT3G52190	-278	AtPHF1	Encodes a plant specific protein structurally related to the SEC12 proteins of the early secretory pathway. Mutation of PHF1 impairs Pi transport. Expression was detected in all tissues, and was induced by Pi starvation. Localized in endoplasmic reticulum (ER), and mutation of PHF1 resulted in ER retention and reduced accumulation of the plasma membrane PHT1;1 transporter.	PHF1	phosphate transporter traffic facilitator1(PHF1)
CpG	561	chr1	5516936	5517412	477	12	-0.625722	-5.25164	0.000570322	0.0282843	Hypomethylated	-20	No	No	No	Yes	Promoter	AT1G16090	677	WAKL7	WAK-like kinase	WAKL7	wall associated kinase-like 7(WAKL7)
CpG	598	chr3	3989391	3990480	1090	29	-0.623354	-5.43948	0.000672043	0.0469444	Hypomethylated	-20	No	No	No	Yes	Promoter	AT3G12570	801	FYD		FYD	FYD(FYD)
CpG	639	chr1	17770668	17771517	850	17	-0.642248	-5.09524	0.000840475	0.0360859	Hypomethylated	-20	No	No	Yes	Yes	Promoter	AT1G48110	1976	ECT7		ECT7	evolutionarily conserved C-terminal region 7(ECT7)
CpG	669	chr5	5499907	5500961	1055	37	-0.631027	-5.16787	0.000960433	0.0457229	Hypomethylated	-20	No	Yes	No	No	Promoter	AT5G16730	2383	MAC		AT5G16730	weak chloroplast movement under blue light protein (DUF827)(AT5G16730)
CpG	673	chr1	3992350	3992578	229	10	-0.617914	-5.03924	0.000975551	0.0395968	Hypomethylated	-20	No	No	No	Yes	Promoter	AT1G11820	1129	PdBG4		AT1G11820	O-Glycosyl hydrolases family 17 protein(AT1G11820)
CpG	683	chr1	11640886	11641372	487	25	-0.618031	-5.00737	0.00102058	0.0401842	Hypomethylated	-20	No	Yes	No	No	Promoter	AT1G32260	517			AT1G32260	envelope glycoprotein(AT1G32260)
CpG	700	chr1	28191523	28192043	521	12	-0.620522	-4.96655	0.00114064	0.0430014	Hypomethylated	-20	No	Yes	No	No	Promoter	AT1G75100	2025	AUXILIN-LIKE6	Contains a J-domain at the C-terminus which is similar to the J-domain of auxilin, a clathrin-uncoating factor in cow, yeast and worm. Arabidopsis contains 6 other proteins similar to auxilin. Expressed in leaves and stems, but not in roots. Localized in the cytoplasm. Required for the chloroplast accumulation response, but not for the avoidance response. No molecular function known.	JAC1	J-domain protein required for chloroplast accumulation response 1(JAC1)
CpG	706	chr4	788507	789207	701	25	-0.637059	-5.06329	0.00118762	0.035229	Hypomethylated	-20	No	No	Yes	No	Promoter	AT4G01830	258	ABCB5		ABCB5	P-glycoprotein 5(ABCB5)
CpG	321	chr4	12584748	12586059	1312	25	0.620883	5.93639	0.000215931	0.0144032	Hypermethylated	20	No	No	No	Yes	Promoter	AT4G24270	1325	EMB140	A locus involved in embryogenesis. Mutations in this locus result in embryo lethality.	EMB140	EMBRYO DEFECTIVE 140(EMB140)
CpG	435	chr1	23584001	23584799	799	19	0.623319	5.51747	0.000345195	0.0207879	Hypermethylated	20	No	No	No	Yes	Promoter	AT1G63610	985	DUF760-3		AT1G63610	uncharacterized protein(AT1G63610)
CpG	467	chr1	20590922	20591504	583	15	0.627313	5.42763	0.00039022	0.0224777	Hypermethylated	20	No	No	No	Yes	Promoter	AT1G55200	838			AT1G55200	kinase with adenine nucleotide alpha hydrolases-like domain-containing protein(AT1G55200)
CpG	507	chr4	7288613	7289298	686	20	0.612824	5.39134	0.000496642	0.0202933	Hypermethylated	20	No	Yes	No	No	Promoter	AT4G12240	810			AT4G12240	zinc finger (C2H2 type) family protein(AT4G12240)
CpG	570	chr4	18287499	18288064	566	11	0.625638	5.32963	0.000583015	0.0220687	Hypermethylated	20	No	No	No	Yes	Promoter	AT4G39300	792			AT4G39300	envelope glycoprotein(AT4G39300)
CpG	691	chr1	6950009	6950590	582	14	0.631416	4.99361	0.00105059	0.0405967	Hypermethylated	20	No	No	Yes	Yes	Promoter	AT1G20050	966	HYD1	C-8 sterol isomerase	HYD1	C-8,7 sterol isomerase(HYD1)
CpG	726	chr1	814675	815760	1086	17	0.636174	4.8881	0.00135076	0.0470939	Hypermethylated	20	No	No	No	Yes	Promoter	AT1G03310	1262	AtBE2	Encodes a protein with strong similarity to isoamylase (EC:3.2.1.68) however lacks critical residues known to be important for activity. Appears to co localize with ISA1 in the chloroplast isoamylase complex. Mutations in this gene cause the loss of detectable isoamylase activity and the disruption of normal starch structure. It has been postulated that AtISA2 interacts with AtISA1 to form the Is…	DBE1	debranching enzyme 1(DBE1)
CpG	92	chr2	17498843	17499782	940	32	0.670326	10.7722	2.02901e-05	0.00781648	Hypermethylated	21	No	No	No	Yes	Promoter	AT2G41920	0			AT2G41920	Protein kinase superfamily protein(AT2G41920)
CpG	314	chr1	26188387	26188782	396	11	0.658938	5.98022	0.00019511	0.0181058	Hypermethylated	21	No	No	No	Yes	Promoter	AT1G69610	1674			AT1G69610	zinc finger FYVE domain protein, putative (DUF1666)(AT1G69610)
CpG	353	chr1	9717208	9717893	686	16	0.660718	5.7119	0.000240136	0.0181058	Hypermethylated	21	No	No	No	Yes	Promoter	AT1G27900	2697			AT1G27900	RNA helicase family protein(AT1G27900)
CpG	376	chr4	10262499	10263003	505	18	0.674184	5.81536	0.000259118	0.0144032	Hypermethylated	21	No	Yes	No	No	Promoter	AT4G18640	2899	MDIS2	Required for root hair elongation during tip growth.	MRH1	Leucine-rich repeat protein kinase family protein(MRH1)
CpG	377	chr4	941802	942812	1011	23	0.655766	5.87651	0.000259118	0.0144032	Hypermethylated	21	No	No	Yes	Yes	Promoter	AT4G02120	1081	CTPS3		AT4G02120	CTP synthase family protein(AT4G02120)
CpG	395	chr1	28757881	28758583	703	13	0.671584	5.59064	0.00030017	0.0201584	Hypermethylated	21	No	No	No	Yes	Promoter	AT1G76620	1360	PDE339		AT1G76620	Serine/Threonine-kinase, putative (Protein of unknown function, DUF547)(AT1G76620)
CpG	411	chr1	12923667	12924366	700	17	0.667432	5.55481	0.000315178	0.0201584	Hypermethylated	21	No	No	No	Yes	Promoter	AT1G06837	662
CpG	412	chr1	8200422	8201131	710	18	0.662122	5.56412	0.000315178	0.0201584	Hypermethylated	21	No	No	No	Yes	Promoter	AT1G23130	101			AT1G23130	Polyketide cyclase/dehydrase and lipid transport superfamily protein(AT1G23130)
CpG	530	chr3	5983292	5983789	498	16	0.672125	5.59023	0.00053056	0.0406509	Hypermethylated	21	No	No	Yes	No	Promoter	AT3G17480	96			AT3G17480	F-box/associated interaction domain protein(AT3G17480)
CpG	591	chr1	20499109	20499848	740	11	0.649809	5.20859	0.000630356	0.0296747	Hypermethylated	21	No	No	No	Yes	Promoter	AT1G54960	0	ANP2	Member of MEKK subfamily	NP2	NPK1-related protein kinase 2(NP2)
CpG	594	chr1	24395377	24396036	660	11	0.666727	5.1909	0.000660373	0.0304692	Hypermethylated	21	No	Yes	No	No	Promoter	AT1G65610	0	ATGH9A2		KOR2	Six-hairpin glycosidases superfamily protein(KOR2)
CpG	668	chr5	17051210	17051832	623	10	0.654613	5.16805	0.000960433	0.0457229	Hypermethylated	21	No	No	No	Yes	Promoter	AT5G06325	-1111
CpG	159	chr5	9615443	9615983	541	18	0.70571	6.74256	4.72344e-05	0.00734833	Hypermethylated	22	No	No	No	Yes	Promoter	AT5G27280	-1457			AT5G27280	Zim17-type zinc finger protein(AT5G27280)
CpG	296	chr2	10761203	10762844	1642	38	0.688825	6.64813	0.000182611	0.0282724	Hypermethylated	22	No	No	Yes	Yes	Promoter	AT2G08130	0
CpG	313	chr1	26718711	26719033	323	10	0.691434	5.98532	0.00019511	0.0181058	Hypermethylated	22	No	No	No	Yes	Promoter	AT1G70860	0			AT1G70860	Polyketide cyclase/dehydrase and lipid transport superfamily protein(AT1G70860)
CpG	351	chr1	22524171	22525192	1022	15	0.703454	5.76798	0.000240136	0.0181058	Hypermethylated	22	No	No	No	Yes	Promoter	AT1G61120	536	GES	Encodes a geranyllinalool synthase that produces a precursor to TMTT, a volatile plant defense C16-homoterpene. GES transcript levels rise in response to alamethicin, a fungal peptide mixture that damages membranes. This transcriptional response is blocked in JA biosynthetic and JA signaling mutants, but GES transcript levels still rise in response to alamethicin in mutants with salicylic acid an…	TPS04	terpene synthase 04(TPS04)
CpG	369	chr1	10210730	10211368	639	13	0.693537	5.62782	0.000255144	0.0187794	Hypermethylated	22	No	No	No	Yes	Promoter	AT1G29220	1354			AT1G29220	transcriptional regulator family protein(AT1G29220)
CpG	391	chr3	16759480	16760221	742	20	0.705082	6.04627	0.000282965	0.0301205	Hypermethylated	22	No	No	No	Yes	Promoter	AT3G45650	603	AtNPF2.7	Encodes a nitrate efflux transporter NAXT1 (for NITRATE EXCRETION TRANSPORTER1). Localized to the plasma membrane. NAXT1 belongs to a subclass of seven NAXT members from the large NITRATE TRANSPORTER1/PEPTIDE TRANSPORTER family and is mainly expressed in the cortex of mature roots.	NAXT1	nitrate excretion transporter1(NAXT1)
CpG	520	chr5	23265538	23266288	751	19	0.700716	5.55006	0.000519579	0.0328432	Hypermethylated	22	No	No	No	Yes	Promoter	AT5G57410	1595			AT5G57410	Afadin/alpha-actinin-binding protein(AT5G57410)
CpG	564	chr5	9280973	9281564	592	13	0.684158	5.41264	0.000582558	0.0331715	Hypermethylated	22	No	No	No	Yes	Promoter	AT5G26692	-915		Encodes a Plant thionin family protein	AT5G26692	Putative membrane lipoprotein(AT5G26692)
CpG	610	chr3	9706810	9707705	896	11	0.694197	5.40726	0.000725099	0.0481697	Hypermethylated	22	No	Yes	Yes	No	Promoter	AT3G05025	0
CpG	632	chr4	11779852	11780882	1031	12	0.690528	5.23532	0.000798946	0.0280085	Hypermethylated	22	No	No	No	Yes	Promoter	AT4G22285	1813			AT4G22285	Ubiquitin C-terminal hydrolases superfamily protein(AT4G22285)
CpG	638	chr5	14620052	14620880	829	15	0.697068	5.23128	0.000834475	0.0425143	Hypermethylated	22	No	No	No	Yes	Promoter	AT5G37000	2175			AT5G37000	glycosyltransferase family exostosin protein(AT5G37000)
CpG	714	chr1	12020275	12021645	1371	17	0.695782	4.93305	0.0012457	0.044952	Hypermethylated	22	No	Yes	Yes	No	Promoter	AT1G33140	-1580	PGY2	Encodes ribosomal protein L9. Identified in a screen for enhancers of as1. as1/pgy double mutants show defects in leaf vascular patterning and adaxial cell fate. Double mutant analysis indicates pgy genes function in the same pathway as REV, KAN1 and KAN2.	PGY2	Ribosomal protein L6 family(PGY2)
CpG	737	chr4	6229417	6229964	548	11	0.688452	4.99051	0.00153311	0.0424706	Hypermethylated	22	No	No	No	Yes	Promoter	AT4G09930	861	IAN11		AT4G09930	Avirulence induced gene (AIG1) family protein(AT4G09930)
CpG	749	chr4	12691278	12691937	660	11	0.690009	4.87281	0.0019002	0.0492614	Hypermethylated	22	No	No	Yes	Yes	Promoter	AT4G24580	2491	REN1	Encodes a Rho GTPase-activating protein that interacts with ROP1 (a Rho GTPase) and regulates pollen tube development. This protein can be observed at the apical tip of growing pollen tubes and on endocytic vesicles traveling to this region of the pollen tube.	REN1	Rho GTPase activation protein (RhoGAP) with PH domain-containing protein(REN1)
CpG	350	chr1	13055419	13055756	338	10	0.737825	5.74545	0.000240136	0.0181058	Hypermethylated	23	No	No	No	Yes	Promoter	AT1G35480	608			AT1G35480	pseudo(AT1G35480)
CpG	486	chr2	1857992	1860114	2123	37	0.725262	6.09552	0.000446383	0.0406023	Hypermethylated	23	No	No	No	Yes	Promoter	AT2G05160	1820	AtC3H18		AT2G05160	CCCH-type zinc fingerfamily protein with RNA-binding domain-containing protein(AT2G05160)
CpG	490	chr1	20999048	20999672	625	15	0.713486	5.39234	0.000450254	0.0256175	Hypermethylated	23	No	No	No	Yes	Promoter	AT1G56130	966	IGP2		AT1G56130	Leucine-rich repeat transmembrane protein kinase(AT1G56130)
CpG	707	chr1	19130195	19130832	638	13	0.734094	4.95322	0.00120068	0.0447392	Hypermethylated	23	No	No	No	Yes	Promoter	AT1G51590	1486	MANIB	Encodes an alpha-mannosidase I enzyme responsible for N-glycan maturation.	MNS1	alpha-mannosidase 1(MNS1)
CpG	716	chr1	21733660	21734430	771	11	0.719053	4.92621	0.00126071	0.0451566	Hypermethylated	23	No	No	No	Yes	Promoter	AT1G58520	1094	OSCA2.1		RXW8	GDSL-like lipase/acylhydrolase superfamily protein(RXW8)
CpG	741	chr4	12716631	12717076	446	14	0.716713	4.95537	0.0015763	0.0424706	Hypermethylated	23	No	Yes	Yes	No	Promoter	AT4G24630	2007			AT4G24630	DHHC-type zinc finger family protein(AT4G24630)
CpG	329	chr1	25370236	25371458	1223	16	0.750954	5.88468	0.000225127	0.0181058	Hypermethylated	24	No	No	No	Yes	Promoter	AT1G67690	1362	PSPM3		AT1G67690	Zincin-like metalloproteases family protein(AT1G67690)
CpG	366	chr5	8614886	8615774	889	11	0.767393	5.87907	0.000251917	0.0207047	Hypermethylated	24	No	Yes	No	No	Promoter	AT5G25010	-4			AT5G25010	enhanced disease resistance-like protein (DUF1336)(AT5G25010)
CpG	493	chr3	23414310	23415047	738	19	0.768369	5.64673	0.000459819	0.0384732	Hypermethylated	24	No	Yes	Yes	No	Promoter	AT3G63400	2286			AT3G63400	Cyclophilin-like peptidyl-prolyl cis-trans isomerase family protein(AT3G63400)
CpG	563	chr5	16665699	16666148	450	13	0.739583	5.39614	0.000582558	0.0331715	Hypermethylated	24	No	Yes	No	No	Promoter	AT5G41670	1023	PGD3		AT5G41670	6-phosphogluconate dehydrogenase family protein(AT5G41670)
CpG	718	chr1	29013874	29014750	877	11	0.751271	4.9166	0.00127572	0.0451566	Hypermethylated	24	No	No	Yes	Yes	Promoter	AT1G77220	1200	LAZ1H1		AT1G77220	organic solute transporter ostalpha protein (DUF300)(AT1G77220)
CpG	740	chr4	17685032	17685371	340	12	0.754396	4.97657	0.0015763	0.0424706	Hypermethylated	24	No	No	No	Yes	Promoter	AT4G37640	1734	ACA2	Encodes a calmodulin-regulated Ca(2+)-pump located in the endoplasmic reticulum. Belongs to plant 2B ATPase&apos;s with an N-terminal autoinhibitor.	ACA2	calcium ATPase 2(ACA2)
CpG	271	chr5	16807999	16808727	729	21	0.795744	5.97125	0.000173193	0.0150886	Hypermethylated	25	No	No	No	Yes	Promoter	AT5G42020	1966	BIP	Luminal binding protein (BiP2) involved in polar nuclei fusion during proliferation of endosperm nuclei.	BIP2	Heat shock protein 70 (Hsp 70) family protein(BIP2)
CpG	317	chr2	7885184	7885542	359	11	0.794187	6.54482	0.000202901	0.0282724	Hypermethylated	25	No	No	No	Yes	Promoter	AT2G18130	-1249	ATPAP11		PAP11	purple acid phosphatase 11(PAP11)
CpG	384	chr3	2649566	2650177	612	13	0.794157	6.12224	0.00026528	0.0301205	Hypermethylated	25	No	No	No	Yes	Promoter	AT3G08720	1054	ATPK19	Encodes a ribosomal-protein S6 kinase. Gene expression is induced by cold and salt (NaCl). Activation of AtS6k is regulated by 1-naphthylacetic acid and kinetin, at least in part, via a lipid kinase-dependent pathway. Phosphorylates specifically mammalian and plant S6 at 25 degrees C but not at 37 degrees C. Involved in translational up-regulation of ribosomal proteins.	S6K2	serine/threonine protein kinase 2(S6K2)
CpG	390	chr3	15170498	15171197	700	22	0.773939	6.04765	0.000282965	0.0301205	Hypermethylated	25	No	No	Yes	No	Promoter	AT3G06555	0
CpG	408	chr1	23607752	23608320	569	20	0.78196	5.57112	0.000315178	0.0201584	Hypermethylated	25	No	Yes	No	No	Promoter	AT1G63670	2457	TRM12		TRM12	hypothetical protein (DUF3741)(TRM12)
CpG	448	chr2	7333751	7334903	1153	27	0.781969	6.19608	0.000365223	0.0405397	Hypermethylated	25	No	No	No	Yes	Promoter	AT2G06795	0
CpG	614	chr5	9143876	9144351	476	12	0.799232	5.26978	0.000740006	0.0383746	Hypermethylated	25	No	No	No	Yes	Promoter	AT5G26160	1011	PMIR2		AT5G26160	light-independent protochlorophyllide reductase subunit(AT5G26160)
CpG	626	chr3	19002863	19003602	740	16	0.78095	5.34724	0.000778155	0.0481697	Hypermethylated	25	No	No	No	Yes	Promoter	AT3G51150	2186			AT3G51150	ATP binding microtubule motor family protein(AT3G51150)
CpG	731	chr1	18904384	18904848	465	11	0.780133	4.86773	0.00144081	0.0493067	Hypermethylated	25	No	No	No	Yes	Promoter	AT1G50990	1706	BSK11		BSK11	kinase with tetratricopeptide repeat domain-containing protein(BSK11)
CpG	131	chr4	14490096	14491138	1043	22	0.810524	6.88282	4.31863e-05	0.00484472	Hypermethylated	26	No	No	No	Yes	Promoter	AT4G29490	2213			AT4G29490	Metallopeptidase M24 family protein(AT4G29490)
CpG	167	chr1	7446417	7446967	551	14	0.817073	6.69263	6.00339e-05	0.00927924	Hypermethylated	26	No	No	No	Yes	Promoter	AT1G21270	1668	WAK2	Cytoplasmic serine/threonine protein kinase induced by salicylic acid. mutant plants exhibit a loss of cell expansion and dependence on sugars and salts for seedling growth, affecting the expression and activity of vacuolar invertase.	WAK2	wall-associated kinase 2(WAK2)
CpG	206	chr3	13331136	13332882	1747	16	0.802743	7.37031	7.07414e-05	0.016832	Hypermethylated	26	No	No	No	Yes	Promoter	AT3G32389	-886			AT3G32389	pseudo(AT3G32389)
CpG	233	chr3	7902016	7902809	794	24	0.82361	7.18833	8.84267e-05	0.0187022	Hypermethylated	26	No	No	No	Yes	Promoter	AT3G22350	111			AT3G22350	F-box and associated interaction domains-containing protein(AT3G22350)
CpG	303	chr4	8077269	8077843	575	14	0.824071	6.05073	0.000194338	0.0141067	Hypermethylated	26	No	No	No	Yes	Promoter	AT4G13980	1565	AT-HSFA5	Member of Heat Stress Transcription Factor (Hsf) family	AT-HSFA5	winged-helix DNA-binding transcription factor family protein(AT-HSFA5)
CpG	339	chr5	5119433	5120514	1082	16	0.815754	5.90496	0.000236172	0.019784	Hypermethylated	26	No	No	No	Yes	Promoter	AT5G15700	1327		Nucleus encoded plastid RNA polymerase. Localized in mitochondria and chloroplast.	AT5G15700	DNA/RNA polymerases superfamily protein(AT5G15700)
CpG	534	chr5	15435557	15436227	671	16	0.803793	5.51671	0.000535323	0.0328432	Hypermethylated	26	No	No	No	Yes	Promoter	AT5G38550	0			AT5G38550	Mannose-binding lectin superfamily protein(AT5G38550)
CpG	649	chr1	21090371	21091185	815	14	0.821763	5.06254	0.0008855	0.0369916	Hypermethylated	26	No	No	No	Yes	Promoter	AT1G56340	1524	AtCRT1a	Encodes one of three Arabidopsis calreticulins. In CRT-deficient mouse fibroblasts, this protein restores ER Ca2+ levels.	CRT1a	calreticulin 1a(CRT1a)
CpG	736	chr4	12596433	12596974	542	14	0.82592	4.99243	0.00153311	0.0424706	Hypermethylated	26	No	No	No	Yes	Promoter	AT4G24290	2388	MACP2		AT4G24290	MAC/Perforin domain-containing protein(AT4G24290)
CpG	165	chr1	11041077	11042402	1326	20	0.846305	6.93015	6.00339e-05	0.00927924	Hypermethylated	27	No	No	No	Yes	Promoter	AT1G30970	1349	SUF4	Encodes SUF4 (SUPPRESSOR of FRI 4), a putative zinc-finger-containing transcription factor that is required for delayed flowering in winter-annual Arabidopsis. suf4 mutations strongly suppress the late-flowering phenotype of FRI (FRIGIDA) mutants. suf4 mutants also show reduced H3K4 trimethylation at FLC (FLOWERING LOCUS C), a floral inhibitor. SUF4 may act to specifically recruit a putative hist…	SUF4	zinc finger (C2H2 type) family protein(SUF4)
CpG	188	chr4	10083399	10084215	817	19	0.838614	6.57658	6.47794e-05	0.00562942	Hypermethylated	27	No	No	No	Yes	Promoter	AT4G18240	1291	ATSS4		SS4	starch synthase 4(SS4)
CpG	224	chr5	15141230	15141781	552	11	0.833952	6.25374	7.8724e-05	0.00879287	Hypermethylated	27	No	No	No	Yes	Promoter	AT5G38000	0			AT5G38000	Zinc-binding dehydrogenase family protein(AT5G38000)
CpG	308	chr1	11140016	11140650	635	10	0.8462	6.09773	0.00019511	0.0181058	Hypermethylated	27	Yes	Yes	No	No	Promoter	AT1G06417	0
CpG	407	chr1	10016825	10017493	669	14	0.839415	5.56578	0.000315178	0.0201584	Hypermethylated	27	No	No	No	Yes	Promoter	AT1G28490	969	ATSYP61	Encodes one of 24 Arabidopsis syntaxins. Its mRNA has been shown to be expressed.	SYP61	syntaxin of plants 61(SYP61)
CpG	523	chr1	26760703	26761001	299	10	0.855476	5.34342	0.000525297	0.0282843	Hypermethylated	27	No	No	No	Yes	Promoter	AT1G70970	869			AT1G70970	F-box and associated interaction domains-containing protein(AT1G70970)
CpG	606	chr5	10318463	10319164	702	26	0.844736	5.30192	0.000708516	0.0376378	Hypermethylated	27	Yes	Yes	No	No	Promoter	AT5G28345	696
CpG	91	chr2	9056509	9057262	754	12	0.875431	8.82522	2.02901e-05	0.00781648	Hypermethylated	28	No	Yes	No	No	Promoter	AT2G21130	-28			AT2G21130	Cyclophilin-like peptidyl-prolyl cis-trans isomerase family protein(AT2G21130)
CpG	187	chr4	5973250	5973742	493	11	0.894754	6.51889	6.47794e-05	0.00562942	Hypermethylated	28	No	No	No	Yes	Promoter	AT4G09432	1453			AT4G09432	ncRNA(AT4G09432)
CpG	259	chr4	9767159	9767619	461	11	0.879217	6.11302	0.000129559	0.00963106	Hypermethylated	28	No	No	No	Yes	Promoter	AT4G17510	1212	UCH3		UCH3	ubiquitin C-terminal hydrolase 3(UCH3)
CpG	316	chr2	9850361	9851240	880	11	0.879357	6.53221	0.000202901	0.0282724	Hypermethylated	28	No	No	No	Yes	Promoter	AT2G07885	325
CpG	550	chr3	16474546	16474964	419	10	0.873829	5.54275	0.000565931	0.0406509	Hypermethylated	28	No	No	Yes	Yes	Promoter	AT3G45040	818	AtDOK1	Encodes a putative dolichol kinase.	AT3G45040	phosphatidate cytidylyltransferase family protein(AT3G45040)
CpG	581	chr2	8417052	8417787	736	11	0.892761	5.62867	0.000608704	0.0463536	Hypermethylated	28	No	No	No	Yes	Promoter	AT2G19430	2006	AtTHO6	This gene is predicted to encode a protein with a DWD motif. It can bind to DDB1a in Y2H assays, and DDB1b in co-IP assays, and may be involved in the formation of a CUL4-based E3 ubiquitin ligase. Encodes a component of the putative Arabidopsis THO/TREX complex: THO1 or HPR1 (At5g09860), THO2 (At1g24706), THO3 or TEX1 (At5g56130), THO5 (At5g42920, At1g45233), THO6 (At2g19430), and THO7 (At5g1679…	DWA1	DWD (DDB1-binding WD40 protein) hypersensitive to ABA 1(DWA1)
CpG	600	chr5	4503920	4504644	725	10	0.877002	5.32917	0.000677027	0.037096	Hypermethylated	28	No	No	No	Yes	Promoter	AT5G13960	2558	KYP	Encodes a histone 3 lysine 9 specific methyltransferase involved in the maintenance of DNA methylation. SUVH4/KYP is a SU(VAR)3-9 homolog, a SET domain protein. Known SET domain proteins are involved in epigenetic control of gene expression. There are 10 SUVH genes in Arabidopsis and members of this subfamily of the SET proteins have an additional conserved SRA domain. In kyp mutants, there is a …	SUVH4	histone-lysine N-methyltransferase, H3 lysine-9 specific SUVH4-like protein(SUVH4)
CpG	665	chr4	8982933	8983740	808	15	0.880765	5.16313	0.000950098	0.0310164	Hypermethylated	28	No	Yes	Yes	No	Promoter	AT4G15790	750			AT4G15790	uveal autoantigen with coiled-coil/ankyrin(AT4G15790)
CpG	688	chr4	2441801	2442204	404	12	0.866982	5.1252	0.00103647	0.0321358	Hypermethylated	28	No	No	No	Yes	Promoter	AT4G04810	560	ATMSRB4		MSRB4	methionine sulfoxide reductase B4(MSRB4)
CpG	697	chr4	17827133	17827577	445	15	0.895184	5.08885	0.00112284	0.0344674	Hypermethylated	28	No	No	No	Yes	Promoter	AT4G37910	615	HSP70-9		mtHsc70-1	mitochondrial heat shock protein 70-1(mtHsc70-1)
CpG	160	chr3	17725565	17726875	1311	25	0.923089	8.38294	5.3056e-05	0.016832	Hypermethylated	29	No	Yes	No	No	Promoter	AT3G48030	1079	AtHIGD1		AT3G48030	hypoxia-responsive family protein / zinc finger (C3HC4-type RING finger) family protein(AT3G48030)
CpG	205	chr3	9718861	9719569	709	16	0.911408	7.3886	7.07414e-05	0.016832	Hypermethylated	29	No	No	No	Yes	Promoter	AT3G05045	0
CpG	327	chr1	21126857	21128049	1193	11	0.900103	5.84457	0.000225127	0.0181058	Hypermethylated	29	No	Yes	No	No	Promoter	AT1G56423	-863			AT1G56423	uncharacterized protein(AT1G56423)
CpG	558	chr1	4506619	4507339	721	12	0.89633	5.27602	0.000570322	0.0282843	Hypermethylated	29	No	No	No	Yes	Promoter	AT1G13200	1189			AT1G13200	F-box and associated interaction domains-containing protein(AT1G13200)
CpG	603	chr1	17926311	17926978	668	27	0.915367	5.16876	0.00069039	0.0315403	Hypermethylated	29	No	No	No	Yes	Promoter	AT1G48490	1976	IRE3		AT1G48490	Protein kinase superfamily protein(AT1G48490)
CpG	304	chr3	6620902	6621672	771	11	0.933066	6.46352	0.000194539	0.0279475	Hypermethylated	30	No	No	No	Yes	Promoter	AT3G19160	1606	ATIPT8	Encodes cytokinin synthase.	IPT8	ATP/ADP isopentenyltransferase(IPT8)
CpG	465	chr3	2724011	2725055	1045	14	0.939953	5.6855	0.000389078	0.032916	Hypermethylated	30	No	No	No	Yes	Promoter	AT3G08947	858			AT3G08947	ARM repeat superfamily protein(AT3G08947)
CpG	43	chr5	13882909	13883936	1028	12	0.975059	7.49567	1.57448e-05	0.00279936	Hypermethylated	31	No	No	No	Yes	Promoter	AT5G35715	1687	CYP71B8	Encodes a protein with cytochrome P450 domain	CYP71B8	cytochrome P450, family 71, subfamily B, polypeptide 8(CYP71B8)
CpG	44	chr5	19872402	19873288	887	22	0.962361	8.64489	1.57448e-05	0.00279936	Hypermethylated	31	No	No	No	Yes	Promoter	AT5G49020	1211	ATPRMT4A	Encodes a type I protein arginine methyltransferase. PRMT4a can catalyze the asymmetric dimethylation of arginines 2,17, and 26 on histone 3 and can also methylate myelin basic protein in vitro. Double mutants lacking PRMT4a and 4b have reduced levels of histone 3 methylated at R17. These double mutants flower late due to defects in the autonomous pathway and they have elevated levels of FLC tran…	PRMT4A	protein arginine methyltransferase 4A(PRMT4A)
CpG	156	chr5	7954429	7954921	493	15	0.961655	6.80571	4.72344e-05	0.00734833	Hypermethylated	31	No	No	No	Yes	Promoter	AT5G23590	701			AT5G23590	DNAJ heat shock N-terminal domain-containing protein(AT5G23590)
CpG	278	chr3	17571840	17572227	388	11	0.98201	6.66424	0.000176853	0.0269312	Hypermethylated	31	No	No	No	Yes	Promoter	AT3G47660	0	PRAF2		AT3G47660	Regulator of chromosome condensation (RCC1) family protein(AT3G47660)
CpG	291	chr2	9735066	9735820	755	10	0.975208	7.25261	0.000182611	0.0282724	Hypermethylated	31	No	No	No	Yes	Promoter	AT2G22850	-1454	AtbZIP6		bZIP6	basic leucine-zipper 6(bZIP6)
CpG	326	chr1	7876692	7877567	876	12	0.96448	5.80228	0.000225127	0.0181058	Hypermethylated	31	No	No	No	Yes	Promoter	AT1G22290	395			AT1G22290	14-3-3 family protein(AT1G22290)
CpG	340	chr4	12165115	12165294	180	10	0.969815	5.87987	0.000237525	0.0144032	Hypermethylated	31	No	No	No	Yes	Promoter	AT4G23250	1732	CRK17		EMB1290	cysteine-rich receptor-like protein kinase 17(EMB1290)
CpG	519	chr4	887264	887910	647	12	0.980649	5.36879	0.000518235	0.0208988	Hypermethylated	31	No	No	No	Yes	Promoter	AT4G02020	684	EZA1	Encodes a polycomb group protein. Forms part of a large protein complex that can include VRN2 (VERNALIZATION 2), VIN3 (VERNALIZATION INSENSITIVE 3) and polycomb group proteins FERTILIZATION INDEPENDENT ENDOSPERM (FIE) and CURLY LEAF (CLF). The complex has a role in establishing FLC (FLOWERING LOCUS C) repression during vernalization. Performs a partially redundant role to MEA in controlling seed …	SWN	SET domain-containing protein(SWN)
CpG	572	chr1	4502158	4502653	496	13	0.970585	5.24222	0.000585331	0.0285703	Hypermethylated	31	No	No	No	Yes	Promoter	AT1G13195	890			AT1G13195	RING/U-box superfamily protein(AT1G13195)
CpG	702	chr4	15143990	15144437	448	12	0.977586	5.07689	0.00116603	0.0350946	Hypermethylated	31	No	No	No	Yes	Promoter	AT4G31150	1203			AT4G31150	endonuclease V family protein(AT4G31150)
CpG	734	chr4	343930	344511	582	12	0.961381	5.00861	0.00146833	0.0415579	Hypermethylated	31	No	No	No	Yes	Promoter	AT4G00800	1274	SETH5		SETH5	transducin family protein / WD-40 repeat family protein(SETH5)
CpG	219	chr5	17497930	17498452	523	12	1.01244	6.25432	7.8724e-05	0.00879287	Hypermethylated	32	No	Yes	No	No	Promoter	AT5G43550	38			AT5G43550	F-box associated ubiquitination effector family protein(AT5G43550)
CpG	347	chr1	26022749	26023303	555	10	1.01533	5.76221	0.000240136	0.0181058	Hypermethylated	32	No	No	No	Yes	Promoter	AT1G69220	2868	SIK1	Encodes a putative serine/threonine kinase (SIK1).	SIK1	Protein kinase superfamily protein(SIK1)
CpG	458	chr1	12060317	12060757	441	11	0.990921	5.4396	0.000375212	0.021885	Hypermethylated	32	No	Yes	No	No	Promoter	AT1G33250	-525			AT1G33250	beta-1,3-n-acetylglucosaminyltransferase radical fringe protein, putative (DUF604)(AT1G33250)
CpG	612	chr1	2764378	2765149	772	16	0.99745	5.1554	0.000735416	0.0332695	Hypermethylated	32	No	No	No	Yes	Promoter	AT1G08680	1794	AGD14	A member of ARF GAP domain (AGD), A thaliana has 15 members, grouped into four classes. AGD14 belongs to the class 4, together with AGD15.	ZIGA4	ARF GAP-like zinc finger-containing protein ZIGA4(ZIGA4)
CpG	748	chr4	7551581	7551971	391	13	1.01458	4.90374	0.00185701	0.0485498	Hypermethylated	32	No	No	No	Yes	Promoter	AT4G12910	1404	scpl20		scpl20	serine carboxypeptidase-like 20(scpl20)
CpG	212	chr1	21416286	21416727	442	10	1.05173	6.49466	7.50424e-05	0.0103872	Hypermethylated	33	No	Yes	No	No	Promoter	AT1G57820	1388	ORTH2	Encodes a 645-amino acid methylcytosine-binding protein with a PHD domain, two RING finger domains, and an SRA domain that is involved in centromere heterochromatinization. This protein functions as an E3 ubiquitin ligase in vitro. The protein has been shown to bind to methylated cytosines of CG, CNG and CNN motifs via its SRA domain but has a preference for the former. It plays a role in the est…	VIM1	Zinc finger (C3HC4-type RING finger) family protein(VIM1)
CpG	580	chr2	17912481	17912999	519	11	1.03996	5.62796	0.000608704	0.0463536	Hypermethylated	33	No	No	No	Yes	Promoter	AT2G43070	1891	ATSPPL3		SPPL3	SIGNAL PEPTIDE PEPTIDASE-LIKE 3(SPPL3)
CpG	267	chr5	3627971	3628723	753	27	1.06805	6.09248	0.000141703	0.013871	Hypermethylated	34	No	No	No	Yes	Promoter	AT5G11370	122			AT5G11370	FBD / Leucine Rich Repeat domains containing protein(AT5G11370)
CpG	393	chr1	19171525	19172088	564	12	1.07108	5.59784	0.000285161	0.0201584	Hypermethylated	34	No	No	Yes	No	Promoter	AT1G07763	0
CpG	402	chr4	15112173	15112680	508	10	1.06179	5.70664	0.000302304	0.015942	Hypermethylated	34	No	No	Yes	No	Promoter	AT4G31040	1446	DLDG1		AT4G31040	CemA-like proton extrusion protein-like protein(AT4G31040)
CpG	18	chr1	19420268	19420494	227	10	1.09262	8.21839	1.50085e-05	0.00497102	Hypermethylated	35	No	No	No	Yes	Promoter	AT1G52155	2834			AT1G52155	uncharacterized protein(AT1G52155)
CpG	37	chr5	17670835	17671278	444	12	1.1222	12.509	1.57448e-05	0.00279936	Hypermethylated	36	No	No	No	Yes	Promoter	AT5G43910	-543			AT5G43910	pfkB-like carbohydrate kinase family protein(AT5G43910)
CpG	102	chr4	5437651	5438616	966	13	1.15129	9.26956	2.15931e-05	0.00484472	Hypermethylated	37	No	No	No	Yes	Promoter	AT4G08545	1051
CpG	161	chr1	12548822	12549713	892	10	1.16299	6.78927	6.00339e-05	0.00927924	Hypermethylated	37	No	No	No	Yes	Promoter	AT1G34370	-626	AtSTOP1	Encodes a putative nuclear Cys(2)His(2)-type zinc finger protein involved in H+ and Al3+ rhizotoxicity. In mutants exposed to aluminum stress, there is no induction of AtALMT1, an malate transporter known to be involved in the mediation of aluminum toxicity.	STOP1	C2H2 and C2HC zinc fingers superfamily protein(STOP1)
CpG	200	chr3	11100068	11100774	707	10	1.16888	7.75603	7.07414e-05	0.016832	Hypermethylated	37	No	No	No	Yes	Promoter	AT3G29130	2735			AT3G29130	kxDL motif protein(AT3G29130)
CpG	218	chr5	20057371	20057890	520	11	1.17703	6.3667	7.8724e-05	0.00879287	Hypermethylated	37	No	No	No	Yes	Promoter	AT5G49460	2870	ACLB-2	One of the two genes encoding subunit B of the cytosolic enzyme ATP Citrate Lyase (ACL)	ACLB-2	ATP citrate lyase subunit B 2(ACLB-2)
CpG	364	chr3	11097266	11098031	766	20	1.15039	6.19696	0.000247595	0.0301205	Hypermethylated	37	No	No	No	Yes	Promoter	AT3G29120	-474			AT3G29120	pseudo(AT3G29120)
CpG	637	chr1	5179518	5179848	331	11	1.17589	5.10003	0.000825466	0.0357728	Hypermethylated	37	No	Yes	No	No	Promoter	AT1G15030	2014		Encodes a Cysteine-rich peptide (CRP) family protein	AT1G15030	hypothetical protein (DUF789)(AT1G15030)
CpG	405	chr1	21026135	21026532	398	10	1.18007	5.5785	0.000315178	0.0201584	Hypermethylated	38	No	Yes	Yes	No	Promoter	AT1G56180	1533	VIR3		AT1G56180	ATP-dependent zinc metalloprotease(AT1G56180)
CpG	118	chr4	6766435	6767169	735	11	1.21182	7.75111	4.31863e-05	0.00484472	Hypermethylated	39	No	No	No	Yes	Promoter	AT4G11090	-106	MOAT1	Encodes a member of the TBL (TRICHOME BIREFRINGENCE-LIKE) gene family containing a plant-specific DUF231 (domain of unknown function) domain. TBL gene family has 46 members, two of which (TBR/AT5G06700 and TBL3/AT5G01360) have been shown to be involved in the synthesis and deposition of secondary wall cellulose, presumably by influencing the esterification state of pectic polymers. A nomenclature…	TBL23	TRICHOME BIREFRINGENCE-LIKE 23(TBL23)
CpG	184	chr4	53149	53516	368	24	1.24105	6.56187	6.47794e-05	0.00562942	Hypermethylated	40	No	Yes	No	No	Promoter	AT4G00140	0	EDA34		EDA34	Calcium-binding EF-hand family protein(EDA34)
CpG	14	chr1	27932858	27933802	945	15	1.2881	12.677	1.50085e-05	0.00497102	Hypermethylated	41	No	No	No	Yes	Promoter	AT1G74290	1022			AT1G74290	alpha/beta-Hydrolases superfamily protein(AT1G74290)
CpG	150	chr1	25343884	25344632	749	32	1.27708	7.32396	4.50254e-05	0.00927924	Hypermethylated	41	Yes	Yes	No	No	Promoter	AT1G67626	0			AT1G67626	pseudo(AT1G67626)
CpG	73	chr3	16532041	16533023	983	16	1.35084	12.7585	1.76853e-05	0.0096183	Hypermethylated	43	No	No	No	Yes	Promoter	AT3G45150	862	TCP16		TCP16	TCP domain protein 16(TCP16)
CpG	85	chr2	19320222	19320769	548	19	1.37271	11.7599	2.02901e-05	0.00781648	Hypermethylated	44	No	Yes	No	No	Promoter	AT2G47020	1677			AT2G47020	Peptide chain release factor 1(AT2G47020)
CpG	211	chr1	21095819	21096373	555	15	1.39607	6.4708	7.50424e-05	0.0103872	Hypermethylated	44	No	Yes	No	No	Promoter	AT1G56350	1076			AT1G56350	Peptide chain release factor 2(AT1G56350)
CpG	84	chr2	8956376	8956841	466	10	1.42159	10.5459	2.02901e-05	0.00781648	Hypermethylated	45	No	No	No	Yes	Promoter	AT2G20805	207			AT2G20805	DNA-binding storekeeper protein transcriptional regulator-like protein(AT2G20805)
CpG	149	chr1	24940650	24941189	540	10	1.40458	7.5165	4.50254e-05	0.00927924	Hypermethylated	45	No	No	No	Yes	Promoter	AT1G66855	-637			AT1G66855	Carbohydrate-binding X8 domain superfamily protein(AT1G66855)
CpG	288	chr2	9333113	9333915	803	20	1.45598	6.77057	0.000182611	0.0282724	Hypermethylated	46	No	No	No	Yes	Promoter	AT2G21895	0			AT2G21895	miscRNA(AT2G21895)
CpG	6	chr1	21858004	21858629	626	13	1.48034	11.9879	1.50085e-05	0.00497102	Hypermethylated	47	No	No	No	Yes	Promoter	AT1G08253	684
CpG	7	chr1	16491823	16492726	904	14	1.4766	14.4685	1.50085e-05	0.00497102	Hypermethylated	47	No	No	No	Yes	Promoter	AT1G43715	-484			AT1G43715	pseudo(AT1G43715)
CpG	34	chr5	15430638	15431550	913	22	1.4745	8.50174	1.57448e-05	0.00279936	Hypermethylated	47	No	No	No	Yes	Promoter	AT5G38540	0			AT5G38540	Mannose-binding lectin superfamily protein(AT5G38540)
CpG	83	chr2	14653118	14654088	971	13	1.47701	10.3794	2.02901e-05	0.00781648	Hypermethylated	47	No	No	No	Yes	Promoter	AT2G34730	-69			AT2G34730	myosin heavy chain-like protein(AT2G34730)
CpG	538	chr1	8452261	8452967	707	11	1.51044	5.3149	0.000540305	0.0282843	Hypermethylated	48	No	No	No	Yes	Promoter	AT1G23910	-972			AT1G23910	Polyketide cyclase/dehydrase and lipid transport superfamily protein(AT1G23910)
CpG	269	chr1	20509672	20510222	551	10	1.5681	6.23365	0.000165093	0.0181058	Hypermethylated	50	No	No	No	Yes	Promoter	AT1G54985	0			AT1G54985	miscRNA(AT1G54985)
CpG	155	chr5	15623632	15624126	495	13	1.59425	6.65805	4.72344e-05	0.00734833	Hypermethylated	51	No	No	No	Yes	Promoter	AT5G39040	-1334	ABCB27	Encodes a member of TAP subfamily of ABC transporters that is located in the vacuole. Mutants are hypersensitive to aluminum and the gene product may be important for intracellular movement of some substrate, possibly chelated Al, as part of a mechanism of aluminum sequestration.	ABCB27	transporter associated with antigen processing protein 2(ABCB27)
CpG	71	chr3	11584989	11586363	1375	24	1.71154	14.9585	1.76853e-05	0.0096183	Hypermethylated	54	No	No	No	Yes	Promoter	AT3G05955	185
CpG	4	chr1	28515048	28516074	1027	44	1.89856	14.6557	1.50085e-05	0.00497102	Hypermethylated	60	No	Yes	No	No	Promoter	AT1G75945	0
CpG	70	chr3	3120225	3120469	245	14	1.92271	26.2794	1.76853e-05	0.0096183	Hypermethylated	61	No	No	Yes	No	Promoter	AT3G10114	734			AT3G10114	miscRNA(AT3G10114)
CpG	95	chr4	2309165	2310568	1404	25	2.03978	24.6888	2.15931e-05	0.00484472	Hypermethylated	65	No	No	No	Yes	Promoter	AT4G04601	0			AT4G04601	uncharacterized protein(AT4G04601)
CpG	2	chr1	13353597	13354670	1074	22	2.06497	60.5671	1.50085e-05	0.00497102	Hypermethylated	66	No	No	No	Yes	Promoter	AT1G35895	0
CpG	28	chr5	18779966	18780349	384	12	2.12137	45.5167	1.57448e-05	0.00279936	Hypermethylated	68	No	No	No	Yes	Promoter	AT5G46295	0			AT5G46295	uncharacterized protein(AT5G46295)
CpG	68	chr3	16584321	16584848	528	17	2.16861	53.5313	1.76853e-05	0.0096183	Hypermethylated	69	No	No	No	Yes	Promoter	AT3G45250	598			AT3G45250	pseudo(AT3G45250)
CpG	1	chr1	11407058	11407573	516	11	2.18775	53.4087	1.50085e-05	0.00497102	Hypermethylated	70	No	No	No	Yes	Promoter	AT1G31810	-249	AFH14	Encodes the Type II Arabidopsis formin14. Interacts with microtubules and microfilaments to regulate cell division.	AFH14	Formin Homology 14(AFH14)
CHG	31	chr4	13377377	13377723	347	11	-1.84759	-14.4564	3.76294e-05	0.00397393	Hypomethylated	-59	No	No	No	Yes	Promoter	AT4G26485	781			AT4G26485	methyltransferase small domain protein(AT4G26485)
CHG	38	chr5	17877939	17878400	462	10	-1.65623	-9.42704	6.10967e-05	0.00646228	Hypomethylated	-53	No	No	No	Yes	Promoter	AT5G44375	-187			AT5G44375	tRNA-Val(AT5G44375)
CHG	2	chr5	19829692	19830377	686	51	-1.4133	-21.6635	3.05483e-05	0.00514045	Hypomethylated	-45	No	No	No	Yes	Promoter	AT5G07295	0
CHG	95	chr5	3629186	3629586	401	14	-1.41264	-6.8488	0.00128303	0.0337286	Hypomethylated	-45	No	No	No	Yes	Promoter	AT5G11370	1337			AT5G11370	FBD / Leucine Rich Repeat domains containing protein(AT5G11370)
CHG	30	chr3	15776930	15777539	610	27	-1.31971	-25.2102	3.21958e-05	0.00820496	Hypomethylated	-42	No	No	No	Yes	Promoter	AT3G43970	457			AT3G43970	uncharacterized protein(AT3G43970)
CHG	32	chr4	5987206	5988580	1375	80	-1.29762	-22.6479	3.76294e-05	0.00397393	Hypomethylated	-41	No	No	No	Yes	Promoter	AT4G09455	0			AT4G09455	pseudo(AT4G09455)
CHG	10	chr2	7632780	7633721	942	35	-1.23987	-22.5067	3.11944e-05	0.00672136	Hypomethylated	-39	No	Yes	Yes	No	Promoter	AT2G06995	0
CHG	33	chr4	8087771	8088809	1039	39	-1.23392	-22.9083	3.76294e-05	0.00397393	Hypomethylated	-39	No	No	No	Yes	Promoter	AT4G13992	461			AT4G13992	Cysteine/Histidine-rich C1 domain family protein(AT4G13992)
CHG	64	chr2	12773675	12774325	651	39	-1.13921	-11.2582	0.000124778	0.0107256	Hypomethylated	-36	No	No	No	Yes	Promoter	AT2G08355	449
CHG	11	chr2	17362922	17363719	798	30	-1.09235	-13.6235	3.11944e-05	0.00672136	Hypomethylated	-35	No	No	No	Yes	Promoter	AT2G41640	2503	GT61		AT2G41640	Glycosyltransferase family 61 protein(AT2G41640)
CHG	48	chr3	1559185	1560742	1558	108	-1.03278	-16.0833	6.43915e-05	0.00820496	Hypomethylated	-33	No	No	No	Yes	Promoter	AT3G05415	0			AT3G05415	pseudo(AT3G05415)
CHG	59	chr3	21547307	21547929	623	20	-1.04088	-11.6334	9.65873e-05	0.00820496	Hypomethylated	-33	No	No	No	Yes	Promoter	AT3G58190	1643	ASL16	This gene contains two auxin-responsive element (AuxRE).	LBD29	lateral organ boundaries-domain 29(LBD29)
CHG	4	chr5	14088938	14089852	915	53	-0.959323	-20.8125	3.05483e-05	0.00514045	Hypomethylated	-31	No	No	No	Yes	Promoter	AT5G35935	39			AT5G35935	pseudo(AT5G35935)
CHG	92	chr5	6789082	6789690	609	25	-0.979496	-7.1943	0.000946999	0.0321632	Hypomethylated	-31	No	No	No	Yes	Promoter	AT5G20100	-245	MASS3		AT5G20100	plant/protein(AT5G20100)
CHG	19	chr1	23754870	23755663	794	30	-0.902942	-13.2283	3.18228e-05	0.0026167	Hypomethylated	-29	No	Yes	No	No	Promoter	AT1G64035	2073			AT1G64035	miscRNA(AT1G64035)
CHG	39	chr5	18136746	18137177	432	14	-0.910852	-9.78718	6.10967e-05	0.00646228	Hypomethylated	-29	No	No	No	Yes	Promoter	AT5G44910	-172			AT5G44910	Toll-Interleukin-Resistance (TIR) domain family protein(AT5G44910)
CHG	79	chr2	18845786	18846019	234	16	-0.901328	-8.70265	0.000343139	0.0120546	Hypomethylated	-29	No	No	Yes	No	Promoter	AT2G45760	1816	BAL	Encodes a protein that is similar to BONZAI1-binding protein BAP1.	BAP2	BON association protein 2(BAP2)
CHG	56	chr2	2082147	2082759	613	37	-0.894607	-11.7104	9.35833e-05	0.00945191	Hypomethylated	-28	No	No	No	Yes	Promoter	AT2G05620	-288	AtPGR5	Involved in electron flow in Photosystem I. Essential for photoprotection.	PGR5	proton gradient regulation 5(PGR5)
CHG	50	chr3	12799318	12800127	810	52	-0.835735	-15.8419	6.43915e-05	0.00820496	Hypomethylated	-27	No	No	Yes	Yes	Promoter	AT3G31430	-2447			AT3G31430	zinc knuckle (CCHC-type) family protein(AT3G31430)
CHG	60	chr3	20853426	20854011	586	30	-0.837349	-12.4379	9.65873e-05	0.00820496	Hypomethylated	-27	No	No	No	Yes	Promoter	AT3G56210	1548			AT3G56210	ARM repeat superfamily protein(AT3G56210)
CHG	102	chr1	2334945	2335586	642	11	-0.81949	-6.29011	0.0022276	0.0369699	Hypomethylated	-26	No	No	No	Yes	Promoter	AT1G07580	123			AT1G07580	tRNA-Ala(AT1G07580)
CHG	5	chr5	8398517	8399123	607	19	-0.781034	-10.2224	3.05483e-05	0.00514045	Hypomethylated	-25	No	No	No	Yes	Promoter	AT5G24557	-2420			AT5G24557	miscRNA(AT5G24557)
CHG	40	chr5	14007147	14007607	461	16	-0.780701	-9.97524	6.10967e-05	0.00646228	Hypomethylated	-25	No	No	No	Yes	Promoter	AT5G35840	-205	PHYC	Encodes the apoprotein of phytochrome;one of a family of photoreceptors that modulate plant growth and development.	PHYC	phytochrome C(PHYC)
CHG	6	chr5	8586055	8587138	1084	31	-0.762742	-14.1321	3.05483e-05	0.00514045	Hypomethylated	-24	No	No	Yes	No	Promoter	AT5G24920	1520	AtGDU5	Encodes a member of the GDU (glutamine dumper) family proteins involved in amino acid export: At4g31730 (GDU1), At4g25760 (GDU2), At5g57685 (GDU3), At2g24762 (GDU4), At5g24920 (GDU5), At3g30725 (GDU6) and At5g38770 (GDU7).	GDU5	glutamine dumper 5(GDU5)
CHG	36	chr4	15627234	15628567	1334	43	-0.756897	-17.3747	3.76294e-05	0.00397393	Hypomethylated	-24	No	No	No	Yes	Promoter	AT4G32370	1676			AT4G32370	Pectin lyase-like superfamily protein(AT4G32370)
CHG	69	chr1	9453663	9454441	779	22	-0.753934	-8.35259	0.000159114	0.00548262	Hypomethylated	-24	No	No	Yes	No	Promoter	AT1G06047	1031
CHG	80	chr2	15381808	15382250	443	19	-0.765072	-9.1294	0.000343139	0.0120546	Hypomethylated	-24	No	No	No	Yes	Promoter	AT2G36690	2148	GAS2		AT2G36690	2-oxoglutarate (2OG) and Fe(II)-dependent oxygenase superfamily protein(AT2G36690)
CHG	97	chr3	7857148	7857955	808	14	-0.769182	-6.95035	0.00183516	0.035764	Hypomethylated	-24	No	No	No	Yes	Promoter	AT3G22235	-1334	AthCYSTM8		AT3G22235	cysteine-rich TM module stress tolerance protein(AT3G22235)
CHG	101	chr4	9048969	9049271	303	12	-0.762647	-6.59508	0.00214487	0.0484152	Hypomethylated	-24	No	Yes	Yes	No	Promoter	AT4G15970	-57			AT4G15970	Nucleotide-diphospho-sugar transferase family protein(AT4G15970)
CHG	7	chr5	10031134	10031869	736	48	-0.723269	-16.4935	3.05483e-05	0.00514045	Hypomethylated	-23	No	Yes	No	No	Promoter	AT5G28030	809	DES1		DES1	L-cysteine desulfhydrase 1(DES1)
CHG	23	chr1	21341681	21342268	588	30	-0.728431	-11.5687	3.18228e-05	0.0026167	Hypomethylated	-23	No	No	No	Yes	Promoter	AT1G57620	-359	CYB		AT1G57620	emp24/gp25L/p24 family/GOLD family protein(AT1G57620)
CHG	24	chr1	24571969	24572963	995	46	-0.720599	-14.9417	3.18228e-05	0.0026167	Hypomethylated	-23	No	No	No	Yes	Promoter	AT1G65990	508	PRXIIA		AT1G65990	type 2 peroxiredoxin-related / thiol specific antioxidant / mal allergen family protein(AT1G65990)
CHG	25	chr1	6721931	6722600	670	27	-0.714977	-11.9025	3.18228e-05	0.0026167	Hypomethylated	-23	No	Yes	No	No	Promoter	AT1G19420	514			AT1G19420	miscRNA(AT1G19420)
CHG	43	chr1	28470097	28471014	918	35	-0.720368	-9.40102	6.36456e-05	0.00418672	Hypomethylated	-23	No	No	No	Yes	Promoter	AT1G09583	0
CHG	73	chr4	6357907	6358323	417	13	-0.721863	-8.49659	0.000188147	0.00942966	Hypomethylated	-23	No	No	No	Yes	Promoter	AT4G10201	2168			AT4G10201	miscRNA(AT4G10201)
CHG	99	chr2	11740056	11740688	633	23	-0.713418	-6.97876	0.00187167	0.0315387	Hypomethylated	-23	No	No	No	Yes	Promoter	AT2G27460	0	AtSEC23D		AT2G27460	sec23/sec24 transport family protein(AT2G27460)
CHG	27	chr1	16881311	16882272	962	47	-0.684494	-12.0075	3.18228e-05	0.0026167	Hypomethylated	-22	No	No	No	Yes	Promoter	AT1G44707	670			AT1G44707	pseudo(AT1G44707)
CHG	90	chr5	21013962	21014923	962	22	-0.702913	-7.39069	0.000824805	0.0296449	Hypomethylated	-22	No	No	No	Yes	Promoter	AT5G07775	0
CHG	28	chr1	26710681	26711313	633	37	-0.650038	-11.5657	3.18228e-05	0.0026167	Hypomethylated	-21	No	No	No	Yes	Promoter	AT1G70830	149	MLP28		MLP28	MLP-like protein 28(MLP28)
CHG	52	chr3	14273980	14274975	996	42	-0.674177	-14.6601	6.43915e-05	0.00820496	Hypomethylated	-21	No	No	No	Yes	Promoter	AT3G42090	0			AT3G42090	pseudo(AT3G42090)
CHG	53	chr3	11509438	11510330	893	53	-0.668673	-16.763	6.43915e-05	0.00820496	Hypomethylated	-21	No	No	No	Yes	Promoter	AT3G05945	180
CHG	71	chr1	17695637	17696024	388	20	-0.671143	-8.23031	0.000159114	0.00548262	Hypomethylated	-21	No	No	No	Yes	Promoter	AT1G07463	0
CHG	72	chr3	11100928	11101331	404	25	-0.650326	-10.4075	0.000160979	0.01094	Hypomethylated	-21	No	No	No	Yes	Promoter	AT3G29130	2178			AT3G29130	kxDL motif protein(AT3G29130)
CHG	96	chr2	637790	638348	559	31	-0.646294	-7.24934	0.00137256	0.0262491	Hypomethylated	-21	No	No	No	Yes	Promoter	AT2G02440	0			AT2G02440	uncharacterized protein(AT2G02440)
CHG	54	chr5	13588964	13589825	862	53	-0.63295	-9.2254	9.1645e-05	0.00807785	Hypomethylated	-20	Yes	Yes	No	No	Promoter	AT5G35370	1446			AT5G35370	S-locus lectin protein kinase family protein(AT5G35370)
CHG	62	chr3	10358808	10360408	1601	37	-0.613066	-11.1805	9.65873e-05	0.00820496	Hypomethylated	-20	No	No	No	Yes	Promoter	AT3G27910	-527			AT3G27910	Galactose oxidase/kelch repeat superfamily protein(AT3G27910)
CHG	82	chr2	2727832	2728849	1018	13	-0.640153	-8.24402	0.000436722	0.012168	Hypomethylated	-20	No	No	No	Yes	Promoter	AT2G06822	226			AT2G06822	miscRNA(AT2G06822)
CHG	29	chr1	25343564	25344369	806	45	0.635556	11.623	3.18228e-05	0.0026167	Hypermethylated	20	Yes	Yes	No	No	Promoter	AT1G67626	0			AT1G67626	pseudo(AT1G67626)
CHG	44	chr1	12019976	12020448	473	19	0.643104	9.48054	6.36456e-05	0.00418672	Hypermethylated	20	No	Yes	No	No	Promoter	AT1G33135	1293			AT1G33135	pseudo(AT1G33135)
CHG	67	chr5	10236465	10237931	1467	45	0.638401	8.73836	0.000152742	0.00807785	Hypermethylated	20	No	No	No	Yes	Promoter	AT5G28260	-459			AT5G28260	pseudo(AT5G28260)
CHG	77	chr2	4507726	4508479	754	30	0.616519	9.78048	0.000311944	0.0120546	Hypermethylated	20	No	No	No	Yes	Promoter	AT2G11330	-763			AT2G11330	pseudo(AT2G11330)
CHG	66	chr5	18538699	18540837	2139	30	0.653	8.44178	0.000152742	0.00807785	Hypermethylated	21	No	No	No	Yes	Promoter	AT5G45710	0	AT-HSFA4C	Member of Heat Stress Transcription Factor (Hsf) family	RHA1	winged-helix DNA-binding transcription factor family protein(RHA1)
CHG	70	chr1	24733235	24733628	394	21	0.673463	8.32724	0.000159114	0.00548262	Hypermethylated	21	No	No	No	Yes	Promoter	AT1G66340	-534	AtETR1	Similar to prokaryote sensory transduction proteins. Contains a histidine kinase and a response regulator domain. Homodimer. Membrane component. Binds ethylene. Mutations affect ethylene binding and metabolism of other plant hormones such as auxin, cytokinins, ABA and gibberellic acid. Ethylene receptor. Has histidine kinase activity. Is regulated by RTE1.	ETR1	Signal transduction histidine kinase, hybrid-type, ethylene sensor(ETR1)
CHG	78	chr3	11761017	11761582	566	24	0.667122	8.7221	0.000321958	0.0119848	Hypermethylated	21	No	No	No	Yes	Promoter	AT3G30122	0			AT3G30122	miscRNA(AT3G30122)
CHG	93	chr2	2308180	2308697	518	25	0.651227	7.36443	0.001123	0.0222671	Hypermethylated	21	No	No	No	Yes	Promoter	AT2G05970	1087	AtFDB12		AT2G05970	F-box protein (DUF295)(AT2G05970)
CHG	103	chr2	7696302	7697053	752	23	0.654902	6.46261	0.00308825	0.0381896	Hypermethylated	21	No	No	No	Yes	Promoter	AT2G17720	-258	P4H5		P4H5	2-oxoglutarate (2OG) and Fe(II)-dependent oxygenase superfamily protein(P4H5)
CHG	8	chr5	15623442	15623968	527	27	0.679399	16.3798	3.05483e-05	0.00514045	Hypermethylated	22	No	No	No	Yes	Promoter	AT5G39040	-1492	ABCB27	Encodes a member of TAP subfamily of ABC transporters that is located in the vacuole. Mutants are hypersensitive to aluminum and the gene product may be important for intracellular movement of some substrate, possibly chelated Al, as part of a mechanism of aluminum sequestration.	ABCB27	transporter associated with antigen processing protein 2(ABCB27)
CHG	61	chr3	11097249	11098610	1362	51	0.696792	11.2357	9.65873e-05	0.00820496	Hypermethylated	22	No	No	No	Yes	Promoter	AT3G29120	0			AT3G29120	pseudo(AT3G29120)
CHG	75	chr3	4086867	4087378	512	24	0.6852	9.84431	0.000257566	0.01094	Hypermethylated	22	No	No	No	Yes	Promoter	AT3G12840	-897			AT3G12840	F-box/FBD-like domain protein(AT3G12840)
CHG	76	chr2	14010460	14010782	323	18	0.676341	9.84649	0.000311944	0.0120546	Hypermethylated	22	No	No	Yes	Yes	Promoter	AT2G33010	-56			AT2G33010	Ubiquitin-associated (UBA) protein(AT2G33010)
CHG	83	chr1	21858100	21858697	598	10	0.684435	7.62193	0.000445519	0.0117656	Hypermethylated	22	No	No	No	Yes	Promoter	AT1G08253	616
CHG	22	chr1	16491919	16492836	918	32	0.738128	16.3047	3.18228e-05	0.0026167	Hypermethylated	23	No	No	No	Yes	Promoter	AT1G43715	-580			AT1G43715	pseudo(AT1G43715)
CHG	26	chr1	21848993	21849731	739	35	0.710227	13.4164	3.18228e-05	0.0026167	Hypermethylated	23	No	No	No	Yes	Promoter	AT1G59453	0			AT1G59453	B-block-binding subunit of TFIIIC protein(AT1G59453)
CHG	37	chr4	9005648	9006712	1065	32	0.736012	13.8464	3.76294e-05	0.00397393	Hypermethylated	23	No	No	No	Yes	Promoter	AT4G15860	1455			AT4G15860	pseudo(AT4G15860)
CHG	65	chr5	3628164	3628776	613	27	0.713567	8.96904	0.000152742	0.00807785	Hypermethylated	23	No	No	No	Yes	Promoter	AT5G11370	315			AT5G11370	FBD / Leucine Rich Repeat domains containing protein(AT5G11370)
CHG	85	chr1	12549246	12550072	827	17	0.73143	7.51137	0.000509165	0.0125317	Hypermethylated	23	No	No	No	Yes	Promoter	AT1G34370	-267	AtSTOP1	Encodes a putative nuclear Cys(2)His(2)-type zinc finger protein involved in H+ and Al3+ rhizotoxicity. In mutants exposed to aluminum stress, there is no induction of AtALMT1, an malate transporter known to be involved in the mediation of aluminum toxicity.	STOP1	C2H2 and C2HC zinc fingers superfamily protein(STOP1)
CHG	89	chr2	9333237	9334044	808	17	0.707282	7.72352	0.000748666	0.0169209	Hypermethylated	23	No	No	No	Yes	Promoter	AT2G21895	0			AT2G21895	miscRNA(AT2G21895)
CHG	98	chr1	8497306	8497918	613	16	0.736466	6.48307	0.00184572	0.0325748	Hypermethylated	23	No	No	No	Yes	Promoter	AT1G24000	-740			AT1G24000	Polyketide cyclase/dehydrase and lipid transport superfamily protein(AT1G24000)
CHG	42	chr1	20509401	20510235	835	23	0.745202	9.49778	6.36456e-05	0.00418672	Hypermethylated	24	No	No	No	Yes	Promoter	AT1G54985	0			AT1G54985	miscRNA(AT1G54985)
CHG	63	chr5	13882915	13883465	551	17	0.76162	9.08319	0.000122193	0.00807785	Hypermethylated	24	No	No	No	Yes	Promoter	AT5G35715	1693	CYP71B8	Encodes a protein with cytochrome P450 domain	CYP71B8	cytochrome P450, family 71, subfamily B, polypeptide 8(CYP71B8)
CHG	51	chr3	11585582	11586306	725	42	0.787773	15.87	6.43915e-05	0.00820496	Hypermethylated	25	No	No	No	Yes	Promoter	AT3G05955	242
CHG	49	chr3	7714214	7714771	558	49	0.853318	13.5959	6.43915e-05	0.00820496	Hypermethylated	27	No	No	No	Yes	Promoter	AT3G21900	-577			AT3G21900	Receptor-like protein kinase-related family protein(AT3G21900)
CHG	87	chr5	13907567	13908397	831	25	0.840506	7.52304	0.00073316	0.0288495	Hypermethylated	27	No	No	No	Yes	Promoter	AT5G05275	0
CHG	20	chr1	16925397	16925716	320	16	0.887265	10.4784	3.18228e-05	0.0026167	Hypermethylated	28	No	No	No	Yes	Promoter	AT1G44820	-581			AT1G44820	Peptidase M20/M25/M40 family protein(AT1G44820)
CHG	21	chr1	13353605	13354071	467	34	0.870422	19.3437	3.18228e-05	0.0026167	Hypermethylated	28	No	No	No	Yes	Promoter	AT1G35895	154
CHG	104	chr2	14653051	14653726	676	10	0.875938	6.16095	0.00414886	0.0457964	Hypermethylated	28	No	No	No	Yes	Promoter	AT2G34730	-431			AT2G34730	myosin heavy chain-like protein(AT2G34730)
CHG	91	chr1	26185822	26186168	347	16	0.919318	7.09479	0.000827393	0.0169125	Hypermethylated	29	No	No	Yes	No	Promoter	AT1G09077	428
CHG	16	chr1	8452237	8452892	656	31	0.946473	12.7702	3.18228e-05	0.0026167	Hypermethylated	30	No	No	No	Yes	Promoter	AT1G23910	-948			AT1G23910	Polyketide cyclase/dehydrase and lipid transport superfamily protein(AT1G23910)
CHG	18	chr1	11407068	11407541	474	17	0.932523	12.9015	3.18228e-05	0.0026167	Hypermethylated	30	No	No	No	Yes	Promoter	AT1G31810	-259	AFH14	Encodes the Type II Arabidopsis formin14. Interacts with microtubules and microfilaments to regulate cell division.	AFH14	Formin Homology 14(AFH14)
CHG	86	chr4	10559027	10559594	568	11	0.937688	7.59107	0.000677328	0.0247267	Hypermethylated	30	No	No	No	Yes	Promoter	AT4G19340	-16			AT4G19340	SCD6 protein-like protein(AT4G19340)
CHG	41	chr1	11066605	11067127	523	40	0.978923	9.37882	6.36456e-05	0.00418672	Hypermethylated	31	No	No	No	Yes	Promoter	AT1G31030	74			AT1G31030	pseudo(AT1G31030)
CHG	88	chr3	7286328	7287056	729	23	0.971881	7.96783	0.000740502	0.020444	Hypermethylated	31	No	Yes	No	No	Promoter	AT3G20830	0	AGC2-4		UCNL	AGC (cAMP-dependent, cGMP-dependent and protein kinase C) kinase family protein(UCNL)
CHG	68	chr1	9202651	9203228	578	32	1.01067	8.6255	0.000159114	0.00548262	Hypermethylated	32	No	No	No	Yes	Promoter	AT1G26630	-2572	ATELF5A-2	Eukaryotic translation initiation factor 5A-2. Involved in programmed cell death triggered as a response to pseudomonas syringae infection. Loss of function mutants are more resistant to infection.	FBR12	Eukaryotic translation initiation factor 5A-1 (eIF-5A 1) protein(FBR12)
CHG	15	chr1	27932588	27933518	931	32	1.03331	19.5471	3.18228e-05	0.0026167	Hypermethylated	33	No	No	No	Yes	Promoter	AT1G74290	752			AT1G74290	alpha/beta-Hydrolases superfamily protein(AT1G74290)
CHG	58	chr3	3120224	3121088	865	18	1.06464	12.1091	9.65873e-05	0.00820496	Hypermethylated	34	No	Yes	Yes	No	Promoter	AT3G10114	733			AT3G10114	miscRNA(AT3G10114)
CHG	74	chr1	18457930	18458362	433	13	1.05819	7.99415	0.000254582	0.00761223	Hypermethylated	34	No	Yes	No	No	Promoter	AT1G49860	-164	ATGSTF14	Encodes glutathione transferase belonging to the phi class of GSTs. Naming convention according to Wagner et al. (2002).	GSTF14	glutathione S-transferase (class phi) 14(GSTF14)
CHG	81	chr2	6830204	6830653	450	22	1.08064	8.22437	0.000436722	0.012168	Hypermethylated	34	No	No	No	Yes	Promoter	AT2G15680	-342	AtCML30		CML30	Calcium-binding EF-hand family protein(CML30)
CHG	34	chr4	2309138	2310379	1242	49	1.1622	26.9332	3.76294e-05	0.00397393	Hypermethylated	37	No	No	No	Yes	Promoter	AT4G04601	0			AT4G04601	uncharacterized protein(AT4G04601)
CHG	46	chr3	16584304	16585142	839	23	1.24713	16.3365	6.43915e-05	0.00820496	Hypermethylated	40	No	No	No	Yes	Promoter	AT3G45250	581			AT3G45250	pseudo(AT3G45250)
CHG	47	chr3	11121682	11122339	658	36	1.24384	14.7992	6.43915e-05	0.00820496	Hypermethylated	40	No	No	No	Yes	Promoter	AT3G29153	-1105			AT3G29153	pseudo(AT3G29153)
CHG	94	chr3	6335728	6336446	719	11	1.24235	7.35165	0.00122344	0.0279535	Hypermethylated	40	No	No	No	Yes	Promoter	AT3G18470	0			AT3G18470	PLAC8 family protein(AT3G18470)
CHG	14	chr1	28515039	28516018	980	55	1.30084	20.1505	3.18228e-05	0.0026167	Hypermethylated	41	No	Yes	No	No	Promoter	AT1G75945	0
CHG	13	chr1	17234272	17234797	526	30	1.43494	24.6494	3.18228e-05	0.0026167	Hypermethylated	46	No	No	No	Yes	Promoter	AT1G46408	-1321	AGL97		AGL97	AGAMOUS-like 97(AGL97)
CHG	1	chr5	18779744	18780332	589	26	1.53509	15.0776	3.05483e-05	0.00514045	Hypermethylated	49	No	No	No	Yes	Promoter	AT5G46295	0			AT5G46295	uncharacterized protein(AT5G46295)
CHG	9	chr2	5075847	5077994	2148	144	1.54954	53.532	3.11944e-05	0.00672136	Hypermethylated	49	No	No	No	Yes	Promoter	AT2G12490	1463			AT2G12490	pseudo(AT2G12490)
CHG	55	chr2	14753423	14753839	417	17	1.72539	11.6871	9.35833e-05	0.00945191	Hypermethylated	55	No	Yes	No	No	Promoter	AT2G35000	-104	ATL2G	E3 ligase-like protein induced by chitin oligomers.	ATL9	RING/U-box superfamily protein(ATL9)
CHH	82	chr2	19697352	19697534	183	57	-0.978089	-7.90695	0.0123448	0.0706335	Hypomethylated	-31	No	No	No	No	Promoter	AT2G48160	-531	HULK2		AT2G48160	Tudor/PWWP/MBT domain-containing protein(AT2G48160)
CHH	20	chr2	12773511	12774356	846	265	-0.693585	-16.1886	0.000269833	0.0142176	Hypomethylated	-22	No	No	No	Yes	Promoter	AT2G08355	418
CHH	12	chr2	7632633	7633855	1223	266	-0.624316	-21.0366	0.000134916	0.0121042	Hypomethylated	-20	No	Yes	Yes	No	Promoter	AT2G06995	0
CHH	52	chr5	15689923	15690084	162	26	0.632021	9.96425	0.00197918	0.0502459	Hypermethylated	20	No	No	No	Yes	Promoter	AT5G39185	-218			AT5G39185	pseudo(AT5G39185)
CHH	45	chr2	9333172	9334066	895	242	0.654289	11.7647	0.00148408	0.0231287	Hypermethylated	21	No	No	No	Yes	Promoter	AT2G21895	0			AT2G21895	miscRNA(AT2G21895)
CHH	82	chr2	19697352	19697534	183	57	-0.978089	-7.90695	0.0123448	0.0706335	Hypomethylated	-31	No	No	No	No	Promoter	AT2G48160	-531	HULK2		AT2G48160	Tudor/PWWP/MBT domain-containing protein(AT2G48160)
CHH	20	chr2	12773511	12774356	846	265	-0.693585	-16.1886	0.000269833	0.0142176	Hypomethylated	-22	No	No	No	Yes	Promoter	AT2G08355	418
CHH	12	chr2	7632633	7633855	1223	266	-0.624316	-21.0366	0.000134916	0.0121042	Hypomethylated	-20	No	Yes	Yes	No	Promoter	AT2G06995	0
CHH	52	chr5	15689923	15690084	162	26	0.632021	9.96425	0.00197918	0.0502459	Hypermethylated	20	No	No	No	Yes	Promoter	AT5G39185	-218			AT5G39185	pseudo(AT5G39185)
CHH	45	chr2	9333172	9334066	895	242	0.654289	11.7647	0.00148408	0.0231287	Hypermethylated	21	No	No	No	Yes	Promoter	AT2G21895	0			AT2G21895	miscRNA(AT2G21895)

## Sheet: Exon
Context	Index	chr	start	end	width	CpGs	betaCoefficient	statistic	p.value	q.value	direction	difference	CpG.Island	CpG.Shore	CpG.Shelf	Open.Sea	annotation	geneId	distanceToTSS	geneSymbol	gene	OFFICIAL_GENE_SYMBOL	Gene Name
CpG	199	chr3	20004396	20004817	422	12	-1.40387	-7.83778	7.07414e-05	0.016832	Hypomethylated	-45	No	No	No	Yes	Exon	AT3G54010	3575	DEI1	Immunophilin-like protein similar to the p59 FK506-binding protein (FKBP52). Shows rotamase activity and contains an FKBP-like domain and three tetratricopeptide repeat units. Members of this class of mutation show ectopic cell proliferation in cotyledons. Gene may be alternatively spliced.	PAS1	FKBP-type peptidyl-prolyl cis-trans isomerase family protein(PAS1)
CpG	522	chr1	22569835	22570290	456	14	-1.05524	-5.36531	0.000525297	0.0282843	Hypomethylated	-34	No	No	No	Yes	Exon	AT1G61210	5476	DWA3		DWA3	Transducin/WD40 repeat-like superfamily protein(DWA3)
CpG	306	chr1	7773685	7774061	377	11	-1.04907	-6.03435	0.00019511	0.0181058	Hypomethylated	-33	No	No	No	Yes	Exon	AT1G22060	7478			AT1G22060	sporulation-specific protein(AT1G22060)
CpG	346	chr1	29108731	29109519	789	24	-1.0479	-5.66789	0.000240136	0.0181058	Hypomethylated	-33	No	No	No	Yes	Exon	AT1G77460	5123	CSI3		AT1G77460	CELLULOSE SYNTHASE INTERACTIVE 3(AT1G77460)
CpG	123	chr4	6293276	6294085	810	25	-0.994197	-6.69495	4.31863e-05	0.00484472	Hypomethylated	-32	No	No	No	Yes	Exon	AT4G10060	4455	GCD3		AT4G10060	Beta-glucosidase, GBA2 type family protein(AT4G10060)
CpG	177	chr5	6279176	6279847	672	12	-0.970322	-6.44753	6.29792e-05	0.00844115	Hypomethylated	-31	No	No	Yes	No	Exon	AT5G18830	3281	ATSPL7	Encodes a member of the Squamosa Binding Protein family of transcriptional regulators. SPL7 is expressed highly in roots and appears to play a role in copper homeostasis. Mutants are hypersensitive to copper deficient conditions and display a retarded growth phenotype. SPL7 binds to the promoter of the copper responsive miRNAs miR398b and miR389c.	SPL7	squamosa promoter binding protein-like 7(SPL7)
CpG	505	chr4	14210523	14211151	629	13	-0.957341	-5.41787	0.000496642	0.0202933	Hypomethylated	-30	No	No	No	Yes	Exon	AT4G28760	3063	TRM20		TRM20	methyl-coenzyme M reductase II subunit gamma, putative (DUF3741)(TRM20)
CpG	163	chr1	24377663	24378260	598	20	-0.910046	-6.77455	6.00339e-05	0.00927924	Hypomethylated	-29	No	No	No	Yes	Exon	AT1G65580	5826	FRA3		FRA3	Endonuclease/exonuclease/phosphatase family protein(FRA3)
CpG	524	chr1	10129223	10129517	295	12	-0.820269	-5.35258	0.000525297	0.0282843	Hypomethylated	-26	No	No	No	Yes	Exon	AT1G29030	4444			AT1G29030	Apoptosis inhibitory protein 5 (API5)(AT1G29030)
CpG	50	chr5	20716072	20717012	941	41	-0.777937	-7.10336	1.57448e-05	0.00279936	Hypomethylated	-25	No	No	No	Yes	Exon	AT5G50920	3669	ATHSP93-V	Encodes a protein that is similar to ATP-dependent Clp protease ATP-binding subunit / ClpC. Involved in protein import into the chloroplast. May provide ATP source that drives the TIC (Translocon at the Inner envelope membrane of Chloroplasts) translocation machinery.	CLPC1	CLPC homologue 1(CLPC1)
CpG	719	chr1	18262243	18262929	687	13	-0.749304	-4.91929	0.00127572	0.0451566	Hypomethylated	-24	No	No	No	Yes	Exon	AT1G49340	10193	ATPI4K	Encodes a phosphatidylinositol 4-kinase that is expressed in inflorescences and shoots.	ATPI4K ALPHA	Phosphatidylinositol 3- and 4-kinase family protein(ATPI4K ALPHA)
CpG	279	chr3	12596022	12596876	855	27	-0.736793	-6.62312	0.000176853	0.0269312	Hypomethylated	-23	No	No	No	Yes	Exon	AT3G30842	3556	ABCG38		ABCG38	pleiotropic drug resistance 10(ABCG38)
CpG	375	chr4	18327543	18328331	789	38	-0.708999	-5.78538	0.000259118	0.0144032	Hypomethylated	-23	No	No	No	Yes	Exon	AT4G39400	3086	ATBRI1	Encodes a plasma membrane localized leucine-rich repeat receptor kinase involved in brassinosteroid signal transduction. BRI1 ligand is brassinolide which binds at the extracellular domain. Binding results in phosphorylation of the kinase domain which activates the BRI1 protein leading to BR responses. Residue T-1049 and either S-1044 or T-1045 were essential for kinase function in vitro and norm…	BRI1	Leucine-rich receptor-like protein kinase family protein(BRI1)
CpG	352	chr1	4469427	4470127	701	25	-0.680458	-5.78828	0.000240136	0.0181058	Hypomethylated	-22	No	No	No	Yes	Exon	AT1G13120	3192	AtGLE1		GLE1	nucleoporin GLE1-like protein(GLE1)
CpG	573	chr1	1794888	1795762	875	15	-0.692858	-5.24681	0.000585331	0.0285703	Hypomethylated	-22	No	No	No	Yes	Exon	AT1G05910	4672	BRAT1		AT1G05910	cell division cycle protein 48-related / CDC48-like protein(AT1G05910)
CpG	559	chr1	21679670	21680256	587	21	-0.648197	-5.27128	0.000570322	0.0282843	Hypomethylated	-21	No	No	Yes	No	Exon	AT1G58360	3282	AAP1	Encodes AAP1 (amino acid permease 1), a neutral amino acid transporter expressed in seeds. Functions in amino acid uptake into embryos.	AAP1	amino acid permease 1(AAP1)
CpG	355	chr1	2668157	2668849	693	17	-0.637591	-5.77454	0.000240136	0.0181058	Hypomethylated	-20	No	No	Yes	Yes	Exon	AT1G08450	3043	AtCRT3	Encodes one of three Arabidopsis calreticulins. In CRT-deficient mouse fibroblasts, this protein restores ER Ca2+ levels. Non-receptor component required for EFR-mediated immunity. Mutants show de-repressed anthocyanin accumulation in the presence of elf18, and EFR accumulation and signalling.	CRT3	calreticulin 3(CRT3)
CpG	576	chr2	1401481	1401905	425	15	-0.639671	-5.67456	0.000588414	0.0458753	Hypomethylated	-20	No	Yes	No	No	Exon	AT2G04160	5922	AIR3	Isolated from differential screening of a cDNA library from auxin-treated root culture. encodes a protein similar to subtilisin-like serine protease which is believed to be active outside the plant cell.	AIR3	Subtilisin-like serine endopeptidase family protein(AIR3)
CpG	604	chr1	20502838	20503546	709	20	-0.618902	-5.16812	0.00069039	0.0315403	Hypomethylated	-20	No	No	No	Yes	Exon	AT1G54960	3062	ANP2	Member of MEKK subfamily	NP2	NPK1-related protein kinase 2(NP2)
CpG	556	chr5	16221167	16222097	931	20	0.641302	5.4265	0.000566813	0.0331414	Hypermethylated	20	No	No	No	Yes	Exon	AT5G40480	8131	EMB3012		EMB3012	embryo defective 3012(EMB3012)
CpG	579	chr3	21688294	21688885	592	17	0.665276	5.49394	0.000601302	0.0423918	Hypermethylated	21	No	No	Yes	No	Exon	AT3G58640	5043	RAF15		AT3G58640	Mitogen activated protein kinase kinase kinase-like protein(AT3G58640)
CpG	190	chr4	16620283	16621192	910	23	0.676774	6.29096	6.47794e-05	0.00562942	Hypermethylated	22	No	No	No	Yes	Exon	AT4G34890	3999	ATXDH1	Encodes a xanthine dehydrogenase, involved in purine catabolism. Ubiquitously expressed, but the transcript level is altered during aging, senescence, salt and cold stress, ABA treatment, and dark treatment. RNAi lines that suppress both XDH1 and XDH2 produce small plants with reduced fertility and accelerated leaf senescence. Role in drought tolerance.	XDH1	xanthine dehydrogenase 1(XDH1)
CpG	169	chr1	30125530	30126811	1282	25	0.743555	6.79982	6.00339e-05	0.00927924	Hypermethylated	24	No	No	Yes	No	Exon	AT1G80070	7683	EMB14	A genetic locus involved in embryogenesis. Mutations in this locus result in an abnormal suspensor and embryo lethality.	SUS2	Pre-mRNA-processing-splicing factor(SUS2)
CpG	484	chr2	2429545	2430794	1250	20	0.796284	5.93732	0.000446383	0.0406023	Hypermethylated	25	No	No	No	Yes	Exon	AT2G06210	5893	ELF8	Encodes a yeast CTR9 homolog that is involved in the control of flowering time by elevating FLC expression to a level that creates the vernalization-responsive, winter-annual habit. Yeast CTR9 is a component of a five-member PAF1 complex that associates with RNA pol II and is thought to regulate gene expression by recruiting SET1 (a histone 3 Lys 4 [H3-K4] methyl transferase) to the initially tra…	ELF8	binding protein(ELF8)
CpG	566	chr4	18154993	18155550	558	17	0.799374	5.33022	0.000583015	0.0220687	Hypermethylated	25	No	No	No	Yes	Exon	AT4G38950	3323			AT4G38950	ATP binding microtubule motor family protein(AT4G38950)
CpG	643	chr1	7774508	7775056	549	13	0.78862	5.07367	0.000870492	0.0366952	Hypermethylated	25	No	No	No	Yes	Exon	AT1G22060	6483			AT1G22060	sporulation-specific protein(AT1G22060)
CpG	733	chr4	18011256	18011791	536	13	0.774287	5.01004	0.00144674	0.0413259	Hypermethylated	25	No	No	No	Yes	Exon	AT4G38510	3210	AtVAB2		VAB2	ATPase, V1 complex, subunit B protein(VAB2)
CpG	348	chr1	17059069	17059854	786	13	0.825671	5.67091	0.000240136	0.0181058	Hypermethylated	26	No	No	No	Yes	Exon	AT1G45120	3714			AT1G45120	pseudo(AT1G45120)
CpG	739	chr4	12556952	12557226	275	13	0.814207	4.9703	0.0015763	0.0424706	Hypermethylated	26	No	No	No	Yes	Exon	AT4G24200	3718			AT4G24200	Transcription elongation factor (TFIIS) family protein(AT4G24200)
CpG	164	chr1	20373563	20374014	452	12	0.846925	7.03566	6.00339e-05	0.00927924	Hypermethylated	27	No	No	No	Yes	Exon	AT1G54560	6142	ATXIE	Member of Myosin-like proteins	XIE	Myosin family protein with Dil domain-containing protein(XIE)
CpG	699	chr1	21569243	21569752	510	12	0.855531	4.96893	0.00114064	0.0430014	Hypermethylated	27	No	No	No	Yes	Exon	AT1G58230	3186	BCHB		AT1G58230	binding protein(AT1G58230)
CpG	336	chr3	20792938	20793706	769	19	0.870217	6.29628	0.000229909	0.0301205	Hypermethylated	28	No	Yes	No	No	Exon	AT3G56040	3964	UGP3		UGP3	UDP-glucose pyrophosphorylase 3(UGP3)
CpG	338	chr5	13431290	13432163	874	19	0.870752	5.92682	0.000236172	0.019784	Hypermethylated	28	No	No	No	Yes	Exon	AT5G35180	6974			AT5G35180	ENHANCED DISEASE RESISTANCE protein (DUF1336)(AT5G35180)
CpG	592	chr4	13928413	13928682	270	10	0.989689	5.28131	0.000647794	0.0239335	Hypermethylated	32	No	No	Yes	Yes	Exon	AT4G28000	3075			AT4G28000	P-loop containing nucleoside triphosphate hydrolases superfamily protein(AT4G28000)
CHG	84	chr1	7973649	7974688	1040	61	-0.625636	-7.57106	0.000477342	0.0119105	Hypomethylated	-20	No	No	No	Yes	Exon	AT1G22560	3401			AT1G22560	pseudo(AT1G22560)

## Sheet: 3`UTR
Context	Index	chr	start	end	width	CpGs	betaCoefficient	statistic	p.value	q.value	direction	difference	CpG.Island	CpG.Shore	CpG.Shelf	Open.Sea	annotation	geneId	distanceToTSS	geneSymbol	gene	OFFICIAL_GENE_SYMBOL	Gene Name
CpG	30	chr5	20250236	20250670	435	13	-1.63514	-7.76892	1.57448e-05	0.00279936	Hypomethylated	-52	No	No	No	Yes	3&apos; UTR	AT5G49830	4419	EXO84B	Encodes a member of the exocyst complex gene family. The exocyst is a protein complex involved in tethering vesicles to the plasma membrane during regulated or polarized secretion.	EXO84B	exocyst complex component 84B(EXO84B)
CpG	11	chr1	22781636	22782536	901	10	-1.34194	-10.8308	1.50085e-05	0.00497102	Hypomethylated	-43	No	No	No	Yes	3&apos; UTR	AT1G61690	4406	FYVE4		AT1G61690	phosphoinositide binding protein(AT1G61690)
CpG	389	chr3	6800828	6801547	720	20	-1.11282	-6.03446	0.000282965	0.0301205	Hypomethylated	-35	No	Yes	Yes	No	3&apos; UTR	AT3G19570	3357	QWRF1	Encodes SCO3 (snowy cotyledon3), a member of a largely uncharacterized protein family unique to the plant kingdom. The sco3-1 mutation alters chloroplast morphology and development, reduces chlorophyll accumulation, impairs thylakoid formation and photosynthesis in seedlings, and results in photoinhibition under extreme CO(2) concentrations in mature leaves. SCO3 is targeted to the periphery of p…	SCO3	SNOWY COTYLEDON protein (DUF566)(SCO3)
CpG	240	chr2	363192	364238	1047	41	-0.840825	-7.75404	0.000101451	0.0282724	Hypomethylated	-27	No	No	No	Yes	3&apos; UTR	AT2G01830	3458	AHK4	Histidine kinase: cytokinin-binding receptor that transduces cytokinin signals across the plasma membrane	WOL	CHASE domain containing histidine kinase protein(WOL)
CpG	328	chr1	23034171	23034615	445	18	-0.85793	-5.92975	0.000225127	0.0181058	Hypomethylated	-27	No	No	No	Yes	3&apos; UTR	AT1G62310	5172	JMJ29		AT1G62310	transcription factor jumonji (jmjC) domain-containing protein(AT1G62310)
CpG	424	chr3	16226459	16226953	495	17	-0.840951	-5.86223	0.000336022	0.0317728	Hypomethylated	-27	No	No	No	Yes	3&apos; UTR	AT3G44680	3056	AtHDA9	Class I RPD3 type protein	HDA9	histone deacetylase 9(HDA9)
CpG	189	chr4	8070417	8071136	720	21	-0.831769	-6.28667	6.47794e-05	0.00562942	Hypomethylated	-26	No	No	No	Yes	3&apos; UTR	AT4G13970	4519			AT4G13970	zinc ion binding protein(AT4G13970)
CpG	230	chr4	6805840	6806741	902	38	-0.827145	-6.23855	8.63726e-05	0.00710558	Hypomethylated	-26	No	No	No	Yes	3&apos; UTR	AT4G11160	3668			AT4G11160	Translation initiation factor 2, small GTP-binding protein(AT4G11160)
CpG	51	chr5	8889121	8889967	847	35	-0.777463	-7.41407	1.57448e-05	0.00279936	Hypomethylated	-25	No	No	No	Yes	3&apos; UTR	AT5G25520	4033			AT5G25520	SPOC domain / Transcription elongation factor S-II protein(AT5G25520)
CpG	170	chr1	8312118	8312550	433	18	-0.733405	-6.84754	6.00339e-05	0.00927924	Hypomethylated	-23	No	Yes	Yes	No	3&apos; UTR	AT1G23400	3326	ATCAF2	Promotes the splicing of chloroplast group II introns.	CAF2	RNA-binding CRS1 / YhbY (CRM) domain-containing protein(CAF2)
CpG	236	chr1	19661797	19662258	462	22	-0.70759	-6.43728	9.00509e-05	0.0121034	Hypomethylated	-23	No	No	No	Yes	3&apos; UTR	AT1G52780	3183			AT1G52780	PII, uridylyltransferase (DUF2921)(AT1G52780)
CpG	311	chr1	11253115	11253724	610	23	-0.736936	-6.07381	0.00019511	0.0181058	Hypomethylated	-23	No	No	Yes	Yes	3&apos; UTR	AT1G31420	3515	FEI1	Encodes a plasma membrane localized leucine-rich repeat receptor kinase that is involved in cell wall elongation. Loss of function mutations of FEI1 and FEI2 exhibit defects in root and hypocotyl cell elongation. Double mutants are defective in cell wall biosynthesis and have thick hypocotyls, and short, thick roots.	FEI1	Leucine-rich repeat protein kinase family protein(FEI1)
CpG	445	chr3	20242920	20243718	799	18	-0.683425	-5.83109	0.000353707	0.0317728	Hypomethylated	-22	No	Yes	Yes	No	3&apos; UTR	AT3G54670	7414	ATSMC1	Encodes a member of the Arabidopsis cohesin complex that is essential for viability and sister chromatid alignment.	TTN8	Structural maintenance of chromosomes (SMC) family protein(TTN8)
CpG	689	chr4	11193700	11193998	299	10	-0.675317	-5.12519	0.00103647	0.0321358	Hypomethylated	-21	No	No	No	Yes	3&apos; UTR	AT4G20920	4070			AT4G20920	double-stranded RNA-binding domain (DsRBD)-containing protein(AT4G20920)
CpG	399	chr3	4153120	4154692	1573	32	-0.62663	-5.99983	0.000300651	0.0301205	Hypomethylated	-20	No	No	No	Yes	3&apos; UTR	AT3G12980	6721	ATHPCAT4	Encodes an enzyme with histone acetyltransferase activity that can use both H3 and H4 histones as substrates. No single prior lysine acetylation is sufficient to block HAC5 acetylation of the H3 or H4 peptides, suggesting that HAC5 can acetylate any of several lysines present in the peptides. Di-acetylation of both lysines 9 and 14 on the H3 peptide significantly reduces the level of incorporated…	HAC5	histone acetyltransferase of the CBP family 5(HAC5)
CpG	192	chr4	9713432	9714103	672	13	0.630322	6.46087	6.47794e-05	0.00562942	Hypermethylated	20	No	No	No	Yes	3&apos; UTR	AT4G17380	4748	ATMSH4	Encodes the Arabidopsis homolog of MSH4, a meiosis-specific member of the MutS-homolog family of genes. It is expressed only in floral tissues and only during early meiotic prophase I, preceding the synapsis of homologous chromosomes. It is involved in the early steps of recombination.	MSH4	MUTS-like protein 4(MSH4)
CpG	555	chr5	20866461	20867195	735	17	0.673573	5.43191	0.000566813	0.0331414	Hypermethylated	21	No	No	No	Yes	3&apos; UTR	AT5G51340	3559	SCC4		AT5G51340	Tetratricopeptide repeat (TPR)-like superfamily protein(AT5G51340)
CpG	440	chr4	15884605	15885407	803	17	0.713253	5.60872	0.00034549	0.0167848	Hypermethylated	23	No	No	Yes	No	3&apos; UTR	AT4G32910	3360	NUP85		AT4G32910	nuclear pore complex Nup85-like protein(AT4G32910)
CpG	113	chr3	8047681	8048538	858	25	0.848647	9.0855	3.53707e-05	0.0158419	Hypermethylated	27	No	No	No	Yes	3&apos; UTR	AT3G22760	3254	SOL1	CXC domain containing TSO1-like protein 1. The gene is expressed in stamens, pollen mother cells, and immature ovules.	SOL1	Tesmin/TSO1-like CXC domain-containing protein(SOL1)
CpG	372	chr4	10636915	10637616	702	15	1.0342	5.87576	0.000259118	0.0144032	Hypermethylated	33	No	No	No	Yes	3&apos; UTR	AT4G19510	3296			AT4G19510	Disease resistance protein (TIR-NBS-LRR class)(AT4G19510)
CHG	3	chr5	10929852	10930805	954	67	-1.14732	-14.8206	3.05483e-05	0.00514045	Hypomethylated	-37	No	No	No	Yes	3&apos; UTR	AT5G28900	4217			AT5G28900	Calcium-binding EF-hand family protein(AT5G28900)
CHG	100	chr3	11100067	11100416	350	14	0.669868	6.84268	0.00199614	0.036537	Hypermethylated	21	No	No	No	Yes	3&apos; UTR	AT3G29130	3093			AT3G29130	kxDL motif protein(AT3G29130)

## Sheet: Downstream
Context	Index	chr	start	end	width	CpGs	betaCoefficient	statistic	p.value	q.value	direction	difference	CpG.Island	CpG.Shore	CpG.Shelf	Open.Sea	annotation	geneId	distanceToTSS	geneSymbol	gene	OFFICIAL_GENE_SYMBOL	Gene Name
CpG	8	chr1	25723733	25724236	504	17	-1.44531	-8.6191	1.50085e-05	0.00497102	Hypomethylated	-46	No	No	No	Yes	Downstream	AT1G68550	3150	CRF10	Encodes a member of the ERF (ethylene response factor) subfamily B-6 of ERF/AP2 transcription factor family. The protein contains one AP2 domain. There are 12 members in this subfamily including RAP2.11.
CpG	744	chr4	7382104	7382618	515	14	-0.959826	-4.92434	0.00174904	0.0463159	Hypomethylated	-31	No	No	Yes	No	Downstream	AT4G12450	4313			AT4G12450	zinc finger (C2H2 type) family protein(AT4G12450)
CpG	208	chr3	1962427	1963101	675	75	-0.715132	-7.7474	7.07414e-05	0.016832	Hypomethylated	-23	No	No	Yes	No	Downstream	AT3G06433	3526			AT3G06433	miscRNA(AT3G06433)
CHG	17	chr1	25723553	25724151	599	30	-0.938656	-16.5423	3.18228e-05	0.0026167	Hypomethylated	-30	No	No	No	Yes	Downstream	AT1G68550	3235	CRF10	Encodes a member of the ERF (ethylene response factor) subfamily B-6 of ERF/AP2 transcription factor family. The protein contains one AP2 domain. There are 12 members in this subfamily including RAP2.11.	CRF10	Integrase-type DNA-binding superfamily protein(CRF10)
CHG	57	chr2	6538106	6538748	643	17	0.786368	11.4317	9.35833e-05	0.00945191	Hypermethylated	25	No	No	No	Yes	Downstream	AT2G15090	-3418	KCS8	Encodes KCS8, a member of the 3-ketoacyl-CoA synthase family involved in the biosynthesis of VLCFA (very long chain fatty acids).	KCS8	3-ketoacyl-CoA synthase 8(KCS8)

## Sheet: Distal Intergenic
Context	Index	chr	start	end	width	CpGs	betaCoefficient	statistic	p.value	q.value	direction	difference	CpG.Island	CpG.Shore	CpG.Shelf	Open.Sea	annotation	geneId	distanceToTSS	geneSymbol	gene	OFFICIAL_GENE_SYMBOL	Gene Name
CpG	96	chr4	6281653	6282444	792	21	-1.91956	-15.9477	2.15931e-05	0.00484472	Hypomethylated	-61	No	No	No	Yes	Distal Intergenic	AT4G10040	4705	CYTC-2	Encodes cytochrome c. Promoter directs preferential expression in vascular tissues of cotyledons, leaves, roots, and hypocotyls, and in anthers.	CYTC-2	cytochrome c-2(CYTC-2)
CHG	35	chr4	6281657	6282404	748	29	-0.931097	-14.6802	3.76294e-05	0.00397393	Hypomethylated	-30	No	No	No	Yes	Distal Intergenic	AT4G10040	4709	CYTC-2	Encodes cytochrome c. Promoter directs preferential expression in vascular tissues of cotyledons, leaves, roots, and hypocotyls, and in anthers.	CYTC-2	cytochrome c-2(CYTC-2)
CpG	292	chr2	4651405	4652000	596	12	0.84738	6.83227	0.000182611	0.0282724	Hypermethylated	27	No	No	No	Yes	Distal Intergenic	AT2G11610	-4594			AT2G11610	pseudo(AT2G11610)
CHG	12	chr2	6178888	6179587	700	31	0.909776	13.106	3.11944e-05	0.00672136	Hypermethylated	29	No	No	No	Yes	Distal Intergenic	AT2G14510	-3793			AT2G14510	Leucine-rich repeat protein kinase family protein(AT2G14510)
CHH	65	chr3	216	546	331	56	0.977856	10.6908	0.00292652	0.0717694	Hypermethylated	31	No	No	No	Yes	Distal Intergenic	AT3G01015	3613	MD60		AT3G01015	TPX2 (targeting protein for Xklp2) protein family(AT3G01015)
CpG	289	chr2	6178915	6179500	586	12	1.36604	7.12176	0.000182611	0.0282724	Hypermethylated	43	No	No	No	Yes	Distal Intergenic	AT2G14510	-3820			AT2G14510	Leucine-rich repeat protein kinase family protein(AT2G14510)
CpG	116	chr4	9902259	9902795	537	16	1.3999	6.86668	4.31863e-05	0.00484472	Hypermethylated	45	No	No	No	Yes	Distal Intergenic	AT4G17810	-4026	EMB3022		AT4G17810	C2H2 and C2HC zinc fingers superfamily protein(AT4G17810)
CHG	45	chr3	383	678	296	11	1.46554	14.9465	6.43915e-05	0.00820496	Hypermethylated	47	No	No	No	Yes	Distal Intergenic	AT3G01015	3481	MD60		AT3G01015	TPX2 (targeting protein for Xklp2) protein family(AT3G01015)
