# Supplementary material
Source: Research Square preprint supplement (doi:10.21203/rs.3.rs-10021158/v1)
Supplement: Supplementary file 1 [file 5eacf61bd016a71d39fd3aa6.docx]

**Supplementary Table 1**. Primers used to generate the 1219bp PCR-RFLP amplicon.

| Primer | Sequence | Tm |
| --- | --- | --- |
| agd2_RFLP_fwd | TTCTCAGACAGTGTTCCTCC | 53.8 ºC |
| agd2_RFLP_rvs | CTGCACTTGTTTCAATGGTGC | 55.3 ºC |
