# Supplementary material
Source: Research Square preprint supplement (doi:10.21203/rs.3.rs-10021158/v1)
Supplement: Supplementary file 2 [file 98be124790fffcc6c8b7c70d.docx]

**Supplementary Table 2**. Primers used for RT-qPCR analysis of gene expression responses in *Arabidopsis* wild-type (WT) and *dapat* mutant plants. *UBC9* and *PP2a* were used as reference genes for gene expression normalization. Genes IDs: *CO* (AT5G15840), *FLC* (AT5G10140), *FT* (AT1G65480), *FRI* (AT4G00650), *UBC9* (AT4G27310), *PP2a* (AT3G58500), *MAT2* (AT4G01850), *MAT4* (AT3G17390), *SUVH4* (AT5G13960), *SUHV5* (AT2G35160) and *SUVH6* (AT2G22740).

| Gene | Forward Primer | Reverse Primer |
| --- | --- | --- |
| *CO* | TGTGACACATGCCGGTCAAAC | AAGCAACGCGATTGGCAGAG |
| *FLC* | AAGTAGCCGACAAGTCACCTTC | TGCGTCACAGAGAACAGAAAGC |
| *FT* | ACGAAAATCCAAGTCCCACTGC | ATACACTGTTTGCCTGCCAAGC |
| *FRI* | GCGGTCACAGTTTCAGGTAT | TAAATGCCAGCGGTGACTGG |
| *UBC9* | AAGCATCTGCCTCGACATCT | ATCGATAGCAGCACCTTGGA |
| *PP2a* | TAACGTGGCCAAAATGATGC | GTTCTCCACAACCGCTTGGT |
| *MAT2* | TGGTGCTTTCTCAGGCAAAGAC | ACCACACTCTTTGCTGCTTGC |
| *MAT4* | ACCCAACCAAGGTTGACAGGAG | TAGCCCACTGGCTACAATGCTC |
| *SUVH4* | ACTTTGTTGCTGGACGCATACC | GAGATGTCCTCACATACCAAACCC |
| *SUVH5* | TTCCTTCATTTCTGGCGTTGGG | ACCGCGCAAGGAACTAAGTATTG |
| *SUVH6* | ACGAGAAACCGCCTTTGTTCAC | TGGTGCAACAGCATGACTTTGG |
