# Supplementary material
Source: Research Square preprint supplement (doi:10.21203/rs.3.rs-10021158/v1)
Supplement: Supplementary file 3 [file b4d0271c86d4b0996b9a864a.docx]

**Extended Data Table Legends**

**Extended Data Table 1.** Primers used to amplify the 1219-bp PCR-RFLP fragment from total DNA extracted from *Arabidopsis* wild-type and *dapat* mutant plants.

**Extended Data Table 2.** Primers used in the RT-qPCR analyses performed in this study.

**Extended Data Table 3.** Differentially methylated genes reveal overall promoter hypomethylation in *dapat* mutant plants and differential non-CpG methylation.

**Extended Data Figure Legends**

**Extended Data Figure 1.** Genotyping and phenotype of *Arabidopsis* wild-type and *dapat* mutant plants. Genomic DNA was amplified using primers flanking the *HhaI* site in the *DAPAT* (AT4G33680) gene, generating a 1,219 bp fragment. **a.** In silico *HhaI* digestion pattern. **b.** Lane 1 shows the undigested WT amplicon (1,219 bp), and Lane 2 shows WT DNA digested with *HhaI*, producing fragments of 647 bp, 263 bp, 233 bp, and 76 bp. Lanes 3–9 show independent *dapat* samples after digestion; the point mutation abolishes the main *HhaI* site, resulting in a 910 bp fragment together with 233 bp and 76 bp bands. **c–e.**Phenotypes of five-week-old plants: **c.** wild-type, **d.** *dapat* mutant, **e.** complementation line pUTKan-3xHA::AGD2, grown under 16-h photoperiod (long-days), 20 °C day/18 °C night, and of 150 μmol photons m⁻² s⁻¹ light intensity.

**Extended Data Figure 2.** Developmental phenotype and architectural traits of *Arabidopsis* wild-type (WT) and *dapat* mutant plants grown under a 12-h photoperiod (neutral-days), 20 °C day/18 °C night, and 150 µmol m⁻² s⁻¹ light intensity. **a–b.** Representative plants during the transition to the reproductive phase. **c.** Primary rosette branches (R1). **d.** Secondary rosette branches (R2). **e.** Primary cauline branches (C1). **f.** Secondary cauline branches (C2). g. Rosette leaves (RL). **h.** Cauline leaves (CL). **i.** Total leaf number. **j.** Ratio of primary rosette branches to rosette leaves (R1/RL). Data are presented as mean ± SEM (n = 18). Different letters indicate significant differences between genotypes (one-way ANOVA followed by Tukey’s HSD, α = 0.05).

**Extended Data Figure 3. a-b.** Representative images showing germination dynamics of *Arabidopsis* wild-type (WT) and *dapat* mutant seeds in the absence and presence of sucrose. **c.** Germination rates of seeds germinated without sucrose, under a 12-h photoperiod (neutral-days), 20 °C day/18 °C night, and 150 µmol m⁻² s⁻¹ light intensity. Radicle emergence was used as the criterion for germination. T50 of each genotype displayed in the top left position in c. **d.** Seed phenotype of WT and *dapat* mutant plants under a 16-hour photoperiod (long-days). Seed weight was determined from 50 seeds per plant. Data are presented as mean ± SEM (n = 20). **e.** Total proteins. Data are presented as mean ± SEM (n = 9). **f-g.** Boxplots of fatty acid methyl ester (FAMEs) relative content. **f.** FAMEs profile for C14–C18 species in seeds of WT (light blue) and *dapat* mutant (orange) seeds. **g.** FAMEs profile for C20–C22 species Six biological replicates per genotype were analyzed. Two-tailed Student’s t-tests were used to compare FAME levels between genotypes, with p-values shown above each comparison. The y-axis indicates the relative concentration of each FAME in seed tissue. **h-k.** Boxplots of seed composition traits **h.** carbon content (%C), **i.** nitrogen content (%N), **j.** C/N ratio, and **k.** calibrated δ13C. Data represent four biological replicates per genotype. Two-tailed Student’s t-tests were used to assess differences between genotypes with p-values shown above each comparison. Y-axes denote the percentage of carbon or nitrogen, C/N ratio, or ‰ δ13C in seed tissue.

**Extended Data Figure 4. a.** Phenotype of five-week-old *Arabidopsis* wild-type (WT) and *dapat* mutant plants grown under a 12-hour photoperiod (neutral-days), 20 °C day/18 °C night, and 150 µmol m⁻² s⁻¹ light intensity. Leaf samples for whole-genome bisulfite sequencing were collected from these plants at midday (mid-light period). **b-c.** Leaf morphology of *dapat* after 21 days on pots. Representative leaves were harvested from three independent rosettes to illustrate mutant leaf development. Data represent photographic evidence.

**Extended Data Figure 5. Principal component analysis (PCA) of methylation profiles in *Arabidopsis* wild-type (WT) and *dapat* mutant plants.** PCA plots showing sample clustering based on genome-wide methylation levels. Each point represents an individual biological replicate, colored according to genotype (WT and *dapat*). The three stacked panels correspond to the CpG, CHG, and CHH methylation contexts, respectively. The percentage of variance explained by each principal component (PC1 and PC2) is indicated on the axes. Clear separation between WT and *dapat* samples along PC1 indicates that genotype is a major source of variation in DNA methylation patterns across all sequence contexts.

**Extended Data Figure 6.** **Genome-wide scatter plots of differential DNA methylation across cytosine contexts for gene ontology terms in *dapat* mutant plants.** Each point represents an individual differentially methylated genes (DMGs) with an absolute methylation difference of ≥20% in at least one context, identified by whole-genome bisulfite sequencing. The x-axis shows the CpG methylation difference (%) and the y-axis shows the CHG or CHH methylation difference (%), with negative values indicating hypomethylation and positive values indicating hypermethylation in *dapat* relative to wild-type. Scatter plots are divided into four quadrants: lower-left (CpG hypomethylation with stable or reduced CHG/CHH; blue shading), upper-left (CpG hypomethylation with CHG/CHH hypermethylation), lower-right (CpG hypermethylation with CHG/CHH hypomethylation), and upper-right (concurrent hypermethylation across contexts; pink shading). Point shape indicates cytosine sequence context: circles, CpG; squares, CHH; triangles, CHG. Point color indicates genomic feature annotation: red, promoter; yellow, exon; teal, distal intergenic; blue, 3′UTR. Point size is proportional to the absolute methylation difference (|diff|), with scale given in the legend. Panels correspond to the following GO categories: **a.** cytoskeleton organization (GO:0007010; n= 13 genes). **b.** microtubule-based process (GO:0007017, n= 11 genes). **c.** protein folding (GO:0006457, n= 9 genes). **d.** cellular component disassembly (GO:0022411, n= 8 genes). **e.** protein-containing complex disassembly (GO:0032984, n= 8 genes). **f.** glucan biosynthetic process (GO:0009250, n= 7 genes).

**Extended Data Figure 7.** **Genome-wide scatter plots of differential DNA methylation across cytosine contexts for gene ontology terms in *dapat* mutant plants.** Each point represents an individual differentially methylated genes (DMGs) with an absolute methylation difference of ≥20% in at least one context, identified by whole-genome bisulfite sequencing. The x-axis shows the CpG methylation difference (%) and the y-axis shows the CHG or CHH methylation difference (%), with negative values indicating hypomethylation and positive values indicating hypermethylation in *dapat* relative to wild-type. Scatter plots are divided into four quadrants: lower-left (CpG hypomethylation with stable or reduced CHG/CHH; blue shading), upper-left (CpG hypomethylation with CHG/CHH hypermethylation), lower-right (CpG hypermethylation with CHG/CHH hypomethylation), and upper-right (concurrent hypermethylation across contexts; pink shading). Point shape indicates cytosine sequence context: circles, CpG; squares, CHH; triangles, CHG. Point color indicates genomic feature annotation: red, promoter; yellow, exon; teal, distal intergenic; blue, 3′UTR. Point size is proportional to the absolute methylation difference (|diff|), with scale given in the legend. Panels correspond to the following GO categories: **a.** ERAD pathway (GO:0036503, n= 6 genes). **b.** plant-type cell wall cellulose metabolic process (GO:0052541, n= 3 genes). **c.** plant-type cell wall cellulose biosynthetic process (GO:0052324, n= 3 genes). **d.** cell wall beta-glucan biosynthetic process (GO: 0034410, n= 3 genes). **e.** response to aluminum ion (GO:0010044, n= 3 genes).

**Extended Data Figure 8.** Principal component analysis (PCA) of methylation profiles in *Arabidopsis* wild-type (WT) and *dapat* mutant plants. PCA plots showing sample clustering based on genome-wide methylation levels. Each point represents an individual biological replicate, colored according to genotype (WT and *dapat*). The three stacked panels correspond to the CpG, CHG (H denotes A, T, or C nucleotides), and CHH methylation contexts, respectively. The percentage of variance explained by each principal component (PC1 and PC2) is indicated on the axes. Clear separation between WT and *dapat* samples along PC1 indicates that genotype is a major source of variation in DNA methylation patterns across all sequence contexts.
